# Supplementary material for: Novel mutation in the MPZ gene causes early-onset but slow-progressive Charcot–Marie–Tooth disease in a Russian family: a case report
Source: PubMed Central journal article supplement — J Int Med Res. 2022 Dec 25;50(12):03000605221139718. doi: 10.1177/03000605221139718 (PMC9806381; doi:10.1177/03000605221139718), 2022-12-25
Supplement: sj-pdf-1-imr-10.1177_03000605221139718.pdf [file sj-pdf-1-imr-10.1177_03000605221139718.pdf]

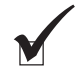

| Topic                           | Item       | Checklist item description                                                                               | Reported on Line                                                    |
|---------------------------------|------------|----------------------------------------------------------------------------------------------------------|---------------------------------------------------------------------|
| <b>Title</b>                    | <b>1</b>   | The words “case report” should be in the title along with the area of focus .....                        | 1-2                                                                 |
| <b>Key Words</b>                | <b>2</b>   | 2 to 5 key words that identify areas covered in this case report.....                                    | 19                                                                  |
| <b>Abstract</b>                 | <b>3a</b>  | Introduction—What is unique about this case? What does it add to the medical literature? .....           | 9-10                                                                |
|                                 | <b>3b</b>  | The main symptoms of the patient and the important clinical findings .....                               | 7-10                                                                |
|                                 | <b>3c</b>  | The main diagnoses, therapeutics interventions, and outcomes .....                                       | 10-14                                                               |
|                                 | <b>3d</b>  | Conclusion—What are the main “take-away” lessons from this case? .....                                   | 14-17                                                               |
| <b>Introduction</b>             | <b>4</b>   | One or two paragraphs summarizing why this case is unique with references ..                             | 22-44                                                               |
| <b>Patient Information</b>      | <b>5a</b>  | De-identified patient specific information .....                                                         | 47-52                                                               |
|                                 | <b>5b</b>  | Main concerns and symptoms of the patient .....                                                          | 53-61                                                               |
|                                 | <b>5c</b>  | Medical, family, and psychosocial history including relevant genetic information (also see timeline). .. | 62-85                                                               |
|                                 | <b>5d</b>  | Relevant past interventions and their outcomes .....                                                     | 62-72                                                               |
| <b>Clinical Findings</b>        | <b>6</b>   | Describe the relevant physical examination (PE) and other significant clinical findings. ....            | 53-61                                                               |
| <b>Timeline</b>                 | <b>7</b>   | Important information from the patient’s history organized as a timeline .....                           | —                                                                   |
| <b>Diagnostic Assessment</b>    | <b>8a</b>  | Diagnostic methods (such as PE, laboratory testing, imaging, surveys). ....                              | 87-108                                                              |
|                                 | <b>8b</b>  | Diagnostic challenges (such as access, financial, or cultural) .....                                     | —                                                                   |
|                                 | <b>8c</b>  | Diagnostic reasoning including other diagnoses considered .....                                          | 87-90                                                               |
|                                 | <b>8d</b>  | Prognostic characteristics (such as staging in oncology) where applicable .....                          | —                                                                   |
| <b>Therapeutic Intervention</b> | <b>9a</b>  | Types of intervention (such as pharmacologic, surgical, preventive, self-care) .....                     | —                                                                   |
|                                 | <b>9b</b>  | Administration of intervention (such as dosage, strength, duration) .....                                | —                                                                   |
|                                 | <b>9c</b>  | Changes in intervention (with rationale) .....                                                           | —                                                                   |
| <b>Follow-up and Outcomes</b>   | <b>10a</b> | Clinician and patient-assessed outcomes (when appropriate) .....                                         | —                                                                   |
|                                 | <b>10b</b> | Important follow-up diagnostic and other test results .....                                              | 103-108                                                             |
|                                 | <b>10c</b> | Intervention adherence and tolerability (How was this assessed?) .....                                   | —                                                                   |
|                                 | <b>10d</b> | Adverse and unanticipated events .....                                                                   | —                                                                   |
| <b>Discussion</b>               | <b>11a</b> | Discussion of the strengths and limitations in your approach to this case .....                          | 111-133                                                             |
|                                 | <b>11b</b> | Discussion of the relevant medical literature. ....                                                      | 134-173                                                             |
|                                 | <b>11c</b> | The rationale for conclusions (including assessment of possible causes) .....                            | 174-180                                                             |
|                                 | <b>11d</b> | The primary “take-away” lessons of this case report .....                                                | 177-180                                                             |
| <b>Patient Perspective</b>      | <b>12</b>  | When appropriate the patient should share their perspective on the treatments they received .....        | —                                                                   |
| <b>Informed Consent</b>         | <b>13</b>  | Did the patient give informed consent? Please provide if requested .....                                 | Yes <input checked="" type="checkbox"/> No <input type="checkbox"/> |
