# Supplementary material for: Novel mutation in the MPZ gene causes early-onset but slow-progressive Charcot–Marie–Tooth disease in a Russian family: a case report
Source: PubMed Central journal article supplement — J Int Med Res. 2022 Dec 25;50(12):03000605221139718. doi: 10.1177/03000605221139718 (PMC9806381; doi:10.1177/03000605221139718), 2022-12-25
Supplement: sj-pdf-2-imr-10.1177_03000605221139718.pdf [file sj-pdf-2-imr-10.1177_03000605221139718.pdf]

## Supplementary methods

### *Whole exome sequencing*

Whole exome sequencing was performed for the proband and his parents by Genotek Ltd. Genomic DNA from peripheral blood samples was isolated using QIAamp DNA Mini Kit (Qiagen, Hilden, Germany) according to the manufacturer's protocol. DNA libraries were then prepared using QIAseq FX DNA Library Kit (Qiagen, Hilden, Germany) according to the manufacturer's protocols. Samples were enriched with SureSelect XT2 kit (Agilent Technologies, Santa Clara, CA, USA) and then sequenced by HiSeq 2500 sequencer (Illumina, San Diego, CA, USA), generating  $2 \times 100$  bp reads. An additional table file shows all genes and exons that have been sequenced. After sequencing, we trimmed 3'-nucleotides with read quality below 10 using Cutadapt.<sup>1</sup> Raw reads were aligned to reference genome hg19 (GRCh37.p13) using BWA MEM.<sup>2</sup> FastQC was used for data quality control. We called short variants using GATK HaplotypeCaller according to GATK Best Practices DNA-seq.<sup>3,4,5</sup> The effect of each mutation was assessed using snpEff.<sup>6</sup> To assess pathogenicity and conservatism, the data was extracted from the dbNSFP, Clinvar, OMIM database and HGMD, as well as using the SIFT and PolyPhen-2 utilities to predict the pathogenicity of the mutation. Information on the frequency of mutations was taken from 1000Genomes project, ExAC) and Genotek frequency data. Description of mutations and their pathogenicity were predicted according to the Standards and Guidelines developed by ACMG (American College of Medical Genetics and Genomics), AMP (Association for Molecular Pathology) and CAP (College of American Pathologists).<sup>7,8,9,10,11,12</sup> Sanger sequencing confirmed all variants identified by exome sequencing.

This variant was classified as a "likely pathogenic" variant according to the variant interpretation guidelines of ACMG (PM1, PM2, PM5, PP2, PP3, PP5). The variant was classified as a "pathogenic" according to the predictive programs SIFT and PolyPhen2 (PolyPhen2 HumDiv score 1,00; PolyPhen2 Hum Var score 0,96; SIFT score 0,00).

1. Martin M. Cutadapt removes adapter sequences from high-throughput sequencing reads. *EMBnet.journal* 2011;17:10.
2. Li H, Durbin R. Fast and accurate short read alignment with Burrows-Wheeler transform. *Bioinformatics* 2009;25:1754–1760.
3. McKenna A *et al.* The genome analysis toolkit: A MapReduce framework for analyzing next-generation DNA sequencing data. *Genome Res* 2010;20:1297–1303.
4. DePristo MA *et al.* A framework for variation discovery and genotyping using next-generation DNA sequencing data. *Nat Genet* 2011;43:491–501.
5. Van der Auwera GA *et al.* From fastQ data to high-confidence variant calls: The genome analysis toolkit best practices pipeline. *Curr Protoc Bioinforma* 2013;43.
6. Cingolani P *et al.* A program for annotating and predicting the effects of single nucleotide polymorphisms, SnpEff: SNPs in the genome of *Drosophila melanogaster* strain w1118; iso-2; iso-3. *Fly (Austin)* 2012;6:80–92.
7. Liu X, Wu C, Li C, Boerwinkle E. dbNSFP v3.0: A One-Stop Database of Functional Predictions and Annotations for Human Nonsynonymous and Splice-Site SNVs. *Hum Mutat* 2016;37:235–241.
8. Ng PC, Henikoff S. SIFT: Predicting amino acid changes that affect protein function. *Nucleic Acids Res* 2003;31:3812–3814.
9. Adzhubei I, Jordan DM, Sunyaev SR. Predicting functional effect of human missense mutations using PolyPhen-2. *Curr Protoc Hum Genet* 2013;Chapter 7.
10. Auton A *et al.* A global reference for human genetic variation. *Nature* 2015;526:68–74.
11. Lek ML *et al.* Analysis of protein-coding genetic variation in 60,706 humans. *Nature* 2016;536.
12. Richards S *et al.* Standards and guidelines for the interpretation of sequence variants: A joint consensus recommendation of the American College of Medical Genetics and Genomics and the Association for Molecular Pathology. *Genet Med* 2015;17:405–424.

| <b>Gene</b> | <b>Transcript</b> | <b>Sequenced exons</b> |
|-------------|-------------------|------------------------|
| AGRN        | NM_198576         | All                    |
| TNFRSF4     | NM_003327         | All                    |
| TAS1R3      | NM_152228         | All                    |
| MRPL20      | NM_017971         | All                    |
| GABRD       | NM_000815         | All                    |
| SKI         | NM_003036         | All                    |
| PEX10       | NM_153818         | All                    |
| MMEL1       | NM_033467         | All                    |
| PRDM16      | NM_022114         | All                    |
| TP73        | NM_005427         | All                    |
| NPHP4       | NM_015102         | All                    |
| KCNAB2      | NM_001199862      | All                    |
| TNFRSF25    | NM_148965         | All                    |
| PLEKHG5     | NM_001265593      | All                    |
| TAS1R1      | NM_138697         | All                    |
| CAMTA1      | NM_015215         | All                    |
| PER3        | NM_016831         | All                    |
| UTS2        | NM_021995         | All                    |
| PARK7       | NM_007262         | All                    |
| ENO1        | NM_001428         | All                    |
| CA6         | NM_001270500      | All                    |
| SLC2A5      | NM_003039         | All                    |
| H6PD        | NM_004285         | All                    |
| PIK3CD      | NM_005026         | All                    |
| KIF1B       | NM_015074         | All                    |
| PGD         | NM_002631         | All                    |
| PEX14       | NM_004565         | All                    |
| MASP2       | NM_006610         | All                    |
| MTOR        | NM_004958         | All                    |
| UBIAD1      | NM_013319         | All                    |
| MTHFR       | NM_005957         | All                    |
| NPPA        | NM_006172         | All                    |
| NPPB        | NM_002521         | All                    |
| PLOD1       | NM_000302         | All                    |
| MFN2        | NM_001127660      | All                    |
| MIIP        | NM_021933         | All                    |
| TNFRSF1B    | NM_001066         | All                    |
| DHRS3       | NM_004753         | All                    |
| CTRC        | NM_007272         | All                    |
| CASP9       | NM_001229         | All                    |
| RSC1A1      | NM_006511         | All                    |

|          |              |     |
|----------|--------------|-----|
| SLC25A34 | NM_207348    | All |
| FBLIM1   | NM_017556    | All |
| HSPB7    | NM_014424    | All |
| EPHA2    | NM_004431    | All |
| SPATA21  | NM_198546    | All |
| ATP13A2  | NM_022089    | All |
| SDHB     | NM_003000    | All |
| PAX7     | NM_002584    | All |
| TAS1R2   | NM_152232    | All |
| ALDH4A1  | NM_003748    | All |
| EMC1     | NM_015047    | All |
| HTR6     | NM_000871    | All |
| PLA2G2A  | NM_001161728 | All |
| PLA2G5   | NM_000929    | All |
| PLA2G2D  | NM_012400    | All |
| CDA      | NM_001785    | All |
| PINK1    | NM_032409    | All |
| DDOST    | NM_005216    | All |
| KIF17    | NM_020816    | All |
| ECE1     | NM_001113349 | All |
| ALPL     | NM_000478    | All |
| HSPG2    | NM_005529    | All |
| WNT4     | NM_030761    | All |
| ZBTB40   | NM_014870    | All |
| C1QA     | NM_015991    | All |
| C1QC     | NM_001114101 | All |
| C1QB     | NM_000491    | All |
| EPHB2    | NM_004442    | All |
| ID3      | NM_002167    | All |
| RPL11    | NM_000975    | All |
| GALE     | NM_001127621 | All |
| HMGCL    | NM_000191    | All |
| FUCA1    | NM_000147    | All |
| CNR2     | NM_001841    | All |
| GRHL3    | NM_198174    | All |
| RUNX3    | NM_004350    | All |
| LDLRAP1  | NM_015627    | All |
| STMN1    | NM_001145454 | All |
| SLC30A2  | NM_001004434 | All |
| TRIM63   | NM_032588    | All |
| CNKSR1   | NM_006314    | All |
| CATSPER4 | NM_198137    | All |
| DHDDS    | NM_024887    | All |
| ARID1A   | NM_006015    | All |
| PIGV     | NM_017837    | All |

|          |              |     |
|----------|--------------|-----|
| NR0B2    | NM_021969    | All |
| NUDC     | NM_006600    | All |
| FCN3     | NM_003665    | All |
| PTAFR    | NM_000952    | All |
| SESN2    | NM_031459    | All |
| OPRD1    | NM_000911    | All |
| EPB41    | NM_001166005 | All |
| PTPRU    | NM_005704    | All |
| FABP3    | NM_004102    | All |
| HCRTR1   | NM_001525    | All |
| CCDC28B  | NM_024296    | All |
| LCK      | NM_001042771 | All |
| TSSK3    | NM_052841    | All |
| YARS     | NM_003680    | All |
| AK2      | NM_001625    | All |
| AZIN2    | NM_052998    | All |
| GJB4     | NM_153212    | All |
| GJB3     | NM_001005752 | All |
| GJA4     | NM_002060    | All |
| DLGAP3   | NM_001080418 | All |
| ZMYM6    | NM_007167    | All |
| SFPQ     | NM_005066    | All |
| AGO1     | NM_012199    | All |
| TEKT2    | NM_014466    | All |
| COL8A2   | NM_005202    | All |
| MRPS15   | NM_031280    | All |
| CSF3R    | NM_156039    | All |
| GRIK3    | NM_000831    | All |
| SNIP1    | NM_024700    | All |
| RSPO1    | NM_001242908 | All |
| MTF1     | NM_005955    | All |
| NDUFS5   | NM_001184979 | All |
| MYCL     | NM_001033082 | All |
| MFSD2A   | NM_001136493 | All |
| PPT1     | NM_000310    | All |
| RLF      | NM_012421    | All |
| ZMPSTE24 | NM_005857    | All |
| COL9A2   | NM_001852    | All |
| SMAP2    | NM_022733    | All |
| EXO5     | NM_022774    | All |
| RIMS3    | NM_014747    | All |
| KCNQ4    | NM_004700    | All |
| EDN2     | NM_001956    | All |
| CLDN19   | NM_148960    | All |
| P3H1     | NM_001243246 | All |

|         |              |     |
|---------|--------------|-----|
| ERMAP   | NM_018538    | All |
| SLC2A1  | NM_006516    | All |
| CFAP57  | NM_001195831 | All |
| MPL     | NM_005373    | All |
| SZT2    | NM_015284    | All |
| PTPRF   | NM_002840    | All |
| ST3GAL3 | NM_174964    | All |
| PTCH2   | NM_003738    | All |
| EIF2B3  | NM_020365    | All |
| UROD    | NM_000374    | All |
| MUTYH   | NM_001128425 | All |
| MMACHC  | NM_015506    | All |
| IPP     | NM_005897    | All |
| POMGNT1 | NM_001243766 | All |
| RAD54L  | NM_001142548 | All |
| UQCRH   | NM_006004    | All |
| FAAH    | NM_001441    | All |
| CYP4B1  | NM_001099772 | All |
| TAL1    | NM_003189    | All |
| STIL    | NM_001048166 | All |
| CMPK1   | NM_016308    | All |
| FOXE3   | NM_012186    | All |
| AGBL4   | NM_032785    | All |
| CDKN2C  | NM_078626    | All |
| ORC1    | NM_001190818 | All |
| SCP2    | NM_002979    | All |
| CPT2    | NM_000098    | All |
| LRP8    | NM_004631    | All |
| DIO1    | NM_001039715 | All |
| MRPL37  | NM_016491    | All |
| PARS2   | NM_152268    | All |
| DHCR24  | NM_014762    | All |
| BSND    | NM_057176    | All |
| PCSK9   | NM_174936    | All |
| USP24   | NM_015306    | All |
| PRKAA2  | NM_006252    | All |
| C8A     | NM_000562    | All |
| C8B     | NM_000066    | All |
| TACSTD2 | NM_002353    | All |
| JUN     | NM_002228    | All |
| HOOK1   | NM_015888    | All |
| CYP2J2  | NM_000775    | All |
| NFIA    | NM_001145512 | All |
| ANGPTL3 | NM_014495    | All |
| FOXD3   | NM_012183    | All |

|             |              |     |
|-------------|--------------|-----|
| ALG6        | NM_013339    | All |
| PGM1        | NM_001172818 | All |
| JAK1        | NM_002227    | All |
| DNAJC6      | NM_001256864 | All |
| LEPR        | NM_002303    | All |
| PDE4B       | NM_002600    | All |
| SLC35D1     | NM_015139    | All |
| IL23R       | NM_144701    | All |
| IL12RB2     | NM_001559    | All |
| RPE65       | NM_000329    | All |
| CTH         | NM_001902    | All |
| NEGR1       | NM_173808    | All |
| FPGT-TNNI3K | NM_001112808 | All |
| TNNI3K      | NM_015978    | All |
| LHX8        | NM_001256114 | All |
| ACADM       | NM_001127328 | All |
| MSH4        | NM_002440    | All |
| NEXN        | NM_144573    | All |
| FUBP1       | NM_003902    | All |
| IFI44L      | NM_006820    | All |
| BCL10       | NM_003921    | All |
| DDAH1       | NM_012137    | All |
| ZNHIT6      | NM_017953    | All |
| CLCA2       | NM_006536    | All |
| CLCA1       | NM_001285    | All |
| SELENOF     | NM_203341    | All |
| ZNF644      | NM_201269    | All |
| TGFBR3      | NM_003243    | All |
| GLMN        | NM_053274    | All |
| GFI1        | NM_001127216 | All |
| EVI5        | NM_005665    | All |
| RPL5        | NM_000969    | All |
| GCLM        | NM_002061    | All |
| ABCA4       | NM_000350    | All |
| ABCD3       | NM_002858    | All |
| F3          | NM_001993    | All |
| ALG14       | NM_144988    | All |
| DPYD        | NM_000110    | All |
| AGL         | NM_000642    | All |
| DBT         | NM_001918    | All |
| VCAM1       | NM_001078    | All |
| S1PR1       | NM_001400    | All |
| COL11A1     | NM_001854    | All |
| NTNG1       | NM_001113226 | All |
| GPSM2       | NM_013296    | All |

|          |              |     |
|----------|--------------|-----|
| SARS     | NM_006513    | All |
| SORT1    | NM_002959    | All |
| GNAI3    | NM_006496    | All |
| GNAT2    | NM_005272    | All |
| GSTM3    | NM_000849    | All |
| CSF1     | NM_000757    | All |
| ALX3     | NM_006492    | All |
| SLC6A17  | NM_001010898 | All |
| RBM15    | NM_022768    | All |
| PROK1    | NM_032414    | All |
| KCNA3    | NM_002232    | All |
| CHI3L2   | NM_004000    | All |
| OVGP1    | NM_002557    | All |
| TMIGD3   | NM_020683    | All |
| ADORA3   | NM_000677    | All |
| DDX20    | NM_007204    | All |
| KCND3    | NM_004980    | All |
| SLC16A1  | NM_003051    | All |
| PTPN22   | NM_015967    | All |
| AP4B1    | NM_001253852 | All |
| TRIM33   | NM_015906    | All |
| AMPD1    | NM_000036    | All |
| NRAS     | NM_002524    | All |
| CSDE1    | NM_001242891 | All |
| TSHB     | NM_000549    | All |
| NGF      | NM_002506    | All |
| VANGL1   | NM_138959    | All |
| CASQ2    | NM_001232    | All |
| SLC22A15 | NM_018420    | All |
| CD58     | NM_001779    | All |
| TTF2     | NM_003594    | All |
| MAN1A2   | NM_006699    | All |
| SPAG17   | NM_206996    | All |
| TBX15    | NM_152380    | All |
| WARS2    | NM_015836    | All |
| PHGDH    | NM_006623    | All |
| HMGCS2   | NM_005518    | All |
| HJV      | NM_213653    | All |
| RBM8A    | NM_005105    | All |
| PEX11B   | NM_003846    | All |
| FMO5     | NM_001461    | All |
| CHD1L    | NM_004284    | All |
| BCL9     | NM_004326    | All |
| GJA5     | NM_181703    | All |
| GJA8     | NM_005267    | All |



|          |              |     |
|----------|--------------|-----|
| VPS45    | NM_007259    | All |
| APH1A    | NM_001077628 | All |
| PRPF3    | NM_004698    | All |
| TARS2    | NM_025150    | All |
| ECM1     | NM_004425    | All |
| ADAMTSL4 | NM_019032    | All |
| MCL1     | NM_021960    | All |
| CTSK     | NM_000396    | All |
| ARNT     | NM_001668    | All |
| SETDB1   | NM_001145415 | All |
| RFX5     | NM_000449    | All |
| PSMB4    | NM_002796    | All |
| POGZ     | NM_015100    | All |
| MRPL9    | NM_031420    | All |
| FLG      | NM_002016    | All |
| LCE5A    | NM_178438    | All |
| LCE3D    | NM_032563    | All |
| SPRR3    | NM_001097589 | All |
| LOR      | NM_000427    | All |
| S100A14  | NM_020672    | All |
| NPR1     | NM_000906    | All |
| GATAD2B  | NM_020699    | All |
| TPM3     | NM_152263    | All |
| HAX1     | NM_006118    | All |
| IL6R     | NM_000565    | All |
| CHRN2    | NM_000748    | All |
| ADAR     | NM_001111    | All |
| KCNN3    | NM_001204087 | All |
| EFNA4    | NM_182689    | All |
| DPM3     | NM_018973    | All |
| MUC1     | NM_001204285 | All |
| CLK2     | NM_003993    | All |
| PKLR     | NM_000298    | All |
| ASH1L    | NM_018489    | All |
| SYT11    | NM_152280    | All |
| RIT1     | NM_001256821 | All |
| LAMTOR2  | NM_014017    | All |
| LMNA     | NM_170707    | All |
| SEMA4A   | NM_001193300 | All |
| SLC25A44 | NM_014655    | All |
| VHLL     | NM_001004319 | All |
| MEF2D    | NM_001271629 | All |
| IQGAP3   | NM_178229    | All |
| MRPL24   | NM_145729    | All |
| PRCC     | NM_005973    | All |

|          |              |     |
|----------|--------------|-----|
| NTRK1    | NM_002529    | All |
| PEAR1    | NM_001080471 | All |
| ARHGEF11 | NM_198236    | All |
| FCRL3    | NM_052939    | All |
| CD1A     | NM_001763    | All |
| CD1E     | NM_030893    | All |
| SPTA1    | NM_003126    | All |
| ACKR1    | NM_001122951 | All |
| FCER1A   | NM_002001    | All |
| CRP      | NM_000567    | All |
| DUSP23   | NM_017823    | All |
| PIGM     | NM_145167    | All |
| KCNJ10   | NM_002241    | All |
| KCNJ9    | NM_004983    | All |
| ATP1A2   | NM_000702    | All |
| PEX19    | NM_002857    | All |
| NCSTN    | NM_015331    | All |
| VANGL2   | NM_020335    | All |
| CD244    | NM_001166663 | All |
| USF1     | NM_001276373 | All |
| NECTIN4  | NM_030916    | All |
| PPOX     | NM_000309    | All |
| NDUFS2   | NM_001166159 | All |
| APOA2    | NM_001643    | All |
| NR1I3    | NM_001077482 | All |
| MPZ      | NM_000530    | All |
| ATF6     | NM_007348    | All |
| NOS1AP   | NM_014697    | All |
| DDR2     | NM_006182    | All |
| PBX1     | NM_002585    | All |
| RXRG     | NM_006917    | All |
| MGST3    | NM_004528    | All |
| ALDH9A1  | NM_000696    | All |
| TMCO1    | NM_019026    | All |
| CD247    | NM_198053    | All |
| ADCY10   | NM_018417    | All |
| TBX19    | NM_005149    | All |
| ATP1B1   | NM_001677    | All |
| SLC19A2  | NM_006996    | All |
| F5       | NM_000130    | All |
| SELP     | NM_003005    | All |
| SELL     | NM_000655    | All |
| SELE     | NM_000450    | All |
| KIFAP3   | NM_014970    | All |
| GORAB    | NM_152281    | All |

|          |              |     |
|----------|--------------|-----|
| PRRX1    | NM_022716    | All |
| FMO3     | NM_006894    | All |
| FMO2     | NM_001460    | All |
| FMO1     | NM_002021    | All |
| FMO4     | NM_002022    | All |
| MYOC     | NM_000261    | All |
| FASLG    | NM_000639    | All |
| TNFSF4   | NM_003326    | All |
| DARS2    | NM_018122    | All |
| SERPINC1 | NM_000488    | All |
| MRPS14   | NM_022100    | All |
| TNR      | NM_003285    | All |
| COP1     | NM_022457    | All |
| SEC16B   | NM_033127    | All |
| AXDND1   | NM_144696    | All |
| NPHS2    | NM_014625    | All |
| LHX4     | NM_033343    | All |
| ACBD6    | NM_032360    | All |
| MR1      | NM_001531    | All |
| CACNA1E  | NM_001205293 | All |
| RNASEL   | NM_021133    | All |
| NPL      | NM_030769    | All |
| DHX9     | NM_001357    | All |
| LAMC1    | NM_002293    | All |
| LAMC2    | NM_005562    | All |
| NCF2     | NM_001127651 | All |
| HMCN1    | NM_031935    | All |
| PTGS2    | NM_000963    | All |
| PLA2G4A  | NM_024420    | All |
| RGS2     | NM_002923    | All |
| TROVE2   | NM_001173524 | All |
| CDC73    | NM_024529    | All |
| CFHR5    | NM_030787    | All |
| F13B     | NM_001994    | All |
| ASPM     | NM_018136    | All |
| ZBTB41   | NM_194314    | All |
| CRB1     | NM_201253    | All |
| LHX9     | NM_020204    | All |
| PTPRC    | NM_002838    | All |
| DDX59    | NM_001031725 | All |
| CACNA1S  | NM_000069    | All |
| TMEM9    | NM_016456    | All |
| PKP1     | NM_000299    | All |
| TNNT2    | NM_001276345 | All |
| LAD1     | NM_005558    | All |

|          |              |     |
|----------|--------------|-----|
| SYT2     | NM_177402    | All |
| ADIPOR1  | NM_015999    | All |
| ADORA1   | NM_001048230 | All |
| CHI3L1   | NM_001276    | All |
| CHIT1    | NM_003465    | All |
| OPTC     | NM_014359    | All |
| ATP2B4   | NM_001684    | All |
| SNRPE    | NM_003094    | All |
| REN      | NM_000537    | All |
| KISS1    | NM_002256    | All |
| MDM4     | NM_002393    | All |
| DSTYK    | NM_015375    | All |
| CDK18    | NM_212503    | All |
| RAB29    | NM_001135662 | All |
| SLC41A1  | NM_173854    | All |
| SLC26A9  | NM_134325    | All |
| AVPR1B   | NM_000707    | All |
| IL10     | NM_000572    | All |
| IL19     | NM_153758    | All |
| PIGR     | NM_002644    | All |
| C4BPA    | NM_000715    | All |
| CR2      | NM_001006658 | All |
| CD46     | NM_172359    | All |
| LAMB3    | NM_000228    | All |
| HSD11B1  | NM_005525    | All |
| IRF6     | NM_006147    | All |
| SYT14    | NM_001146261 | All |
| HHAT     | NM_001122834 | All |
| RD3      | NM_001164688 | All |
| ATF3     | NM_001206484 | All |
| FLVCR1   | NM_014053    | All |
| PTPN14   | NM_005401    | All |
| USH2A    | NM_206933    | All |
| ESRRG    | NM_001438    | All |
| TGFB2    | NM_001135599 | All |
| SLC30A10 | NM_018713    | All |
| IARS2    | NM_018060    | All |
| RAB3GAP2 | NM_012414    | All |
| HLX      | NM_021958    | All |
| MIA3     | NM_198551    | All |
| DISP1    | NM_032890    | All |
| TLR5     | NM_003268    | All |
| LBR      | NM_002296    | All |
| EPHX1    | NM_001136018 | All |
| PARP1    | NM_001618    | All |

|          |              |     |
|----------|--------------|-----|
| PSEN2    | NM_000447    | All |
| COQ8A    | NM_020247    | All |
| MRPL55   | NM_181462    | All |
| GJC2     | NM_020435    | All |
| IBA57    | NM_001010867 | All |
| OBSCN    | NM_001271223 | All |
| TRIM17   | NM_001024940 | All |
| HIST3H3  | NM_003493    | All |
| ACTA1    | NM_001100    | All |
| GALNT2   | NM_004481    | All |
| AGT      | NM_000029    | All |
| GNPAT    | NM_014236    | All |
| EGLN1    | NM_022051    | All |
| DISC1    | NM_001164537 | All |
| TBCE     | NM_001079515 | All |
| B3GALNT2 | NM_152490    | All |
| LYST     | NM_000081    | All |
| NID1     | NM_002508    | All |
| EDARADD  | NM_145861    | All |
| ACTN2    | NM_001103    | All |
| MTR      | NM_000254    | All |
| RYR2     | NM_001035    | All |
| CHRM3    | NM_000740    | All |
| RGS7     | NM_002924    | All |
| EXO1     | NM_130398    | All |
| SDCCAG8  | NM_006642    | All |
| AKT3     | NM_005465    | All |
| ZBTB18   | NM_001278196 | All |
| HNRNPU   | NM_031844    | All |
| SMYD3    | NM_001167740 | All |
| NLRP3    | NM_001079821 | All |
| OR13G1   | NM_001005487 | All |
| SNTG2    | NM_018968    | All |
| TPO      | NM_000547    | All |
| PXDN     | NM_012293    | All |
| MYT1L    | NM_015025    | All |
| RPS7     | NM_001011    | All |
| COLEC11  | NM_001255985 | All |
| ALLC     | NM_018436    | All |
| ADAM17   | NM_003183    | All |
| KLF11    | NM_003597    | All |
| ODC1     | NM_002539    | All |
| ROCK2    | NM_004850    | All |
| LPIN1    | NM_001261428 | All |
| NBAS     | NM_015909    | All |

|                  |              |     |
|------------------|--------------|-----|
| MYCN             | NM_005378    | All |
| GEN1             | NM_182625    | All |
| KCNS3            | NM_002252    | All |
| NT5C1B-<br>RDH14 | NM_001199103 | All |
| NT5C1B           | NM_001199087 | All |
| OSR1             | NM_145260    | All |
| WDR35            | NM_001006657 | All |
| RHOB             | NM_004040    | All |
| HS1BP3           | NM_022460    | All |
| APOB             | NM_000384    | All |
| TP53I3           | NM_004881    | All |
| ITSN2            | NM_006277    | All |
| NCOA1            | NM_003743    | All |
| ADCY3            | NM_004036    | All |
| POMC             | NM_000939    | All |
| DNMT3A           | NM_022552    | All |
| HADHA            | NM_000182    | All |
| HADHB            | NM_000183    | All |
| DRC1             | NM_145038    | All |
| OTOF             | NM_194248    | All |
| KCNK3            | NM_002246    | All |
| KHK              | NM_006488    | All |
| MPV17            | NM_002437    | All |
| EIF2B4           | NM_172195    | All |
| ZNF513           | NM_144631    | All |
| IFT172           | NM_015662    | All |
| GCKR             | NM_001486    | All |
| PCARE            | NM_001029883 | All |
| ALK              | NM_004304    | All |
| CAPN13           | NM_144575    | All |
| XDH              | NM_000379    | All |
| SRD5A2           | NM_000348    | All |
| SPAST            | NM_014946    | All |
| LTBP1            | NM_206943    | All |
| CRIM1            | NM_016441    | All |
| NDUFAF7          | NM_144736    | All |
| PRKD3            | NM_005813    | All |
| CYP1B1           | NM_000104    | All |
| SOS1             | NM_005633    | All |
| SLC8A1           | NM_021097    | All |
| THADA            | NM_022065    | All |
| ABCG5            | NM_022436    | All |
| ABCG8            | NM_022437    | All |
| LRPPRC           | NM_133259    | All |

|           |              |     |
|-----------|--------------|-----|
| PPM1B     | NM_002706    | All |
| SLC3A1    | NM_000341    | All |
| PREPL     | NM_001171603 | All |
| SIX3      | NM_005413    | All |
| SIX2      | NM_016932    | All |
| EPAS1     | NM_001430    | All |
| MCFD2     | NM_001171507 | All |
| TTC7A     | NM_020458    | All |
| EPCAM     | NM_002354    | All |
| MSH2      | NM_000251    | All |
| MSH6      | NM_000179    | All |
| FOXN2     | NM_002158    | All |
| LHCGR     | NM_000233    | All |
| FSHR      | NM_000145    | All |
| NRXN1     | NM_004801    | All |
| PNPT1     | NM_033109    | All |
| EFEMP1    | NM_001039348 | All |
| FANCL     | NM_001114636 | All |
| BCL11A    | NM_022893    | All |
| PEX13     | NM_002618    | All |
| FAM161A   | NM_001201543 | All |
| COMMD1    | NM_152516    | All |
| B3GNT2    | NM_006577    | All |
| WDPCP     | NM_015910    | All |
| MDH1      | NM_001199111 | All |
| CEP68     | NM_015147    | All |
| MEIS1     | NM_002398    | All |
| PROKR1    | NM_138964    | All |
| BMP10     | NM_014482    | All |
| ANTXR1    | NM_032208    | All |
| GFPT1     | NM_001244710 | All |
| NFU1      | NM_001002755 | All |
| ASPRV1    | NM_152792    | All |
| TIA1      | NM_022173    | All |
| FIGLA     | NM_001004311 | All |
| CD207     | NM_015717    | All |
| ATP6V1B1  | NM_001692    | All |
| MCEE      | NM_032601    | All |
| DYSF      | NM_001130987 | All |
| CYP26B1   | NM_019885    | All |
| SPR       | NM_003124    | All |
| RAB11FIP5 | NM_015470    | All |
| ALMS1     | NM_015120    | All |
| STAMBP    | NM_201647    | All |
| DGUOK     | NM_080916    | All |

|          |              |     |
|----------|--------------|-----|
| BOLA3    | NM_212552    | All |
| SLC4A5   | NM_021196    | All |
| DCTN1    | NM_004082    | All |
| MOGS     | NM_006302    | All |
| MRPL53   | NM_053050    | All |
| HTRA2    | NM_013247    | All |
| DOK1     | NM_001381    | All |
| HK2      | NM_000189    | All |
| TACR1    | NM_001058    | All |
| MRPL19   | NM_014763    | All |
| REG1A    | NM_002909    | All |
| SUCLG1   | NM_003849    | All |
| TCF7L1   | NM_031283    | All |
| GGCX     | NM_000821    | All |
| SFTPB    | NM_198843    | All |
| ST3GAL5  | NM_003896    | All |
| IMMT     | NM_006839    | All |
| REEP1    | NM_022912    | All |
| CD8A     | NM_171827    | All |
| FABP1    | NM_001443    | All |
| EIF2AK3  | NM_004836    | All |
| RPIA     | NM_144563    | All |
| MRPS5    | NM_031902    | All |
| ADRA2B   | NM_000682    | All |
| TMEM127  | NM_001193304 | All |
| SNRNP200 | NM_014014    | All |
| ARID5A   | NM_212481    | All |
| CNNM4    | NM_020184    | All |
| SEMA4C   | NM_017789    | All |
| COX5B    | NM_001862    | All |
| ZAP70    | NM_001079    | All |
| CNGA3    | NM_001298    | All |
| INPP4A   | NM_001134224 | All |
| COA5     | NM_001008215 | All |
| LIPT1    | NM_145199    | All |
| AFF3     | NM_001025108 | All |
| CHST10   | NM_004854    | All |
| NPAS2    | NM_002518    | All |
| RFX8     | NM_001145664 | All |
| IL1R1    | NM_000877    | All |
| IL1RL1   | NM_016232    | All |
| IL18R1   | NM_003855    | All |
| IL18RAP  | NM_003853    | All |
| MRPS9    | NM_182640    | All |
| TGFBRAP1 | NM_001142621 | All |



|          |              |     |
|----------|--------------|-----|
| FHL2     | NM_001450    | All |
| NCK2     | NM_001004720 | All |
| SLC5A7   | NM_021815    | All |
| SULT1C2  | NM_176825    | All |
| SULT1C4  | NM_006588    | All |
| EDAR     | NM_022336    | All |
| NPHP1    | NM_001128178 | All |
| BCL2L11  | NM_138621    | All |
| MERTK    | NM_006343    | All |
| IL1A     | NM_000575    | All |
| IL1B     | NM_000576    | All |
| IL36RN   | NM_012275    | All |
| IL1RN    | NM_173842    | All |
| PAX8     | NM_003466    | All |
| DPP10    | NM_001178034 | All |
| INSIG2   | NM_016133    | All |
| STEAP3   | NM_001008410 | All |
| DBI      | NM_001178017 | All |
| GLI2     | NM_005270    | All |
| CNTNAP5  | NM_130773    | All |
| GYPC     | NM_002101    | All |
| BIN1     | NM_139343    | All |
| ERCC3    | NM_000122    | All |
| PROC     | NM_000312    | All |
| MYO7B    | NM_001080527 | All |
| PTPN18   | NM_014369    | All |
| CCNT2    | NM_058241    | All |
| RAB3GAP1 | NM_001172435 | All |
| LCT      | NM_002299    | All |
| MCM6     | NM_005915    | All |
| DARS     | NM_001349    | All |
| CXCR4    | NM_003467    | All |
| HNMT     | NM_006895    | All |
| KYNU     | NM_003937    | All |
| ZEB2     | NM_014795    | All |
| ORC4     | NM_181742    | All |
| MBD5     | NM_018328    | All |
| EPC2     | NM_015630    | All |
| KIF5C    | NM_004522    | All |
| MMADHC   | NM_015702    | All |
| NEB      | NM_004543    | All |
| CACNB4   | NM_000726    | All |
| KCNJ3    | NM_002239    | All |
| NR4A2    | NM_006186    | All |
| GPD2     | NM_000408    | All |

|          |              |     |
|----------|--------------|-----|
| ACVR1C   | NM_145259    | All |
| ACVR1    | NM_001111067 | All |
| SLC4A10  | NM_001178015 | All |
| IFIH1    | NM_022168    | All |
| GRB14    | NM_004490    | All |
| SCN3A    | NM_006922    | All |
| SCN2A    | NM_001040143 | All |
| GALNT3   | NM_004482    | All |
| TTC21B   | NM_024753    | All |
| SCN1A    | NM_006920    | All |
| SCN9A    | NM_002977    | All |
| STK39    | NM_013233    | All |
| CERS6    | NM_001256126 | All |
| G6PC2    | NM_021176    | All |
| ABCB11   | NM_003742    | All |
| DHRS9    | NM_001142271 | All |
| LRP2     | NM_004525    | All |
| BBS5     | NM_152384    | All |
| KLHL41   | NM_006063    | All |
| PPIG     | NM_004792    | All |
| UBR3     | NM_172070    | All |
| GAD1     | NM_000817    | All |
| TLK1     | NM_001136554 | All |
| DCAF17   | NM_025000    | All |
| CYBRD1   | NM_024843    | All |
| SLC25A12 | NM_003705    | All |
| DLX2     | NM_004405    | All |
| ITGA6    | NM_001079818 | All |
| PDK1     | NM_002610    | All |
| WIPF1    | NM_003387    | All |
| CHRNA1   | NM_000079    | All |
| CHN1     | NM_001822    | All |
| ATP5MC3  | NM_001002258 | All |
| HOXD13   | NM_000523    | All |
| HOXD10   | NM_002148    | All |
| HOXD4    | NM_014621    | All |
| NFE2L2   | NM_006164    | All |
| AGPS     | NM_003659    | All |
| PDE11A   | NM_016953    | All |
| PRKRA    | NM_003690    | All |
| PJKV     | NM_001042702 | All |
| TTN      | NM_001256850 | All |
| ZNF385B  | NM_152520    | All |
| ITGA4    | NM_000885    | All |
| CERKL    | NM_201548    | All |

|         |              |     |
|---------|--------------|-----|
| NEUROD1 | NM_002500    | All |
| FRZB    | NM_001463    | All |
| NCKAP1  | NM_205842    | All |
| ZNF804A | NM_194250    | All |
| TFPI    | NM_006287    | All |
| COL3A1  | NM_000090    | All |
| COL5A2  | NM_000393    | All |
| SLC40A1 | NM_014585    | All |
| PMS1    | NM_000534    | All |
| MSTN    | NM_005259    | All |
| HIBCH   | NM_014362    | All |
| GLS     | NM_014905    | All |
| STAT1   | NM_007315    | All |
| SF3B1   | NM_012433    | All |
| MARS2   | NM_138395    | All |
| SATB2   | NM_001172517 | All |
| AOX1    | NM_001159    | All |
| NDUFB3  | NM_002491    | All |
| CFLAR   | NM_003879    | All |
| CASP10  | NM_032977    | All |
| CASP8   | NM_001080125 | All |
| TRAK2   | NM_015049    | All |
| TMEM237 | NM_001044385 | All |
| MPP4    | NM_033066    | All |
| ALS2    | NM_020919    | All |
| SUMO1   | NM_001005781 | All |
| BMPR2   | NM_001204    | All |
| CTLA4   | NM_005214    | All |
| ICOS    | NM_012092    | All |
| PARD3B  | NM_152526    | All |
| NRP2    | NM_201266    | All |
| NDUFS1  | NM_001199984 | All |
| GPR1    | NM_001261455 | All |
| FASTKD2 | NM_001136194 | All |
| CPO     | NM_173077    | All |
| KLF7    | NM_001270944 | All |
| CREB1   | NM_134442    | All |
| CRYGD   | NM_006891    | All |
| CRYGC   | NM_020989    | All |
| CRYGB   | NM_005210    | All |
| IDH1    | NM_005896    | All |
| PIKFYVE | NM_015040    | All |
| MAP2    | NM_002374    | All |
| UNC80   | NM_032504    | All |
| ACADL   | NM_001608    | All |

|          |              |     |
|----------|--------------|-----|
| CPS1     | NM_001875    | All |
| ERBB4    | NM_005235    | All |
| SPAG16   | NM_024532    | All |
| BARD1    | NM_000465    | All |
| ABCA12   | NM_173076    | All |
| ATIC     | NM_004044    | All |
| FN1      | NM_212482    | All |
| PECR     | NM_018441    | All |
| XRCC5    | NM_021141    | All |
| SMARCAL1 | NM_001127207 | All |
| IGFBP5   | NM_000599    | All |
| TNP1     | NM_003284    | All |
| CXCR1    | NM_000634    | All |
| GPBAR1   | NM_170699    | All |
| PNKD     | NM_015488    | All |
| SLC11A1  | NM_000578    | All |
| BCS1L    | NM_001079866 | All |
| CYP27A1  | NM_000784    | All |
| PRKAG3   | NM_017431    | All |
| WNT10A   | NM_025216    | All |
| FEV      | NM_017521    | All |
| IHH      | NM_002181    | All |
| NHEJ1    | NM_024782    | All |
| ABCB6    | NM_005689    | All |
| DNAJB2   | NM_006736    | All |
| DES      | NM_001927    | All |
| GMPPA    | NM_013335    | All |
| OBSL1    | NM_015311    | All |
| INHA     | NM_002191    | All |
| SLC4A3   | NM_201574    | All |
| PAX3     | NM_181459    | All |
| KCNE4    | NM_080671    | All |
| SCG2     | NM_003469    | All |
| MRPL44   | NM_022915    | All |
| CUL3     | NM_003590    | All |
| IRS1     | NM_005544    | All |
| COL4A4   | NM_000092    | All |
| COL4A3   | NM_000091    | All |
| MFF      | NM_020194    | All |
| SLC19A3  | NM_025243    | All |
| TRIP12   | NM_004238    | All |
| SP110    | NM_080424    | All |
| SP100    | NM_001080391 | All |
| GPR55    | NM_005683    | All |
| HTR2B    | NM_000867    | All |

|          |              |     |
|----------|--------------|-----|
| NPPC     | NM_024409    | All |
| DIS3L2   | NM_152383    | All |
| ECEL1    | NM_004826    | All |
| PRSS56   | NM_001195129 | All |
| CHRND    | NM_000751    | All |
| CHRNA    | NM_005199    | All |
| GIGYF2   | NM_001103146 | All |
| KCNJ13   | NM_002242    | All |
| NEU2     | NM_005383    | All |
| ATG16L1  | NM_030803    | All |
| SAG      | NM_000541    | All |
| DGKD     | NM_152879    | All |
| UGT1A8   | NM_019076    | All |
| UGT1A10  | NM_019075    | All |
| UGT1A9   | NM_021027    | All |
| UGT1A7   | NM_019077    | All |
| UGT1A6   | NM_001072    | All |
| UGT1A5   | NM_019078    | All |
| UGT1A4   | NM_007120    | All |
| UGT1A3   | NM_019093    | All |
| UGT1A1   | NM_000463    | All |
| COL6A3   | NM_004369    | All |
| MLPH     | NM_024101    | All |
| HES6     | NM_018645    | All |
| PER2     | NM_022817    | All |
| TRAF3IP1 | NM_015650    | All |
| TWIST2   | NM_001271893 | All |
| HDAC4    | NM_006037    | All |
| NDUFA10  | NM_004544    | All |
| CAPN10   | NM_023083    | All |
| KIF1A    | NM_001244008 | All |
| AGXT     | NM_000030    | All |
| PASK     | NM_001252119 | All |
| ANO7     | NM_001001891 | All |
| HDLBP    | NM_203346    | All |
| D2HGDH   | NM_152783    | All |
| PDCD1    | NM_005018    | All |
| CHL1     | NM_006614    | All |
| CNTN6    | NM_014461    | All |
| CNTN4    | NM_175607    | All |
| TRNT1    | NM_182916    | All |
| CRBN     | NM_016302    | All |
| SUMF1    | NM_182760    | All |
| ITPR1    | NM_001168272 | All |
| GRM7     | NM_181874    | All |

|          |              |     |
|----------|--------------|-----|
| CAV3     | NM_033337    | All |
| OXTR     | NM_000916    | All |
| SRGAP3   | NM_014850    | All |
| SETD5    | NM_001080517 | All |
| MTMR14   | NM_001077525 | All |
| OGG1     | NM_016820    | All |
| CIDEC    | NM_001199551 | All |
| CRELD1   | NM_001031717 | All |
| VHL      | NM_000551    | All |
| GHRL     | NM_001134944 | All |
| ATP2B2   | NM_001001331 | All |
| SLC6A11  | NM_014229    | All |
| SLC6A1   | NM_003042    | All |
| ATG7     | NM_006395    | All |
| PPARG    | NM_015869    | All |
| TSEN2    | NM_001145392 | All |
| RAF1     | NM_002880    | All |
| WNT7A    | NM_004625    | All |
| TMEM43   | NM_024334    | All |
| XPC      | NM_004628    | All |
| MRPS25   | NM_022497    | All |
| COLQ     | NM_005677    | All |
| BTD      | NM_000060    | All |
| THRB     | NM_000461    | All |
| RARB     | NM_000965    | All |
| SLC4A7   | NM_003615    | All |
| EOMES    | NM_001278182 | All |
| TGFBR2   | NM_001024847 | All |
| GPD1L    | NM_015141    | All |
| GLB1     | NM_000404    | All |
| CRTAP    | NM_006371    | All |
| MLH1     | NM_000249    | All |
| ITGA9    | NM_002207    | All |
| PLCD1    | NM_001130964 | All |
| DLEC1    | NM_007337    | All |
| MYD88    | NM_001172567 | All |
| SLC22A14 | NM_004803    | All |
| ACVR2B   | NM_001106    | All |
| SCN5A    | NM_001160161 | All |
| SCN10A   | NM_006514    | All |
| SCN11A   | NM_014139    | All |
| CX3CR1   | NM_001171174 | All |
| SLC25A38 | NM_017875    | All |
| CTNNB1   | NM_001904    | All |
| CCK      | NM_001174138 | All |

|          |              |     |
|----------|--------------|-----|
| KLHL40   | NM_152393    | All |
| CYP8B1   | NM_004391    | All |
| POMGNT2  | NM_032806    | All |
| SNRK     | NM_001100594 | All |
| ABHD5    | NM_016006    | All |
| ZNF35    | NM_003420    | All |
| LARS2    | NM_015340    | All |
| SLC6A20  | NM_020208    | All |
| LZTFL1   | NM_020347    | All |
| FYCO1    | NM_024513    | All |
| XCR1     | NM_001024644 | All |
| CCR1     | NM_001295    | All |
| CCR3     | NM_178328    | All |
| CCR2     | NM_001123041 | All |
| CCR5     | NM_001100168 | All |
| CCRL2    | NM_003965    | All |
| LTF      | NM_002343    | All |
| ALS2CL   | NM_147129    | All |
| TMIE     | NM_147196    | All |
| MYL3     | NM_000258    | All |
| PTH1R    | NM_001184744 | All |
| NBEAL2   | NM_015175    | All |
| SETD2    | NM_014159    | All |
| SCAP     | NM_012235    | All |
| CAMP     | NM_004345    | All |
| TREX1    | NM_033629    | All |
| COL7A1   | NM_000094    | All |
| UQCRC1   | NM_003365    | All |
| SLC26A6  | NM_022911    | All |
| SLC25A20 | NM_000387    | All |
| NDUFAF3  | NM_199069    | All |
| IMPDH2   | NM_000884    | All |
| LAMB2    | NM_002292    | All |
| KLHDC8B  | NM_173546    | All |
| AMT      | NM_000481    | All |
| DAG1     | NM_001177639 | All |
| GMPPB    | NM_013334    | All |
| MST1R    | NM_002447    | All |
| GNAT1    | NM_000172    | All |
| GNAI2    | NM_002070    | All |
| HYAL1    | NM_033159    | All |
| RASSF1   | NM_170714    | All |
| ZMYND10  | NM_015896    | All |
| CISH     | NM_145071    | All |
| DOCK3    | NM_004947    | All |

|          |              |     |
|----------|--------------|-----|
| ACY1     | NM_001198895 | All |
| POC1A    | NM_015426    | All |
| TLR9     | NM_017442    | All |
| GLYCTK   | NM_145262    | All |
| BAP1     | NM_004656    | All |
| TNNC1    | NM_003280    | All |
| NEK4     | NM_003157    | All |
| ITIH1    | NM_002215    | All |
| ITIH3    | NM_002217    | All |
| ITIH4    | NM_002218    | All |
| RFT1     | NM_052859    | All |
| PRKCD    | NM_212539    | All |
| TKT      | NM_001258028 | All |
| CACNA1D  | NM_000720    | All |
| CHDH     | NM_018397    | All |
| IL17RB   | NM_018725    | All |
| CACNA2D3 | NM_018398    | All |
| WNT5A    | NM_001256105 | All |
| IL17RD   | NM_017563    | All |
| HESX1    | NM_003865    | All |
| ARF4     | NM_001660    | All |
| FLNB     | NM_001164317 | All |
| DNASE1L3 | NM_004944    | All |
| PDHB     | NM_000925    | All |
| FEZF2    | NM_018008    | All |
| ATXN7    | NM_001177387 | All |
| PRICKLE2 | NM_198859    | All |
| MAGI1    | NM_001033057 | All |
| SLC25A26 | NM_173471    | All |
| SUCLG2   | NM_003848    | All |
| UBA3     | NM_003968    | All |
| ARL6IP5  | NM_006407    | All |
| MITF     | NM_198159    | All |
| FOXP1    | NM_001244815 | All |
| PROK2    | NM_001126128 | All |
| ROBO2    | NM_002942    | All |
| ROBO1    | NM_002941    | All |
| GBE1     | NM_000158    | All |
| CHMP2B   | NM_014043    | All |
| POU1F1   | NM_001122757 | All |
| EPHA3    | NM_005233    | All |
| ARL13B   | NM_001174150 | All |
| ARL6     | NM_177976    | All |
| CPOX     | NM_000097    | All |
| TBC1D23  | NM_001199198 | All |



|          |              |     |
|----------|--------------|-----|
| TFG      | NM_001195478 | All |
| ABI3BP   | NM_015429    | All |
| IMPG2    | NM_016247    | All |
| TRMT10C  | NM_017819    | All |
| ALCAM    | NM_001627    | All |
| CBLB     | NM_170662    | All |
| MYH15    | NM_014981    | All |
| NECTIN3  | NM_001243288 | All |
| CD96     | NM_005816    | All |
| BTLA     | NM_181780    | All |
| DRD3     | NM_000796    | All |
| ZNF80    | NM_007136    | All |
| GAP43    | NM_001130064 | All |
| ARHGAP31 | NM_020754    | All |
| TMEM39A  | NM_018266    | All |
| NR1I2    | NM_022002    | All |
| GSK3B    | NM_002093    | All |
| NDUFB4   | NM_004547    | All |
| HGD      | NM_000187    | All |
| GTF2E1   | NM_005513    | All |
| POLQ     | NM_199420    | All |
| HCLS1    | NM_005335    | All |
| IQCB1    | NM_001023570 | All |
| SLC15A2  | NM_021082    | All |
| ILDR1    | NM_001199799 | All |
| CD86     | NM_175862    | All |
| CASR     | NM_001178065 | All |
| CSTA     | NM_005213    | All |
| KPNA1    | NM_002264    | All |
| DIRC2    | NM_032839    | All |
| ADCY5    | NM_183357    | All |
| CCDC14   | NM_022757    | All |
| KALRN    | NM_001024660 | All |
| UMPS     | NM_000373    | All |
| MUC13    | NM_033049    | All |
| UROC1    | NM_001165974 | All |
| CHST13   | NM_152889    | All |
| MGLL     | NM_001003794 | All |
| RUVBL1   | NM_003707    | All |
| GATA2    | NM_032638    | All |
| RAB7A    | NM_004637    | All |
| ACAD9    | NM_014049    | All |
| GP9      | NM_000174    | All |
| CNBP     | NM_001127192 | All |
| MBD4     | NM_003925    | All |

|         |              |     |
|---------|--------------|-----|
| RHO     | NM_000539    | All |
| PLXND1  | NM_015103    | All |
| TRH     | NM_007117    | All |
| COL6A5  | NM_001278298 | All |
| PIK3R4  | NM_014602    | All |
| ATP2C1  | NM_001199180 | All |
| MRPL3   | NM_007208    | All |
| NPHP3   | NM_153240    | All |
| BFSP2   | NM_003571    | All |
| TOPBP1  | NM_007027    | All |
| TF      | NM_001063    | All |
| SLCO2A1 | NM_005630    | All |
| RYK     | NM_001005861 | All |
| CEP63   | NM_025180    | All |
| PCCB    | NM_000532    | All |
| STAG1   | NM_005862    | All |
| SLC35G2 | NM_001097600 | All |
| IL20RB  | NM_144717    | All |
| A4GNT   | NM_016161    | All |
| PIK3CB  | NM_006219    | All |
| FOXL2   | NM_023067    | All |
| MRPS22  | NM_020191    | All |
| CLSTN2  | NM_022131    | All |
| ATR     | NM_001184    | All |
| TRPC1   | NM_001251845 | All |
| CHST2   | NM_004267    | All |
| SLC9A9  | NM_173653    | All |
| PLOD2   | NM_182943    | All |
| ZIC4    | NM_001168378 | All |
| ZIC1    | NM_003412    | All |
| AGTR1   | NM_004835    | All |
| HPS3    | NM_032383    | All |
| WWTR1   | NM_001168280 | All |
| CLRN1   | NM_001195794 | All |
| P2RY12  | NM_176876    | All |
| AADA2L2 | NM_207365    | All |
| AADAC   | NM_001086    | All |
| MBNL1   | NM_207293    | All |
| DHX36   | NM_020865    | All |
| MME     | NM_007288    | All |
| SLC33A1 | NM_004733    | All |
| GMPS    | NM_003875    | All |
| RSRC1   | NM_001271838 | All |
| GFM1    | NM_024996    | All |
| IL12A   | NM_000882    | All |

|          |              |     |
|----------|--------------|-----|
| IFT80    | NM_020800    | All |
| B3GALNT1 | NM_033169    | All |
| SI       | NM_001041    | All |
| BCHE     | NM_000055    | All |
| SERPINI2 | NM_001012303 | All |
| PDCD10   | NM_145860    | All |
| SERPINI1 | NM_001122752 | All |
| SLC2A2   | NM_000340    | All |
| GHSR     | NM_198407    | All |
| TNFSF10  | NM_003810    | All |
| SPATA16  | NM_031955    | All |
| NLGN1    | NM_014932    | All |
| TBL1XR1  | NM_024665    | All |
| GNB4     | NM_021629    | All |
| MRPL47   | NM_020409    | All |
| CCDC39   | NM_181426    | All |
| DNAJC19  | NM_145261    | All |
| SOX2     | NM_003106    | All |
| MCCC1    | NM_020166    | All |
| MCF2L2   | NM_015078    | All |
| KLHL6    | NM_130446    | All |
| PARL     | NM_018622    | All |
| ABCC5    | NM_005688    | All |
| HTR3C    | NM_130770    | All |
| EIF2B5   | NM_003907    | All |
| ALG3     | NM_005787    | All |
| EIF4G1   | NM_001194947 | All |
| CLCN2    | NM_004366    | All |
| THPO     | NM_000460    | All |
| EHHADH   | NM_001966    | All |
| MAP3K13  | NM_004721    | All |
| LIPH     | NM_139248    | All |
| CRYGS    | NM_017541    | All |
| AHSG     | NM_001622    | All |
| HRG      | NM_000412    | All |
| KNG1     | NM_001102416 | All |
| ADIPOQ   | NM_004797    | All |
| MASP1    | NM_001879    | All |
| SST      | NM_001048    | All |
| BCL6     | NM_001706    | All |
| LPP      | NM_005578    | All |
| TP63     | NM_003722    | All |
| P3H2     | NM_018192    | All |
| CLDN1    | NM_021101    | All |
| CLDN16   | NM_006580    | All |

|          |              |     |
|----------|--------------|-----|
| CCDC50   | NM_178335    | All |
| ATP13A4  | NM_032279    | All |
| OPA1     | NM_130837    | All |
| APOD     | NM_001647    | All |
| TFRC     | NM_001128148 | All |
| PCYT1A   | NM_005017    | All |
| TM4SF19  | NM_001204897 | All |
| RNF168   | NM_152617    | All |
| MELTF    | NM_005929    | All |
| DLG1     | NM_004087    | All |
| RUBCN    | NM_014687    | All |
| PDE6B    | NM_000283    | All |
| ATP5ME   | NM_007100    | All |
| GAK      | NM_005255    | All |
| IDUA     | NM_000203    | All |
| SLC26A1  | NM_022042    | All |
| FGFRL1   | NM_001004358 | All |
| RNF212   | NM_001131034 | All |
| UVSSA    | NM_020894    | All |
| SLBP     | NM_006527    | All |
| FGFR3    | NM_001163213 | All |
| LETM1    | NM_012318    | All |
| NSD2     | NM_001042424 | All |
| NELFA    | NM_005663    | All |
| NAT8L    | NM_178557    | All |
| SH3BP2   | NM_001145856 | All |
| ADD1     | NM_014189    | All |
| GRK4     | NM_182982    | All |
| HTT      | NM_002111    | All |
| DOK7     | NM_173660    | All |
| LRPAP1   | NM_002337    | All |
| ADRA2C   | NM_000683    | All |
| MSX1     | NM_002448    | All |
| EVC2     | NM_147127    | All |
| EVC      | NM_153717    | All |
| WFS1     | NM_006005    | All |
| PPP2R2C  | NM_181876    | All |
| KIAA0232 | NM_001100590 | All |
| CPZ      | NM_001014447 | All |
| HMX1     | NM_018942    | All |
| SLC2A9   | NM_020041    | All |
| WDR1     | NM_017491    | All |
| CLNK     | NM_052964    | All |
| RAB28    | NM_001017979 | All |
| NKX3-2   | NM_001189    | All |

|          |              |     |
|----------|--------------|-----|
| CC2D2A   | NM_001080522 | All |
| BST1     | NM_004334    | All |
| CD38     | NM_001775    | All |
| FGFBP1   | NM_005130    | All |
| PROM1    | NM_006017    | All |
| QDPR     | NM_000320    | All |
| KCNIP4   | NM_001035003 | All |
| ADGRA3   | NM_145290    | All |
| PPARGC1A | NM_013261    | All |
| SOD3     | NM_003102    | All |
| SEPSECS  | NM_016955    | All |
| SLC34A2  | NM_006424    | All |
| CCKAR    | NM_000730    | All |
| STIM2    | NM_001169118 | All |
| DTHD1    | NM_001170700 | All |
| TBC1D1   | NM_015173    | All |
| TLR10    | NM_001017388 | All |
| TLR1     | NM_003263    | All |
| TLR6     | NM_006068    | All |
| WDR19    | NM_025132    | All |
| KLB      | NM_175737    | All |
| LIAS     | NM_006859    | All |
| CHRNA9   | NM_017581    | All |
| NSUN7    | NM_024677    | All |
| UHL1     | NM_004181    | All |
| PHOX2B   | NM_003924    | All |
| GRXCR1   | NM_001080476 | All |
| GABRG1   | NM_173536    | All |
| GABRA2   | NM_000807    | All |
| COX7B2   | NM_130902    | All |
| GABRA4   | NM_001204266 | All |
| GABRB1   | NM_000812    | All |
| ATP10D   | NM_020453    | All |
| CORIN    | NM_006587    | All |
| CNGA1    | NM_001142564 | All |
| SGCB     | NM_000232    | All |
| USP46    | NM_022832    | All |
| FIP1L1   | NM_001134937 | All |
| PDGFRA   | NM_006206    | All |
| KIT      | NM_000222    | All |
| KDR      | NM_002253    | All |
| SRD5A3   | NM_024592    | All |
| TMEM165  | NM_018475    | All |
| CLOCK    | NM_004898    | All |
| NMU      | NM_006681    | All |

|           |              |     |
|-----------|--------------|-----|
| CEP135    | NM_025009    | All |
| PPAT      | NM_002703    | All |
| SRP72     | NM_006947    | All |
| IGFBP7    | NM_001553    | All |
| EPHA5     | NM_004439    | All |
| GNRHR     | NM_000406    | All |
| TMPRSS11A | NM_182606    | All |
| UGT2A2    | NM_001105677 | All |
| UGT2A1    | NM_001252274 | All |
| SULT1B1   | NM_014465    | All |
| SULT1E1   | NM_005420    | All |
| HTN3      | NM_000200    | All |
| MUC7      | NM_152291    | All |
| ENAM      | NM_031889    | All |
| DCK       | NM_000788    | All |
| SLC4A4    | NM_001134742 | All |
| GC        | NM_001204307 | All |
| NPFFR2    | NM_004885    | All |
| ALB       | NM_000477    | All |
| AFP       | NM_001134    | All |
| CXCL8     | NM_000584    | All |
| CXCL5     | NM_002994    | All |
| BTC       | NM_001729    | All |
| ODAPH     | NM_001206981 | All |
| CXCL10    | NM_001565    | All |
| CXCL11    | NM_005409    | All |
| SCARB2    | NM_005506    | All |
| SHROOM3   | NM_020859    | All |
| MRPL1     | NM_020236    | All |
| FRAS1     | NM_025074    | All |
| BMP2K     | NM_198892    | All |
| GK2       | NM_033214    | All |
| ANTXR2    | NM_001145794 | All |
| HNRNPD    | NM_031370    | All |
| HNRNPDL   | NM_031372    | All |
| COQ2      | NM_015697    | All |
| HELQ      | NM_133636    | All |
| ABRAXAS1  | NM_139076    | All |
| CDS1      | NM_001263    | All |
| WDFY3     | NM_014991    | All |
| ARHGAP24  | NM_001025616 | All |
| MAPK10    | NM_002753    | All |
| PTPN13    | NM_080685    | All |
| AFF1      | NM_001166693 | All |
| HSD17B11  | NM_016245    | All |

|          |              |     |
|----------|--------------|-----|
| DSPP     | NM_014208    | All |
| DMP1     | NM_004407    | All |
| IBSP     | NM_004967    | All |
| SPP1     | NM_001040058 | All |
| PKD2     | NM_000297    | All |
| ABCG2    | NM_004827    | All |
| SNCA     | NM_001146055 | All |
| GRID2    | NM_001510    | All |
| SMARCAD1 | NM_001128430 | All |
| PDLIM5   | NM_001256426 | All |
| BMPR1B   | NM_001256793 | All |
| UNC5C    | NM_003728    | All |
| EIF4E    | NM_001130678 | All |
| ADH4     | NM_000670    | All |
| ADH6     | NM_001102470 | All |
| ADH1A    | NM_000667    | All |
| ADH7     | NM_001166504 | All |
| MTTP     | NM_000253    | All |
| BANK1    | NM_017935    | All |
| NFKB1    | NM_003998    | All |
| MANBA    | NM_005908    | All |
| TACR3    | NM_001059    | All |
| TET2     | NM_001127208 | All |
| AIMP1    | NM_001142415 | All |
| DKK2     | NM_014421    | All |
| CYP2U1   | NM_183075    | All |
| HADH     | NM_001184705 | All |
| LEF1     | NM_016269    | All |
| ETNPPL   | NM_031279    | All |
| COL25A1  | NM_198721    | All |
| CFI      | NM_000204    | All |
| GAR1     | NM_032993    | All |
| RRH      | NM_006583    | All |
| LRIT3    | NM_198506    | All |
| EGF      | NM_001963    | All |
| PITX2    | NM_001204398 | All |
| LARP7    | NM_015454    | All |
| ANK2     | NM_001148    | All |
| UGT8     | NM_001128174 | All |
| PRSS12   | NM_003619    | All |
| MYOZ2    | NM_016599    | All |
| FABP2    | NM_000134    | All |
| MAD2L1   | NM_002358    | All |
| PRDM5    | NM_018699    | All |
| ANXA5    | NM_001154    | All |

|          |              |     |
|----------|--------------|-----|
| CCNA2    | NM_001237    | All |
| BBS7     | NM_176824    | All |
| TRPC3    | NM_001130698 | All |
| IL2      | NM_000586    | All |
| IL21     | NM_021803    | All |
| BBS12    | NM_152618    | All |
| FGF2     | NM_002006    | All |
| NUDT6    | NM_007083    | All |
| FAT4     | NM_024582    | All |
| SLC25A31 | NM_031291    | All |
| MFSD8    | NM_152778    | All |
| PABPC4L  | NM_001114734 | All |
| PCDH18   | NM_019035    | All |
| NDUFC1   | NM_001184990 | All |
| MGST2    | NM_002413    | All |
| UCP1     | NM_021833    | All |
| FREM3    | NM_001168235 | All |
| HHIP     | NM_022475    | All |
| SMAD1    | NM_005900    | All |
| MMAA     | NM_172250    | All |
| EDNRA    | NM_001957    | All |
| PRMT9    | NM_138364    | All |
| NR3C2    | NM_000901    | All |
| LRBA     | NM_006726    | All |
| FBXW7    | NM_033632    | All |
| TRIM2    | NM_015271    | All |
| TLR2     | NM_003264    | All |
| DCHS2    | NM_001142552 | All |
| FGB      | NM_005141    | All |
| FGA      | NM_000508    | All |
| FGG      | NM_021870    | All |
| LRAT     | NM_004744    | All |
| NPY2R    | NM_000910    | All |
| TDO2     | NM_005651    | All |
| PDGFC    | NM_016205    | All |
| GLRB     | NM_000824    | All |
| ETFDH    | NM_004453    | All |
| NPY1R    | NM_000909    | All |
| MSMO1    | NM_006745    | All |
| CPE      | NM_001873    | All |
| TLL1     | NM_012464    | All |
| PALLD    | NM_001166108 | All |
| NEK1     | NM_001199397 | All |
| HAND2    | NM_021973    | All |
| HPGD     | NM_000860    | All |



|          |              |     |
|----------|--------------|-----|
| AGA      | NM_000027    | All |
| TENM3    | NM_001080477 | All |
| DCTD     | NM_001012732 | All |
| TRAPPC11 | NM_021942    | All |
| IRF2     | NM_002199    | All |
| CASP3    | NM_032991    | All |
| SLC25A4  | NM_001151    | All |
| PDLIM3   | NM_014476    | All |
| TLR3     | NM_003265    | All |
| CYP4V2   | NM_207352    | All |
| KLKB1    | NM_000892    | All |
| F11      | NM_000128    | All |
| MTNR1A   | NM_005958    | All |
| AHRR     | NM_001242412 | All |
| SLC6A19  | NM_001003841 | All |
| SLC6A18  | NM_182632    | All |
| TERT     | NM_198253    | All |
| SLC6A3   | NM_001044    | All |
| NDUFS6   | NM_004553    | All |
| IRX4     | NM_016358    | All |
| ADAMTS16 | NM_139056    | All |
| NSUN2    | NM_017755    | All |
| MTRR     | NM_024010    | All |
| CCT5     | NM_012073    | All |
| ROPN1L   | NM_001201466 | All |
| CTNND2   | NM_001332    | All |
| DNAH5    | NM_001369    | All |
| TRIO     | NM_007118    | All |
| ANKH     | NM_054027    | All |
| RETREG1  | NM_001034850 | All |
| DROSHA   | NM_013235    | All |
| NPR3     | NM_001204375 | All |
| SLC45A2  | NM_016180    | All |
| AMACR    | NM_001167595 | All |
| RAD1     | NM_002853    | All |
| AGXT2    | NM_031900    | All |
| PRLR     | NM_000949    | All |
| SPEF2    | NM_024867    | All |
| IL7R     | NM_002185    | All |
| SLC1A3   | NM_004172    | All |
| NIPBL    | NM_133433    | All |
| CPLANE1  | NM_023073    | All |
| NUP155   | NM_153485    | All |
| GDNF     | NM_001190468 | All |
| LIFR     | NM_002310    | All |

|          |              |     |
|----------|--------------|-----|
| OSMR     | NM_003999    | All |
| C9       | NM_001737    | All |
| DAB2     | NM_001343    | All |
| PTGER4   | NM_000958    | All |
| C7       | NM_000587    | All |
| C6       | NM_000065    | All |
| OXCT1    | NM_000436    | All |
| GHR      | NM_000163    | All |
| SELENOP  | NM_005410    | All |
| NNT      | NM_182977    | All |
| FGF10    | NM_004465    | All |
| MRPS30   | NM_016640    | All |
| HCN1     | NM_021072    | All |
| ISL1     | NM_002202    | All |
| ITGA2    | NM_002203    | All |
| MOCS2    | NM_004531    | All |
| NDUFS4   | NM_002495    | All |
| HSPB3    | NM_006308    | All |
| CCNO     | NM_021147    | All |
| IL31RA   | NM_139017    | All |
| MAP3K1   | NM_005921    | All |
| PDE4D    | NM_001104631 | All |
| ERCC8    | NM_000082    | All |
| KIF2A    | NM_001098511 | All |
| HTR1A    | NM_000524    | All |
| SREK1    | NM_001077199 | All |
| MAST4    | NM_001164664 | All |
| PIK3R1   | NM_181523    | All |
| SLC30A5  | NM_022902    | All |
| MRPS36   | NM_033281    | All |
| CDK7     | NM_001799    | All |
| MARVELD2 | NM_001038603 | All |
| BDP1     | NM_018429    | All |
| MCCC2    | NM_022132    | All |
| CARTPT   | NM_004291    | All |
| MRPS27   | NM_015084    | All |
| ARHGEF28 | NM_001080479 | All |
| HEXB     | NM_000521    | All |
| HMGCR    | NM_000859    | All |
| COL4A3BP | NM_001130105 | All |
| IQGAP2   | NM_006633    | All |
| F2R      | NM_001992    | All |
| F2RL1    | NM_005242    | All |
| AGGF1    | NM_018046    | All |
| PDE8B    | NM_003719    | All |

|          |              |     |
|----------|--------------|-----|
| AP3B1    | NM_003664    | All |
| ARSB     | NM_000046    | All |
| DMGDH    | NM_013391    | All |
| BHMT     | NM_001713    | All |
| HOMER1   | NM_004272    | All |
| THBS4    | NM_003248    | All |
| DHFR     | NM_000791    | All |
| MSH3     | NM_002439    | All |
| XRCC4    | NM_022406    | All |
| VCAN     | NM_004385    | All |
| COX7C    | NM_001867    | All |
| RASA1    | NM_002890    | All |
| MEF2C    | NM_001193347 | All |
| ADGRV1   | NM_032119    | All |
| NR2F1    | NM_005654    | All |
| TTC37    | NM_014639    | All |
| PCSK1    | NM_000439    | All |
| CAST     | NM_001042440 | All |
| ERAP1    | NM_016442    | All |
| ERAP2    | NM_001130140 | All |
| SLCO4C1  | NM_180991    | All |
| SLCO6A1  | NM_173488    | All |
| SLC25A46 | NM_138773    | All |
| TSLP     | NM_033035    | All |
| WDR36    | NM_139281    | All |
| CAMK4    | NM_001744    | All |
| APC      | NM_000038    | All |
| DMXL1    | NM_005509    | All |
| HSD17B4  | NM_000414    | All |
| LOX      | NM_002317    | All |
| SNCAIP   | NM_005460    | All |
| CEP120   | NM_153223    | All |
| ALDH7A1  | NM_001201377 | All |
| LMNB1    | NM_005573    | All |
| MEGF10   | NM_001256545 | All |
| FBN2     | NM_001999    | All |
| HINT1    | NM_005340    | All |
| FNIP1    | NM_133372    | All |
| IL3      | NM_000588    | All |
| CSF2     | NM_000758    | All |
| SLC22A4  | NM_003059    | All |
| SLC22A5  | NM_003060    | All |
| IRF1     | NM_002198    | All |
| IL5      | NM_000879    | All |
| RAD50    | NM_005732    | All |

|          |              |     |
|----------|--------------|-----|
| IL13     | NM_002188    | All |
| IL4      | NM_000589    | All |
| GDF9     | NM_005260    | All |
| UQCRQ    | NM_014402    | All |
| TCF7     | NM_003202    | All |
| CDKL3    | NM_001113575 | All |
| UBE2B    | NM_003337    | All |
| SAR1B    | NM_016103    | All |
| CATSPER3 | NM_178019    | All |
| PITX1    | NM_002653    | All |
| IL9      | NM_000590    | All |
| TGFBI    | NM_000358    | All |
| TRPC7    | NM_020389    | All |
| KLHL3    | NM_017415    | All |
| HNRNPA0  | NM_006805    | All |
| MYOT     | NM_006790    | All |
| REEP2    | NM_001271803 | All |
| HSPA9    | NM_004134    | All |
| SIL1     | NM_022464    | All |
| MATR3    | NM_018834    | All |
| SLC23A1  | NM_152685    | All |
| TMEM173  | NM_198282    | All |
| HBEGF    | NM_001945    | All |
| SRA1     | NM_001253764 | All |
| APBB3    | NM_133172    | All |
| CD14     | NM_000591    | All |
| NDUFA2   | NM_002488    | All |
| HARS     | NM_002109    | All |
| HARS2    | NM_012208    | All |
| PCDHA1   | NM_018900    | All |
| PCDHA2   | NM_018905    | All |
| PCDHA3   | NM_018906    | All |
| PCDHA4   | NM_018907    | All |
| PCDHA5   | NM_018908    | All |
| PCDHA6   | NM_018909    | All |
| PCDHA7   | NM_018910    | All |
| PCDHA8   | NM_018911    | All |
| PCDHA9   | NM_031857    | All |
| PCDHA10  | NM_018901    | All |
| PCDHA11  | NM_018902    | All |
| PCDHA12  | NM_018903    | All |
| PCDHA13  | NM_018904    | All |
| PCDHAC1  | NM_018898    | All |
| PCDHAC2  | NM_018899    | All |
| SLC25A2  | NM_031947    | All |

|          |              |     |
|----------|--------------|-----|
| DIAPH1   | NM_005219    | All |
| SPRY4    | NM_030964    | All |
| FGF1     | NM_001257207 | All |
| ARHGAP26 | NM_015071    | All |
| NR3C1    | NM_001018076 | All |
| LARS     | NM_020117    | All |
| POU4F3   | NM_002700    | All |
| PPP2R2B  | NM_181675    | All |
| STK32A   | NM_001112724 | All |
| SPINK1   | NM_003122    | All |
| SCGB3A2  | NM_054023    | All |
| SPINK5   | NM_001127698 | All |
| FBXO38   | NM_030793    | All |
| ADRB2    | NM_000024    | All |
| SH3TC2   | NM_024577    | All |
| PPARGC1B | NM_133263    | All |
| PDE6A    | NM_000440    | All |
| SLC26A2  | NM_000112    | All |
| CSF1R    | NM_005211    | All |
| PDGFRB   | NM_002609    | All |
| TCOF1    | NM_001135243 | All |
| NDST1    | NM_001543    | All |
| SYNPO    | NM_001166208 | All |
| IRGM     | NM_001145805 | All |
| GPX3     | NM_002084    | All |
| GM2A     | NM_000405    | All |
| SLC36A2  | NM_181776    | All |
| GLRA1    | NM_001146040 | All |
| GRIA1    | NM_001258022 | All |
| HAND1    | NM_004821    | All |
| MRPL22   | NM_014180    | All |
| SGCD     | NM_001128209 | All |
| HAVCR1   | NM_001173393 | All |
| ITK      | NM_005546    | All |
| NIPAL4   | NM_001099287 | All |
| ADAM19   | NM_033274    | All |
| IL12B    | NM_002187    | All |
| FABP6    | NM_001130958 | All |
| GABRB2   | NM_021911    | All |
| GABRA6   | NM_000811    | All |
| GABRA1   | NM_001127645 | All |
| GABRG2   | NM_198903    | All |
| WWC1     | NM_001161661 | All |
| RARS     | NM_002887    | All |
| SLIT3    | NM_001271946 | All |

|          |              |     |
|----------|--------------|-----|
| FOX11    | NM_012188    | All |
| KCNMB1   | NM_004137    | All |
| GABRP    | NM_014211    | All |
| NPM1     | NM_002520    | All |
| FBXW11   | NM_012300    | All |
| STK10    | NM_005990    | All |
| SH3PXD2B | NM_001017995 | All |
| NKX2-5   | NM_004387    | All |
| DRD1     | NM_000794    | All |
| HRH2     | NM_001131055 | All |
| CPLX2    | NM_001008220 | All |
| SNCB     | NM_003085    | All |
| TSPAN17  | NM_012171    | All |
| UIMC1    | NM_001199298 | All |
| FGFR4    | NM_213647    | All |
| NSD1     | NM_022455    | All |
| SLC34A1  | NM_003052    | All |
| F12      | NM_000505    | All |
| B4GALT7  | NM_007255    | All |
| PROP1    | NM_006261    | All |
| NHP2     | NM_017838    | All |
| PHYKPL   | NM_153373    | All |
| GRM6     | NM_000843    | All |
| ADAMTS2  | NM_014244    | All |
| HNRNPH1  | NM_001257293 | All |
| LTC4S    | NM_145867    | All |
| SQSTM1   | NM_003900    | All |
| GFPT2    | NM_005110    | All |
| FLT4     | NM_182925    | All |
| MGAT1    | NM_002406    | All |
| IRF4     | NM_002460    | All |
| HUS1B    | NM_148959    | All |
| FOXF2    | NM_001452    | All |
| FOXC1    | NM_001453    | All |
| SERPINB6 | NM_001271822 | All |
| NQO2     | NM_000904    | All |
| FARS2    | NM_006567    | All |
| F13A1    | NM_000129    | All |
| DSP      | NM_004415    | All |
| TFAP2A   | NM_003220    | All |
| GCNT2    | NM_145655    | All |
| MAK      | NM_001242957 | All |
| GCM2     | NM_004752    | All |
| NEDD9    | NM_006403    | All |
| ADTRP    | NM_001143948 | All |

|             |              |     |
|-------------|--------------|-----|
| EDN1        | NM_001955    | All |
| PHACTR1     | NM_001242648 | All |
| SIRT5       | NM_012241    | All |
| DTNBP1      | NM_032122    | All |
| MYLIP       | NM_013262    | All |
| ATXN1       | NM_001128164 | All |
| FAM8A1      | NM_016255    | All |
| NHLRC1      | NM_198586    | All |
| TPMT        | NM_000367    | All |
| PRL         | NM_001163558 | All |
| DCDC2       | NM_016356    | All |
| KAAG1       | NM_181337    | All |
| ALDH5A1     | NM_170740    | All |
| KIAA0319    | NM_014809    | All |
| SLC17A1     | NM_005074    | All |
| SLC17A3     | NM_001098486 | All |
| HIST1H4B    | NM_003544    | All |
| HFE         | NM_000410    | All |
| HIST1H2AE   | NM_021052    | All |
| BTN1A1      | NM_001732    | All |
| PGBD1       | NM_001184743 | All |
| GPX6        | NM_182701    | All |
| ITPR3       | NM_002224    | All |
| HMGA1       | NM_002131    | All |
| RPS10-NUDT3 | NM_001202470 | All |
| RPS10       | NM_001014    | All |
| UHRF1BP1    | NM_017754    | All |
| ANKS1A      | NM_015245    | All |
| PPARD       | NM_006238    | All |
| FANCE       | NM_021922    | All |
| TULP1       | NM_003322    | All |
| FKBP5       | NM_004117    | All |
| CLPS        | NM_001832    | All |
| LHFPL5      | NM_182548    | All |
| PNPLA1      | NM_001145717 | All |
| CDKN1A      | NM_078467    | All |
| BTBD9       | NM_001099272 | All |
| GLO1        | NM_006708    | All |
| DNAH8       | NM_001206927 | All |
| GLP1R       | NM_002062    | All |
| KIF6        | NM_145027    | All |
| MOCS1       | NM_005943    | All |
| UNC5CL      | NM_173561    | All |
| APOBEC2     | NM_006789    | All |
| TREM2       | NM_018965    | All |

|          |              |     |
|----------|--------------|-----|
| PGC      | NM_002630    | All |
| GUCA1A   | NM_000409    | All |
| GUCA1B   | NM_002098    | All |
| MRPS10   | NM_018141    | All |
| TRERF1   | NM_033502    | All |
| PRPH2    | NM_000322    | All |
| CNPY3    | NM_006586    | All |
| GNMT     | NM_018960    | All |
| PEX6     | NM_000287    | All |
| PPP2R5D  | NM_006245    | All |
| CUL7     | NM_001168370 | All |
| MRPL2    | NM_015950    | All |
| PTK7     | NM_001270398 | All |
| SLC22A7  | NM_153320    | All |
| ABCC10   | NM_001198934 | All |
| POLR1C   | NM_203290    | All |
| POLH     | NM_006502    | All |
| RSPH9    | NM_001193341 | All |
| MRPS18A  | NM_018135    | All |
| VEGFA    | NM_001171623 | All |
| MRPL14   | NM_032111    | All |
| SLC29A1  | NM_001078175 | All |
| TCTE1    | NM_182539    | All |
| AARS2    | NM_020745    | All |
| RUNX2    | NM_001024630 | All |
| CYP39A1  | NM_016593    | All |
| SLC25A27 | NM_004277    | All |
| PLA2G7   | NM_001168357 | All |
| CD2AP    | NM_012120    | All |
| MUT      | NM_000255    | All |
| RHAG     | NM_000324    | All |
| CRISP2   | NM_001142407 | All |
| TFAP2B   | NM_003221    | All |
| PKHD1    | NM_138694    | All |
| IL17A    | NM_002190    | All |
| IL17F    | NM_052872    | All |
| EFHC1    | NM_018100    | All |
| GSTA4    | NM_001512    | All |
| ICK      | NM_014920    | All |
| GCLC     | NM_001498    | All |
| TINAG    | NM_014464    | All |
| HCRTR2   | NM_001526    | All |
| BMP5     | NM_021073    | All |
| DST      | NM_001144769 | All |
| RAB23    | NM_016277    | All |



|         |              |     |
|---------|--------------|-----|
| PHF3    | NM_015153    | All |
| EYS     | NM_001142800 | All |
| LMBRD1  | NM_018368    | All |
| COL9A1  | NM_001851    | All |
| RIMS1   | NM_014989    | All |
| KHDC3L  | NM_001017361 | All |
| MTO1    | NM_133645    | All |
| SLC17A5 | NM_012434    | All |
| CD109   | NM_133493    | All |
| COL12A1 | NM_004370    | All |
| COX7A2  | NM_001865    | All |
| MYO6    | NM_004999    | All |
| IMPG1   | NM_001563    | All |
| HTR1B   | NM_000863    | All |
| PHIP    | NM_017934    | All |
| LCA5    | NM_001122769 | All |
| ELOVL4  | NM_022726    | All |
| BCKDHB  | NM_183050    | All |
| TPBG    | NM_001166392 | All |
| NT5E    | NM_002526    | All |
| SYNCRIP | NM_006372    | All |
| CGA     | NM_001252383 | All |
| SLC35A1 | NM_006416    | All |
| RARS2   | NM_020320    | All |
| CNR1    | NM_016083    | All |
| GABRR1  | NM_002042    | All |
| GABRR2  | NM_002043    | All |
| MDN1    | NM_014611    | All |
| EPHA7   | NM_004440    | All |
| NDUFAF4 | NM_014165    | All |
| FBXL4   | NM_012160    | All |
| SIM1    | NM_005068    | All |
| ASCC3   | NM_006828    | All |
| GRIK2   | NM_021956    | All |
| HACE1   | NM_020771    | All |
| LIN28B  | NM_001004317 | All |
| PDSS2   | NM_020381    | All |
| SOBP    | NM_018013    | All |
| SEC63   | NM_007214    | All |
| OSTM1   | NM_014028    | All |
| NR2E1   | NM_003269    | All |
| SNX3    | NM_003795    | All |
| ZBTB24  | NM_014797    | All |
| FIG4    | NM_014845    | All |
| DDO     | NM_003649    | All |

|          |              |     |
|----------|--------------|-----|
| SLC22A16 | NM_033125    | All |
| CDK19    | NM_015076    | All |
| REV3L    | NM_002912    | All |
| TRAF3IP2 | NM_147686    | All |
| WISP3    | NM_198239    | All |
| LAMA4    | NM_001105206 | All |
| FRK      | NM_002031    | All |
| COL10A1  | NM_000493    | All |
| TSPYL1   | NM_003309    | All |
| DSE      | NM_001080976 | All |
| RSPH4A   | NM_001010892 | All |
| RFX6     | NM_173560    | All |
| ROS1     | NM_002944    | All |
| DCBLD1   | NM_173674    | All |
| GOPC     | NM_020399    | All |
| CEP85L   | NM_001178035 | All |
| PLN      | NM_002667    | All |
| FABP7    | NM_001446    | All |
| TRDN     | NM_006073    | All |
| NKAIN2   | NM_001040214 | All |
| SOGA3    | NM_001012279 | All |
| PTPRK    | NM_001135648 | All |
| LAMA2    | NM_000426    | All |
| ARG1     | NM_000045    | All |
| MED23    | NM_004830    | All |
| ENPP1    | NM_006208    | All |
| CTGF     | NM_001901    | All |
| TAAR9    | NM_175057    | All |
| TAAR6    | NM_175067    | All |
| VNN1     | NM_004666    | All |
| RPS12    | NM_001016    | All |
| EYA4     | NM_172105    | All |
| TCF21    | NM_003206    | All |
| SGK1     | NM_001143676 | All |
| ALDH8A1  | NM_022568    | All |
| HBS1L    | NM_006620    | All |
| MYB      | NM_001130173 | All |
| AHI1     | NM_001134830 | All |
| PDE7B    | NM_018945    | All |
| PEX7     | NM_000288    | All |
| IL20RA   | NM_014432    | All |
| IFNGR1   | NM_000416    | All |
| TNFAIP3  | NM_001270507 | All |
| CITED2   | NM_001168389 | All |
| HIVEP2   | NM_006734    | All |

|         |              |     |
|---------|--------------|-----|
| PEX3    | NM_003630    | All |
| FUCA2   | NM_032020    | All |
| PLAGL1  | NM_001080954 | All |
| STX11   | NM_003764    | All |
| UTRN    | NM_007124    | All |
| EPM2A   | NM_005670    | All |
| GRM1    | NM_001278064 | All |
| STXBP5  | NM_139244    | All |
| TAB2    | NM_015093    | All |
| PCMT1   | NM_001252049 | All |
| IYD     | NM_001164694 | All |
| RMND1   | NM_017909    | All |
| CCDC170 | NM_025059    | All |
| ESR1    | NM_001122740 | All |
| SYNE1   | NM_182961    | All |
| VIP     | NM_003381    | All |
| OPRM1   | NM_001008505 | All |
| TFB1M   | NM_016020    | All |
| ARID1B  | NM_020732    | All |
| SERAC1  | NM_032861    | All |
| GTF2H5  | NM_207118    | All |
| SYTL3   | NM_001242384 | All |
| SOD2    | NM_001024465 | All |
| ACAT2   | NM_005891    | All |
| TCP1    | NM_030752    | All |
| MRPL18  | NM_014161    | All |
| IGF2R   | NM_000876    | All |
| SLC22A1 | NM_003057    | All |
| SLC22A2 | NM_003058    | All |
| SLC22A3 | NM_021977    | All |
| PRKN    | NM_004562    | All |
| PACRG   | NM_152410    | All |
| QKI     | NM_006775    | All |
| PDE10A  | NM_001130690 | All |
| TBXT    | NM_003181    | All |
| MPC1    | NM_001270879 | All |
| RNASET2 | NM_003730    | All |
| CCR6    | NM_004367    | All |
| SMOC2   | NM_022138    | All |
| THBS2   | NM_003247    | All |
| TCTE3   | NM_174910    | All |
| DLL1    | NM_005618    | All |
| TBP     | NM_003194    | All |
| FAM20C  | NM_020223    | All |
| DNAAF5  | NM_017802    | All |

|                 |              |     |
|-----------------|--------------|-----|
| CYP2W1          | NM_017781    | All |
| MAD1L1          | NM_001013837 | All |
| NUDT1           | NM_198949    | All |
| CHST12          | NM_001243795 | All |
| LFNG            | NM_001040167 | All |
| BRAT1           | NM_152743    | All |
| CARD11          | NM_032415    | All |
| AP5Z1           | NM_014855    | All |
| RBAK-<br>RBAKDN | NM_001204513 | All |
| ACTB            | NM_001101    | All |
| RAC1            | NM_018890    | All |
| C1GALT1         | NM_020156    | All |
| GLCC1           | NM_138426    | All |
| NDUFA4          | NM_002489    | All |
| THSD7A          | NM_015204    | All |
| ETV1            | NM_001163147 | All |
| AGMO            | NM_001004320 | All |
| ISPD            | NM_001101426 | All |
| AHR             | NM_001621    | All |
| PRPS1L1         | NM_175886    | All |
| HDAC9           | NM_178425    | All |
| TWIST1          | NM_000474    | All |
| ABCB5           | NM_001163941 | All |
| SP8             | NM_182700    | All |
| DNAH11          | NM_001277115 | All |
| IL6             | NM_000600    | All |
| FAM126A         | NM_032581    | All |
| KLHL7           | NM_001031710 | All |
| NPY             | NM_000905    | All |
| MPP6            | NM_016447    | All |
| GSDME           | NM_001127453 | All |
| CYCS            | NM_018947    | All |
| HNRNPA2B1       | NM_031243    | All |
| SNX10           | NM_001199835 | All |
| HOXA1           | NM_005522    | All |
| HOXA2           | NM_006735    | All |
| HOXA4           | NM_002141    | All |
| HOXA10          | NM_018951    | All |
| HOXA11          | NM_005523    | All |
| HOXA13          | NM_000522    | All |
| TRIL            | NM_014817    | All |
| FKBP14          | NM_017946    | All |
| NOD1            | NM_006092    | All |
| GARS            | NM_002047    | All |

|        |              |     |
|--------|--------------|-----|
| INMT   | NM_006774    | All |
| AQP1   | NM_198098    | All |
| GHRHR  | NM_000823    | All |
| NT5C3A | NM_001002010 | All |
| BBS9   | NM_198428    | All |
| BMPER  | NM_133468    | All |
| AOAH   | NM_001177506 | All |
| NME8   | NM_016616    | All |
| POU6F2 | NM_007252    | All |
| MPLKIP | NM_138701    | All |
| SUGCT  | NM_001193313 | All |
| GLI3   | NM_000168    | All |
| MRPL32 | NM_031903    | All |
| BLVRA  | NM_000712    | All |
| MRPS24 | NM_032014    | All |
| PGAM2  | NM_000290    | All |
| GCK    | NM_033507    | All |
| NPC1L1 | NM_013389    | All |
| OGDH   | NM_002541    | All |
| MYO1G  | NM_033054    | All |
| CCM2   | NM_001029835 | All |
| RAMP3  | NM_005856    | All |
| IGFBP1 | NM_000596    | All |
| IGFBP3 | NM_001013398 | All |
| TNS3   | NM_022748    | All |
| PKD1L1 | NM_138295    | All |
| ABCA13 | NM_152701    | All |
| ZPBP   | NM_007009    | All |
| IKZF1  | NM_006060    | All |
| DDC    | NM_000790    | All |
| GRB10  | NM_001001549 | All |
| EGFR   | NM_005228    | All |
| ASL    | NM_000048    | All |
| KCTD7  | NM_153033    | All |
| AUTS2  | NM_015570    | All |
| FZD9   | NM_003508    | All |
| MLXIPL | NM_032951    | All |
| ELN    | NM_000501    | All |
| LIMK1  | NM_002314    | All |
| RFC2   | NM_181471    | All |
| HIP1   | NM_005338    | All |
| CCL26  | NM_006072    | All |
| RHBDD2 | NM_001040456 | All |
| POR    | NM_000941    | All |
| MAGI2  | NM_012301    | All |

|                     |              |     |
|---------------------|--------------|-----|
| CD36                | NM_001127443 | All |
| HGF                 | NM_000601    | All |
| CACNA2D1            | NM_000722    | All |
| SEMA3E              | NM_012431    | All |
| SEMA3A              | NM_006080    | All |
| GRM3                | NM_000840    | All |
| DMTF1               | NM_001142327 | All |
| ABCB4               | NM_018849    | All |
| ABCB1               | NM_000927    | All |
| SLC25A40            | NM_018843    | All |
| SRI                 | NM_003130    | All |
| STEAP4              | NM_024636    | All |
| FZD1                | NM_003505    | All |
| AKAP9               | NM_005751    | All |
| CYP51A1             | NM_000786    | All |
| KRIT1               | NM_194456    | All |
| GATAD1              | NM_021167    | All |
| PEX1                | NM_000466    | All |
| SAMD9               | NM_001193307 | All |
| CALCR               | NM_001742    | All |
| COL1A2              | NM_000089    | All |
| SGCE                | NM_001099400 | All |
| PON1                | NM_000446    | All |
| PON3                | NM_000940    | All |
| PON2                | NM_000305    | All |
| PDK4                | NM_002612    | All |
| SLC25A13            | NM_001160210 | All |
| DLX6                | NM_005222    | All |
| DLX5                | NM_005221    | All |
| NPTX2               | NM_002523    | All |
| TRRAP               | NM_001244580 | All |
| PTCD1               | NM_015545    | All |
| CYP3A7-<br>CYP3A51P | NM_001256497 | All |
| CYP3A7              | NM_000765    | All |
| CYP3A43             | NM_022820    | All |
| GJC3                | NM_181538    | All |
| AP4M1               | NM_004722    | All |
| PCOLCE              | NM_002593    | All |
| TFR2                | NM_003227    | All |
| EPO                 | NM_000799    | All |
| ACHE                | NM_000665    | All |
| SERPINE1            | NM_000602    | All |
| AP1S1               | NM_001283    | All |
| PLOD3               | NM_001084    | All |

|         |              |     |
|---------|--------------|-----|
| SLC26A5 | NM_198999    | All |
| RELN    | NM_173054    | All |
| KMT2E   | NM_018682    | All |
| NAMPT   | NM_005746    | All |
| PIK3CG  | NM_002649    | All |
| COG5    | NM_006348    | All |
| SLC26A4 | NM_000441    | All |
| SLC26A3 | NM_000111    | All |
| DLD     | NM_000108    | All |
| LAMB1   | NM_002291    | All |
| IMMP2L  | NM_001244606 | All |
| DOCK4   | NM_014705    | All |
| IFRD1   | NM_001007245 | All |
| PPP1R3A | NM_002711    | All |
| FOXP2   | NM_148898    | All |
| CAV1    | NM_001753    | All |
| MET     | NM_001127500 | All |
| ST7     | NM_021908    | All |
| CFTR    | NM_000492    | All |
| CTTNBP2 | NM_033427    | All |
| KCND2   | NM_012281    | All |
| TSPAN12 | NM_012338    | All |
| PTPRZ1  | NM_002851    | All |
| AASS    | NM_005763    | All |
| TAS2R16 | NM_016945    | All |
| SLC13A1 | NM_022444    | All |
| NDUFA5  | NM_005000    | All |
| GRM8    | NM_000845    | All |
| PAX4    | NM_006193    | All |
| LRRC4   | NM_022143    | All |
| LEP     | NM_000230    | All |
| RBM28   | NM_018077    | All |
| OPN1SW  | NM_001708    | All |
| FLNC    | NM_001458    | All |
| IRF5    | NM_001098629 | All |
| TNPO3   | NM_012470    | All |
| SMO     | NM_005631    | All |
| CPA4    | NM_016352    | All |
| CEP41   | NM_018718    | All |
| MEST    | NM_002402    | All |
| EXOC4   | NM_021807    | All |
| AKR1B1  | NM_001628    | All |
| BPGM    | NM_001724    | All |
| CNOT4   | NM_001190850 | All |
| CHRM2   | NM_001006632 | All |

|          |              |     |
|----------|--------------|-----|
| AKR1D1   | NM_005989    | All |
| TRIM24   | NM_015905    | All |
| ATP6V0A4 | NM_130841    | All |
| KIAA1549 | NM_001164665 | All |
| ZC3HAV1  | NM_020119    | All |
| UBN2     | NM_173569    | All |
| TBXAS1   | NM_001166253 | All |
| BRAF     | NM_004333    | All |
| MRPS33   | NM_053035    | All |
| AGK      | NM_018238    | All |
| TAS2R3   | NM_016943    | All |
| TAS2R38  | NM_176817    | All |
| EPHB6    | NM_004445    | All |
| KEL      | NM_000420    | All |
| GSTK1    | NM_001143679 | All |
| CASP2    | NM_032982    | All |
| CLCN1    | NM_000083    | All |
| NOBOX    | NM_001080413 | All |
| TPK1     | NM_022445    | All |
| CNTNAP2  | NM_014141    | All |
| EZH2     | NM_004456    | All |
| GIMAP8   | NM_175571    | All |
| AOC1     | NM_001272072 | All |
| KCNH2    | NM_000238    | All |
| NOS3     | NM_000603    | All |
| ABCB8    | NM_007188    | All |
| ASIC3    | NM_020321    | All |
| ASB10    | NM_001142459 | All |
| PRKAG2   | NM_016203    | All |
| GALNTL5  | NM_145292    | All |
| XRCC2    | NM_005431    | All |
| DPP6     | NM_130797    | All |
| HTR5A    | NM_024012    | All |
| INSIG1   | NM_005542    | All |
| EN2      | NM_001427    | All |
| SHH      | NM_000193    | All |
| LMBR1    | NM_022458    | All |
| UBE3C    | NM_014671    | All |
| DNAJB6   | NM_058246    | All |
| PTPRN2   | NM_002847    | All |
| WDR60    | NM_018051    | All |
| VIPR2    | NM_003382    | All |
| DLGAP2   | NM_001277161 | All |
| CLN8     | NM_018941    | All |
| ARHGEF10 | NM_014629    | All |



|           |              |     |
|-----------|--------------|-----|
| CSMD1     | NM_033225    | All |
| MCPH1     | NM_024596    | All |
| DEFB1     | NM_005218    | All |
| PRAG1     | NM_001080826 | All |
| CLDN23    | NM_194284    | All |
| TNKS      | NM_003747    | All |
| RP1L1     | NM_178857    | All |
| SOX7      | NM_031439    | All |
| MTMR9     | NM_015458    | All |
| BLK       | NM_001715    | All |
| GATA4     | NM_002052    | All |
| NEIL2     | NM_001135746 | All |
| FDFT1     | NM_004462    | All |
| CTSB      | NM_001908    | All |
| DLC1      | NM_182643    | All |
| TUSC3     | NM_006765    | All |
| MSR1      | NM_138715    | All |
| FGF20     | NM_019851    | All |
| VPS37A    | NM_152415    | All |
| SLC7A2    | NM_001164771 | All |
| PDGFRL    | NM_006207    | All |
| MTUS1     | NM_001001924 | All |
| PCM1      | NM_006197    | All |
| ASAH1     | NM_004315    | All |
| NAT2      | NM_000015    | All |
| LPL       | NM_000237    | All |
| SLC18A1   | NM_003053    | All |
| LZTS1     | NM_021020    | All |
| FGF17     | NM_003867    | All |
| HR        | NM_005144    | All |
| SFTPC     | NM_001172410 | All |
| BMP1      | NM_006129    | All |
| POLR3D    | NM_001722    | All |
| EGR3      | NM_004430    | All |
| TNFRSF10B | NM_003842    | All |
| TNFRSF10A | NM_003844    | All |
| LOXL2     | NM_002318    | All |
| SLC25A37  | NM_016612    | All |
| NKX3-1    | NM_006167    | All |
| NKX2-6    | NM_001136271 | All |
| ADAM7     | NM_003817    | All |
| NEFM      | NM_005382    | All |
| NEFL      | NM_006158    | All |
| GNRH1     | NM_001083111 | All |
| DPYSL2    | NM_001197293 | All |

|         |              |     |
|---------|--------------|-----|
| ADRA1A  | NM_000680    | All |
| PTK2B   | NM_173176    | All |
| CHRNA2  | NM_000742    | All |
| EPHX2   | NM_001979    | All |
| CLU     | NM_001831    | All |
| ESCO2   | NM_001017420 | All |
| FZD3    | NM_145866    | All |
| EXTL3   | NM_001440    | All |
| GSR     | NM_000637    | All |
| WRN     | NM_000553    | All |
| NRG1    | NM_013956    | All |
| TTI2    | NM_001102401 | All |
| ERLIN2  | NM_007175    | All |
| ADRB3   | NM_000025    | All |
| STAR    | NM_000349    | All |
| DDHD2   | NM_001164232 | All |
| NSD3    | NM_023034    | All |
| FGFR1   | NM_001174067 | All |
| ADAM9   | NM_003816    | All |
| IDO1    | NM_002164    | All |
| ANK1    | NM_001142446 | All |
| PLAT    | NM_000930    | All |
| IKBKB   | NM_001556    | All |
| POLB    | NM_002690    | All |
| SLC20A2 | NM_001257181 | All |
| THAP1   | NM_018105    | All |
| RNF170  | NM_030954    | All |
| HGSNAT  | NM_152419    | All |
| PRKDC   | NM_006904    | All |
| MCM4    | NM_005914    | All |
| SNAI2   | NM_003068    | All |
| RB1CC1  | NM_014781    | All |
| OPRK1   | NM_000912    | All |
| MRPL15  | NM_014175    | All |
| SOX17   | NM_022454    | All |
| RP1     | NM_006269    | All |
| XKR4    | NM_052898    | All |
| LYN     | NM_002350    | All |
| PLAG1   | NM_001114634 | All |
| PENK    | NM_001135690 | All |
| IMPAD1  | NM_017813    | All |
| CYP7A1  | NM_000780    | All |
| CA8     | NM_004056    | All |
| RAB2A   | NM_002865    | All |
| CHD7    | NM_017780    | All |

|         |              |     |
|---------|--------------|-----|
| GGH     | NM_003878    | All |
| TTPA    | NM_000370    | All |
| CYP7B1  | NM_004820    | All |
| CRH     | NM_000756    | All |
| ADHFE1  | NM_144650    | All |
| CSPP1   | NM_024790    | All |
| CPA6    | NM_020361    | All |
| PREX2   | NM_024870    | All |
| SULF1   | NM_001128204 | All |
| EYA1    | NM_172058    | All |
| TMEM70  | NM_017866    | All |
| LY96    | NM_015364    | All |
| GDAP1   | NM_018972    | All |
| ZFHX4   | NM_024721    | All |
| PEX2    | NM_001172087 | All |
| IL7     | NM_000880    | All |
| HEY1    | NM_001040708 | All |
| MRPS28  | NM_014018    | All |
| FABP4   | NM_001442    | All |
| CA1     | NM_001128831 | All |
| CA2     | NM_000067    | All |
| CNGB3   | NM_019098    | All |
| NBN     | NM_002485    | All |
| DECR1   | NM_001359    | All |
| TMEM67  | NM_153704    | All |
| PDP1    | NM_001161780 | All |
| RAD54B  | NM_012415    | All |
| NDUFAF6 | NM_152416    | All |
| C8orf37 | NM_177965    | All |
| GDF6    | NM_001001557 | All |
| UQCRB   | NM_001254752 | All |
| PTDSS1  | NM_014754    | All |
| POP1    | NM_001145861 | All |
| STK3    | NM_006281    | All |
| VPS13B  | NM_017890    | All |
| COX6C   | NM_004374    | All |
| SPAG1   | NM_172218    | All |
| SNX31   | NM_152628    | All |
| GRHL2   | NM_024915    | All |
| NCALD   | NM_001040627 | All |
| RRM2B   | NM_001172477 | All |
| KLF10   | NM_005655    | All |
| BAALC   | NM_024812    | All |
| FZD6    | NM_001164615 | All |
| CTHRC1  | NM_138455    | All |

|           |              |     |
|-----------|--------------|-----|
| SLC25A32  | NM_030780    | All |
| DCAF13    | NM_015420    | All |
| DPYS      | NM_001385    | All |
| ZFPM2     | NM_012082    | All |
| ANGPT1    | NM_001146    | All |
| TRHR      | NM_003301    | All |
| EBAG9     | NM_198120    | All |
| CSMD3     | NM_198123    | All |
| TRPS1     | NM_014112    | All |
| EIF3H     | NM_003756    | All |
| RAD21     | NM_006265    | All |
| SLC30A8   | NM_173851    | All |
| EXT1      | NM_000127    | All |
| TNFRSF11B | NM_002546    | All |
| TAF2      | NM_003184    | All |
| COL14A1   | NM_021110    | All |
| MRPL13    | NM_014078    | All |
| RNF139    | NM_007218    | All |
| NDUFB9    | NM_005005    | All |
| WASHC5    | NM_014846    | All |
| TRIB1     | NM_025195    | All |
| MYC       | NM_002467    | All |
| EFR3A     | NM_015137    | All |
| KCNQ3     | NM_004519    | All |
| LRRC6     | NM_012472    | All |
| TG        | NM_003235    | All |
| NDRG1     | NM_006096    | All |
| ZFAT      | NM_020863    | All |
| KCNK9     | NM_001282534 | All |
| TRAPPC9   | NM_031466    | All |
| AGO2      | NM_012154    | All |
| ARC       | NM_015193    | All |
| JRK       | NM_001077527 | All |
| SLURP1    | NM_020427    | All |
| LY6E      | NM_002346    | All |
| GPIHBP1   | NM_178172    | All |
| TOP1MT    | NM_052963    | All |
| ZC3H3     | NM_015117    | All |
| NAPRT     | NM_145201    | All |
| PYCR3     | NM_023078    | All |
| FAM83H    | NM_198488    | All |
| SCRIB     | NM_182706    | All |
| EPPK1     | NM_031308    | All |
| PLEC      | NM_201380    | All |
| OPLAH     | NM_017570    | All |

|         |              |     |
|---------|--------------|-----|
| CYC1    | NM_001916    | All |
| DGAT1   | NM_012079    | All |
| FBXL6   | NM_012162    | All |
| SLC52A2 | NM_024531    | All |
| SLC39A4 | NM_130849    | All |
| FOXH1   | NM_003923    | All |
| GPT     | NM_005309    | All |
| RECQL4  | NM_004260    | All |
| DOCK8   | NM_203447    | All |
| KANK1   | NM_015158    | All |
| DMRT1   | NM_021951    | All |
| DMRT2   | NM_181872    | All |
| SMARCA2 | NM_003070    | All |
| VLDLR   | NM_003383    | All |
| KCNV2   | NM_133497    | All |
| GLIS3   | NM_001042413 | All |
| SLC1A1  | NM_004170    | All |
| JAK2    | NM_004972    | All |
| INSL6   | NM_007179    | All |
| RIC1    | NM_020829    | All |
| GLDC    | NM_000170    | All |
| KDM4C   | NM_015061    | All |
| PTPRD   | NM_002839    | All |
| TYRP1   | NM_000550    | All |
| MPDZ    | NM_003829    | All |
| CER1    | NM_005454    | All |
| FREM1   | NM_144966    | All |
| BNC2    | NM_017637    | All |
| SLC24A2 | NM_020344    | All |
| MLLT3   | NM_004529    | All |
| KLHL9   | NM_018847    | All |
| MTAP    | NM_002451    | All |
| CDKN2A  | NM_000077    | All |
| CDKN2B  | NM_004936    | All |
| ELAVL2  | NM_004432    | All |
| TEK     | NM_000459    | All |
| C9orf72 | NM_018325    | All |
| DDX58   | NM_014314    | All |
| TOPORS  | NM_005802    | All |
| NDUFB6  | NM_002493    | All |
| TAF1L   | NM_153809    | All |
| APTX    | NM_001195248 | All |
| B4GALT1 | NM_001497    | All |
| AQP3    | NM_004925    | All |
| DNAI1   | NM_012144    | All |

|          |              |     |
|----------|--------------|-----|
| SIGMAR1  | NM_005866    | All |
| GALT     | NM_000155    | All |
| IL11RA   | NM_001142784 | All |
| VCP      | NM_007126    | All |
| FANCG    | NM_004629    | All |
| PIGO     | NM_032634    | All |
| CD72     | NM_001782    | All |
| TPM2     | NM_213674    | All |
| TLN1     | NM_006289    | All |
| GBA2     | NM_020944    | All |
| NPR2     | NM_003995    | All |
| GNE      | NM_001128227 | All |
| PAX5     | NM_016734    | All |
| GRHPR    | NM_012203    | All |
| FBXO10   | NM_012166    | All |
| EXOSC3   | NM_016042    | All |
| ALDH1B1  | NM_000692    | All |
| PIP5K1B  | NM_003558    | All |
| FXN      | NM_000144    | All |
| TJP2     | NM_001170416 | All |
| FAM189A2 | NM_001127608 | All |
| TRPM3    | NM_001007471 | All |
| CEMIP2   | NM_013390    | All |
| GDA      | NM_001242505 | All |
| TMC1     | NM_138691    | All |
| ALDH1A1  | NM_000689    | All |
| TRPM6    | NM_001177311 | All |
| VPS13A   | NM_033305    | All |
| GNA14    | NM_004297    | All |
| GNAQ     | NM_002072    | All |
| RMI1     | NM_024945    | All |
| SLC28A3  | NM_001199633 | All |
| NTRK2    | NM_006180    | All |
| GAS1     | NM_002048    | All |
| DAPK1    | NM_004938    | All |
| SECISBP2 | NM_024077    | All |
| AUH      | NM_001698    | All |
| ROR2     | NM_004560    | All |
| SPTLC1   | NM_006415    | All |
| ASPN     | NM_017680    | All |
| ECM2     | NM_001393    | All |
| BICD2    | NM_001003800 | All |
| FGD3     | NM_033086    | All |
| NINJ1    | NM_004148    | All |
| FBP2     | NM_003837    | All |

|             |              |     |
|-------------|--------------|-----|
| FBP1        | NM_000507    | All |
| FANCC       | NM_000136    | All |
| PTCH1       | NM_000264    | All |
| HSD17B3     | NM_000197    | All |
| TDRD7       | NM_014290    | All |
| XPA         | NM_000380    | All |
| FOXE1       | NM_004473    | All |
| ANKS6       | NM_173551    | All |
| GALNT12     | NM_024642    | All |
| TGFBR1      | NM_004612    | All |
| ALG2        | NM_033087    | All |
| NR4A3       | NM_006981    | All |
| INVS        | NM_014425    | All |
| CAVIN4      | NM_001018116 | All |
| BAAT        | NM_001127610 | All |
| ALDOB       | NM_000035    | All |
| GRIN3A      | NM_133445    | All |
| NIPSNAP3A   | NM_015469    | All |
| ABCA1       | NM_005502    | All |
| FKTN        | NM_006731    | All |
| RAD23B      | NM_002874    | All |
| ELP1        | NM_003640    | All |
| PALM2-AKAP2 | NM_007203    | All |
| AKAP2       | NM_001198656 | All |
| MUSK        | NM_005592    | All |
| LPAR1       | NM_001401    | All |
| SLC31A1     | NM_001859    | All |
| ALAD        | NM_000031    | All |
| WHRN        | NM_015404    | All |
| TNFSF15     | NM_005118    | All |
| TNFSF8      | NM_001244    | All |
| TNC         | NM_002160    | All |
| 43435       | NM_017418    | All |
| PAPPA       | NM_002581    | All |
| ASTN2       | NM_014010    | All |
| TRIM32      | NM_001099679 | All |
| TLR4        | NM_138554    | All |
| CDK5RAP2    | NM_018249    | All |
| C5          | NM_001735    | All |
| GSN         | NM_000177    | All |
| TTLL11      | NM_001139442 | All |
| NDUFA8      | NM_014222    | All |
| MRRF        | NM_138777    | All |
| PTGS1       | NM_000962    | All |
| NR5A1       | NM_004959    | All |

|          |              |     |
|----------|--------------|-----|
| PPP6C    | NM_002721    | All |
| LMX1B    | NM_001174147 | All |
| LRSAM1   | NM_001005374 | All |
| STXBP1   | NM_003165    | All |
| PTRH1    | NM_001002913 | All |
| FPGS     | NM_004957    | All |
| ENG      | NM_001114753 | All |
| AK1      | NM_000476    | All |
| DPM2     | NM_003863    | All |
| PTGES2   | NM_025072    | All |
| CIZ1     | NM_001257975 | All |
| COQ4     | NM_016035    | All |
| SLC27A4  | NM_005094    | All |
| GLE1     | NM_001003722 | All |
| SPTAN1   | NM_001130438 | All |
| WDR34    | NM_052844    | All |
| PKN3     | NM_013355    | All |
| LRRC8A   | NM_001127245 | All |
| DOLK     | NM_014908    | All |
| CRAT     | NM_000755    | All |
| TOR1A    | NM_000113    | All |
| NCS1     | NM_014286    | All |
| ABL1     | NM_007313    | All |
| LAMC3    | NM_006059    | All |
| NUP214   | NM_005085    | All |
| POMT1    | NM_007171    | All |
| RAPGEF1  | NM_198679    | All |
| NTNG2    | NM_032536    | All |
| SETX     | NM_015046    | All |
| TTF1     | NM_007344    | All |
| TSC1     | NM_000368    | All |
| GFI1B    | NM_004188    | All |
| RALGDS   | NM_001271775 | All |
| GBGT1    | NM_021996    | All |
| ABO      | NM_020469    | All |
| SURF1    | NM_003172    | All |
| ADAMTS13 | NM_139025    | All |
| SLC2A6   | NM_017585    | All |
| ADAMTSL2 | NM_014694    | All |
| DBH      | NM_000787    | All |
| SARDH    | NM_001134707 | All |
| RXRA     | NM_002957    | All |
| COL5A1   | NM_001278074 | All |
| FCN2     | NM_004108    | All |
| FCN1     | NM_002003    | All |



|         |              |     |
|---------|--------------|-----|
| MRPS2   | NM_016034    | All |
| SOHLH1  | NM_001101677 | All |
| KCNT1   | NM_020822    | All |
| LHX3    | NM_014564    | All |
| CARD9   | NM_052813    | All |
| SNAPC4  | NM_003086    | All |
| PMPCA   | NM_015160    | All |
| INPP5E  | NM_019892    | All |
| NOTCH1  | NM_017617    | All |
| AGPAT2  | NM_006412    | All |
| LCN10   | NM_001001712 | All |
| C8G     | NM_000606    | All |
| PTGDS   | NM_000954    | All |
| ABCA2   | NM_001606    | All |
| FUT7    | NM_004479    | All |
| MAN1B1  | NM_016219    | All |
| GRIN1   | NM_001185090 | All |
| TPRN    | NM_001128228 | All |
| NDOR1   | NM_001144026 | All |
| SLC34A3 | NM_080877    | All |
| NSMF    | NM_001130969 | All |
| MRPL41  | NM_032477    | All |
| EHMT1   | NM_024757    | All |
| ZMYND11 | NM_001202468 | All |
| DIP2C   | NM_014974    | All |
| KLF6    | NM_001300    | All |
| AKR1C4  | NM_001818    | All |
| TUBAL3  | NM_024803    | All |
| NET1    | NM_001047160 | All |
| FBH1    | NM_032807    | All |
| IL2RA   | NM_000417    | All |
| ATP5F1C | NM_001001973 | All |
| GATA3   | NM_001002295 | All |
| DHTKD1  | NM_018706    | All |
| OPTN    | NM_021980    | All |
| PHYH    | NM_006214    | All |
| DCLRE1C | NM_001033855 | All |
| NMT2    | NM_004808    | All |
| ITGA8   | NM_003638    | All |
| CUBN    | NM_001081    | All |
| VIM     | NM_003380    | All |
| HACD1   | NM_014241    | All |
| CACNB2  | NM_201596    | All |
| NEBL    | NM_006393    | All |
| MLLT10  | NM_001195626 | All |

|             |              |     |
|-------------|--------------|-----|
| COMMD3-BMI1 | NM_001204062 | All |
| BMI1        | NM_005180    | All |
| SPAG6       | NM_012443    | All |
| PIP4K2A     | NM_005028    | All |
| PTF1A       | NM_178161    | All |
| MYO3A       | NM_017433    | All |
| GAD2        | NM_001134366 | All |
| PDSS1       | NM_014317    | All |
| ANKRD26     | NM_014915    | All |
| MASTL       | NM_001172303 | All |
| ACBD5       | NM_145698    | All |
| PTCHD3      | NM_001034842 | All |
| RAB18       | NM_001256410 | All |
| MPP7        | NM_173496    | All |
| WAC         | NM_016628    | All |
| JCAD        | NM_020848    | All |
| MTPAP       | NM_018109    | All |
| MAP3K8      | NM_001244134 | All |
| ZEB1        | NM_001174096 | All |
| KIF5B       | NM_004521    | All |
| RET         | NM_020975    | All |
| CXCL12      | NM_001178134 | All |
| RASSF4      | NM_032023    | All |
| ALOX5       | NM_000698    | All |
| GPRIN2      | NM_014696    | All |
| RBP3        | NM_002900    | All |
| WDFY4       | NM_020945    | All |
| ERCC6       | NM_000124    | All |
| CHAT        | NM_020549    | All |
| MSMB        | NM_002443    | All |
| PRKG1       | NM_006258    | All |
| CSTF2T      | NM_015235    | All |
| DKK1        | NM_012242    | All |
| MBL2        | NM_000242    | All |
| PCDH15      | NM_001142771 | All |
| TFAM        | NM_003201    | All |
| BICC1       | NM_001080512 | All |
| CCDC6       | NM_005436    | All |
| ANK3        | NM_020987    | All |
| ZNF365      | NM_199451    | All |
| EGR2        | NM_000399    | All |
| JMJD1C      | NM_032776    | All |
| CTNNA3      | NM_013266    | All |
| SIRT1       | NM_012238    | All |

|          |              |     |
|----------|--------------|-----|
| MYPN     | NM_001256267 | All |
| ATOH7    | NM_145178    | All |
| PBLD     | NM_022129    | All |
| HNRNPH3  | NM_012207    | All |
| DNA2     | NM_001080449 | All |
| SLC25A16 | NM_152707    | All |
| TET1     | NM_030625    | All |
| KIF1BP   | NM_015634    | All |
| HK1      | NM_033497    | All |
| NEUROG3  | NM_020999    | All |
| NODAL    | NM_018055    | All |
| PRF1     | NM_005041    | All |
| PCBD1    | NM_000281    | All |
| TRNT1    | NM_018344    | All |
| CDH23    | NM_022124    | All |
| PSAP     | NM_002778    | All |
| CHST3    | NM_004273    | All |
| ASCC1    | NM_001198799 | All |
| MCU      | NM_138357    | All |
| MRPS16   | NM_016065    | All |
| CAMK2G   | NM_172171    | All |
| PLAU     | NM_002658    | All |
| C10orf55 | NM_001001791 | All |
| VCL      | NM_014000    | All |
| ADK      | NM_006721    | All |
| KAT6B    | NM_012330    | All |
| LRMDA    | NM_032024    | All |
| KCNMA1   | NM_001161352 | All |
| DLG5     | NM_004747    | All |
| POLR3A   | NM_007055    | All |
| RPS24    | NM_001142285 | All |
| SFTPD    | NM_003019    | All |
| ANXA11   | NM_001157    | All |
| MAT1A    | NM_000429    | All |
| NRG3     | NM_001010848 | All |
| CDHR1    | NM_033100    | All |
| RGR      | NM_002921    | All |
| GRID1    | NM_017551    | All |
| OPN4     | NM_001030015 | All |
| LDB3     | NM_007078    | All |
| BMPR1A   | NM_004329    | All |
| MINPP1   | NM_004897    | All |
| PAPSS2   | NM_004670    | All |
| KLLN     | NM_001126049 | All |
| RNLS     | NM_001031709 | All |

|          |              |     |
|----------|--------------|-----|
| LIPN     | NM_001102469 | All |
| ACTA2    | NM_001613    | All |
| FAS      | NM_000043    | All |
| LIPA     | NM_001127605 | All |
| SLC16A12 | NM_213606    | All |
| HTR7     | NM_019859    | All |
| ANKRD1   | NM_014391    | All |
| PPP1R3C  | NM_005398    | All |
| BTAF1    | NM_003972    | All |
| IDE      | NM_004969    | All |
| KIF11    | NM_004523    | All |
| HHEX     | NM_002729    | All |
| CYP26C1  | NM_183374    | All |
| CYP26A1  | NM_000783    | All |
| FFAR4    | NM_181745    | All |
| RBP4     | NM_006744    | All |
| PDE6C    | NM_006204    | All |
| FRA10AC1 | NM_145246    | All |
| LGI1     | NM_005097    | All |
| PLCE1    | NM_016341    | All |
| CYP2C8   | NM_000770    | All |
| SORBS1   | NM_001034954 | All |
| ALDH18A1 | NM_002860    | All |
| TCTN3    | NM_015631    | All |
| ENTPD1   | NM_001164178 | All |
| BLNK     | NM_013314    | All |
| HOGA1    | NM_138413    | All |
| ZFYVE27  | NM_144588    | All |
| HPS1     | NM_000195    | All |
| HPSE2    | NM_021828    | All |
| GOT1     | NM_002079    | All |
| NKX2-3   | NM_145285    | All |
| SLC25A28 | NM_031212    | All |
| COX15    | NM_078470    | All |
| ABCC2    | NM_000392    | All |
| CPN1     | NM_001308    | All |
| CHUK     | NM_001278    | All |
| NDUFB8   | NM_005004    | All |
| HIF1AN   | NM_017902    | All |
| PAX2     | NM_003990    | All |
| SEMA4G   | NM_017893    | All |
| MRPL43   | NM_176794    | All |
| TWINK    | NM_021830    | All |
| PDZD7    | NM_001195263 | All |
| TLX1     | NM_005521    | All |

|         |              |     |
|---------|--------------|-----|
| BTRC    | NM_033637    | All |
| POLL    | NM_001174084 | All |
| FBXW4   | NM_022039    | All |
| OGA     | NM_012215    | All |
| HPS6    | NM_024747    | All |
| PITX3   | NM_005029    | All |
| NFKB2   | NM_001077494 | All |
| SUFU    | NM_016169    | All |
| CYP17A1 | NM_000102    | All |
| AS3MT   | NM_020682    | All |
| CNNM2   | NM_017649    | All |
| CALHM1  | NM_001001412 | All |
| COL17A1 | NM_000494    | All |
| GSTO1   | NM_004832    | All |
| GSTO2   | NM_183239    | All |
| SORCS1  | NM_001013031 | All |
| SMNDC1  | NM_005871    | All |
| SMC3    | NM_005445    | All |
| RBM20   | NM_001134363 | All |
| BBIP1   | NM_001195306 | All |
| SHOC2   | NM_007373    | All |
| ADRA2A  | NM_000681    | All |
| GPAM    | NM_001244949 | All |
| ACSL5   | NM_016234    | All |
| TCF7L2  | NM_001146274 | All |
| HABP2   | NM_004132    | All |
| ADRB1   | NM_000684    | All |
| ATRNL1  | NM_207303    | All |
| GFRA1   | NM_005264    | All |
| PNLIP   | NM_000936    | All |
| VAX1    | NM_001112704 | All |
| KCNK18  | NM_181840    | All |
| SLC18A2 | NM_003054    | All |
| EMX2    | NM_004098    | All |
| PRLHR   | NM_004248    | All |
| SFXN4   | NM_213649    | All |
| GRK5    | NM_005308    | All |
| TIAL1   | NM_001033925 | All |
| BAG3    | NM_004281    | All |
| WDR11   | NM_018117    | All |
| FGFR2   | NM_022970    | All |
| ARMS2   | NM_001099667 | All |
| HTRA1   | NM_002775    | All |
| ACADSB  | NM_001609    | All |
| HMX2    | NM_005519    | All |

|            |              |     |
|------------|--------------|-----|
| EDRF1      | NM_001202438 | All |
| UROS       | NM_000375    | All |
| ADAM12     | NM_003474    | All |
| MGMT       | NM_002412    | All |
| UTF1       | NM_003577    | All |
| ECHS1      | NM_004092    | All |
| SPRN       | NM_001012508 | All |
| CYP2E1     | NM_000773    | All |
| SIRT3      | NM_012239    | All |
| IFITM5     | NM_001025295 | All |
| HRAS       | NM_001130442 | All |
| IRF7       | NM_001572    | All |
| DRD4       | NM_000797    | All |
| DEAF1      | NM_021008    | All |
| TALDO1     | NM_006755    | All |
| SLC25A22   | NM_001191061 | All |
| PNPLA2     | NM_020376    | All |
| CD151      | NM_001039490 | All |
| MUC5B      | NM_002458    | All |
| BRSK2      | NM_001256630 | All |
| CTSD       | NM_001909    | All |
| TNNI2      | NM_001145841 | All |
| TNNT3      | NM_001042781 | All |
| MRPL23     | NM_021134    | All |
| HOTS       | NM_001293171 | All |
| IGF2       | NM_001127598 | All |
| INS-IGF2   | NM_001042376 | All |
| INS        | NM_000207    | All |
| TH         | NM_199292    | All |
| CD81       | NM_004356    | All |
| TSSC4      | NM_005706    | All |
| KCNQ1      | NM_000218    | All |
| CDKN1C     | NM_000076    | All |
| SLC22A18AS | NM_007105    | All |
| PHLDA2     | NM_003311    | All |
| PGAP2      | NM_001256236 | All |
| RHOG       | NM_001665    | All |
| STIM1      | NM_001277961 | All |
| RRM1       | NM_001033    | All |
| TRIM21     | NM_003141    | All |
| HBB        | NM_000518    | All |
| HBD        | NM_000519    | All |
| HBE1       | NM_005330    | All |
| TRIM5      | NM_033034    | All |
| TRIM22     | NM_006074    | All |

|         |              |     |
|---------|--------------|-----|
| CCKBR   | NM_176875    | All |
| SMPD1   | NM_000543    | All |
| APBB1   | NM_145689    | All |
| ILK     | NM_004517    | All |
| TPP1    | NM_000391    | All |
| DCHS1   | NM_003737    | All |
| MRPL17  | NM_022061    | All |
| NLRP14  | NM_176822    | All |
| RBMXL2  | NM_014469    | All |
| SYT9    | NM_175733    | All |
| STK33   | NM_030906    | All |
| ST5     | NM_213618    | All |
| SCUBE2  | NM_020974    | All |
| SBF2    | NM_030962    | All |
| ADM     | NM_001124    | All |
| AMPD3   | NM_000480    | All |
| GALNT18 | NM_198516    | All |
| DKK3    | NM_015881    | All |
| TEAD1   | NM_021961    | All |
| PTH     | NM_000315    | All |
| PDE3B   | NM_000922    | All |
| CYP2R1  | NM_024514    | All |
| CALCA   | NM_001033952 | All |
| SOX6    | NM_001145819 | All |
| KCNJ11  | NM_000525    | All |
| ABCC8   | NM_000352    | All |
| USH1C   | NM_153676    | All |
| OTOG    | NM_001277269 | All |
| TPH1    | NM_004179    | All |
| HPS5    | NM_181507    | All |
| GTF2H1  | NM_005316    | All |
| TSG101  | NM_006292    | All |
| CSRP3   | NM_003476    | All |
| NAV2    | NM_001244963 | All |
| PRMT3   | NM_005788    | All |
| SLC6A5  | NM_004211    | All |
| NELL1   | NM_006157    | All |
| ANO5    | NM_213599    | All |
| FANCF   | NM_022725    | All |
| ANO3    | NM_031418    | All |
| BDNF    | NM_001143810 | All |
| KIF18A  | NM_031217    | All |
| FSHB    | NM_001018080 | All |
| ARL14EP | NM_152316    | All |
| ELP4    | NM_019040    | All |

|          |              |     |
|----------|--------------|-----|
| PAX6     | NM_001258462 | All |
| WT1      | NM_024426    | All |
| CD59     | NM_001127223 | All |
| CAT      | NM_001752    | All |
| PDHX     | NM_003477    | All |
| CD44     | NM_000610    | All |
| SLC1A2   | NM_004171    | All |
| RAG1     | NM_000448    | All |
| RAG2     | NM_000536    | All |
| ACCS     | NM_001127219 | All |
| EXT2     | NM_000401    | All |
| ALX4     | NM_021926    | All |
| CD82     | NM_002231    | All |
| CHST1    | NM_003654    | All |
| SLC35C1  | NM_001145266 | All |
| MAPK8IP1 | NM_005456    | All |
| PEX16    | NM_057174    | All |
| LARGE2   | NM_152312    | All |
| F2       | NM_000506    | All |
| LRP4     | NM_002334    | All |
| DDB2     | NM_000107    | All |
| ACP2     | NM_001610    | All |
| NR1H3    | NM_005693    | All |
| MADD     | NM_003682    | All |
| MYBPC3   | NM_000256    | All |
| SPI1     | NM_001080547 | All |
| SLC39A13 | NM_001128225 | All |
| RAPSN    | NM_005055    | All |
| NDUFS3   | NM_004551    | All |
| MTCH2    | NM_014342    | All |
| PTPRJ    | NM_002843    | All |
| APLNR    | NM_005161    | All |
| SERPING1 | NM_000062    | All |
| CTNND1   | NM_001085458 | All |
| CNTF     | NM_000614    | All |
| FAM111B  | NM_198947    | All |
| FAM111A  | NM_022074    | All |
| MRPL16   | NM_017840    | All |
| GIF      | NM_005142    | All |
| TCN1     | NM_001062    | All |
| MS4A3    | NM_006138    | All |
| MS4A2    | NM_000139    | All |
| MS4A6A   | NM_001247999 | All |
| MS4A6E   | NM_139249    | All |
| MS4A1    | NM_021950    | All |



|          |              |     |
|----------|--------------|-----|
| MS4A12   | NM_017716    | All |
| PTGDR2   | NM_004778    | All |
| CD5      | NM_014207    | All |
| DDB1     | NM_001923    | All |
| TMEM138  | NM_016464    | All |
| TMEM216  | NM_001173991 | All |
| SDHAF2   | NM_017841    | All |
| FADS2    | NM_004265    | All |
| BEST1    | NM_001139443 | All |
| SCGB1D2  | NM_006551    | All |
| SCGB1A1  | NM_003357    | All |
| ROM1     | NM_000327    | All |
| B3GAT3   | NM_012200    | All |
| BSCL2    | NM_001122955 | All |
| CHRM1    | NM_000738    | All |
| SLC22A6  | NM_004790    | All |
| SLC22A8  | NM_004254    | All |
| SLC22A9  | NM_080866    | All |
| LGALS12  | NM_001142535 | All |
| COX8A    | NM_004074    | All |
| FERMT3   | NM_031471    | All |
| SLC22A11 | NM_018484    | All |
| SLC22A12 | NM_001276326 | All |
| NRXN2    | NM_015080    | All |
| RASGRP2  | NM_001098670 | All |
| PYGM     | NM_005609    | All |
| SF1      | NM_001178030 | All |
| MAP4K2   | NM_004579    | All |
| MEN1     | NM_000244    | All |
| MRPL49   | NM_004927    | All |
| SLC25A45 | NM_182556    | All |
| LTBP3    | NM_001130144 | All |
| SIPA1    | NM_006747    | All |
| RNASEH2C | NM_032193    | All |
| EFEMP2   | NM_016938    | All |
| SART1    | NM_005146    | All |
| CST6     | NM_001323    | All |
| CATSPER1 | NM_053054    | All |
| GAL3ST3  | NM_033036    | All |
| PACS1    | NM_018026    | All |
| B4GAT1   | NM_006876    | All |
| SLC29A2  | NM_001532    | All |
| MRPL11   | NM_016050    | All |
| BBS1     | NM_024649    | All |
| ACTN3    | NM_001258371 | All |

|                   |              |     |
|-------------------|--------------|-----|
| RBM14             | NM_006328    | All |
| SPTBN2            | NM_006946    | All |
| PC                | NM_022172    | All |
| CLCF1             | NM_001166212 | All |
| RAD9A             | NM_004584    | All |
| PTPRCAP           | NM_005608    | All |
| CABP4             | NM_145200    | All |
| AIP               | NM_003977    | All |
| CABP2             | NM_016366    | All |
| GSTP1             | NM_000852    | All |
| NDUFV1            | NM_007103    | All |
| TBX10             | NM_005995    | All |
| ALDH3B2           | NM_001031615 | All |
| ALDH3B1           | NM_001030010 | All |
| NDUFS8            | NM_002496    | All |
| TCIRG1            | NM_006019    | All |
| KMT5B             | NM_017635    | All |
| LRP5              | NM_002335    | All |
| CPT1A             | NM_001876    | All |
| MRPL21            | NM_181514    | All |
| IGHMBP2           | NM_002180    | All |
| TPCN2             | NM_139075    | All |
| CCND1             | NM_053056    | All |
| FGF3              | NM_005247    | All |
| FADD              | NM_003824    | All |
| SHANK2            | NM_012309    | All |
| DHCR7             | NM_001360    | All |
| LRTOMT            | NM_001145308 | All |
| FOLR1             | NM_016725    | All |
| PHOX2A            | NM_005169    | All |
| MRPL48            | NM_016055    | All |
| UCP2              | NM_003355    | All |
| UCP3              | NM_003356    | All |
| KCNE3             | NM_005472    | All |
| SLCO2B1           | NM_007256    | All |
| SERPINH1          | NM_001235    | All |
| MAP6              | NM_033063    | All |
| MOGAT2            | NM_025098    | All |
| CAPN5             | NM_004055    | All |
| MYO7A             | NM_000260    | All |
| NDUFC2-<br>KCTD14 | NM_001203261 | All |
| NDUFC2            | NM_004549    | All |
| ALG8              | NM_024079    | All |
| GAB2              | NM_080491    | All |

|          |              |     |
|----------|--------------|-----|
| NARS2    | NM_024678    | All |
| TENM4    | NM_001098816 | All |
| PRCP     | NM_199418    | All |
| TMEM126A | NM_032273    | All |
| PICALM   | NM_007166    | All |
| FZD4     | NM_012193    | All |
| TMEM135  | NM_022918    | All |
| CTSC     | NM_001814    | All |
| MTNR1B   | NM_005959    | All |
| MED17    | NM_004268    | All |
| MRE11    | NM_005591    | All |
| CEP57    | NM_014679    | All |
| MTMR2    | NM_016156    | All |
| PGR      | NM_000926    | All |
| TRPC6    | NM_004621    | All |
| ANGPTL5  | NM_178127    | All |
| CEP126   | NM_020802    | All |
| YAP1     | NM_001130145 | All |
| MMP7     | NM_002423    | All |
| MMP20    | NM_004771    | All |
| MMP8     | NM_002424    | All |
| MMP10    | NM_002425    | All |
| MMP1     | NM_002421    | All |
| MMP3     | NM_002422    | All |
| MMP12    | NM_002426    | All |
| MMP13    | NM_002427    | All |
| DYNC2H1  | NM_001080463 | All |
| CASP12   | NM_001191016 | All |
| CUL5     | NM_003478    | All |
| ACAT1    | NM_000019    | All |
| NPAT     | NM_002519    | All |
| ATM      | NM_000051    | All |
| EXPH5    | NM_015065    | All |
| RDX      | NM_001260493 | All |
| PPP2R1B  | NM_181699    | All |
| ALG9     | NM_001077690 | All |
| CRYAB    | NM_001885    | All |
| DLAT     | NM_001931    | All |
| IL18     | NM_001562    | All |
| PTS      | NM_000317    | All |
| NCAM1    | NM_001242607 | All |
| ANKK1    | NM_178510    | All |
| DRD2     | NM_000795    | All |
| TMPRSS5  | NM_030770    | All |
| HTR3B    | NM_006028    | All |

|             |              |     |
|-------------|--------------|-----|
| HTR3A       | NM_213621    | All |
| ZBTB16      | NM_001018011 | All |
| NNMT        | NM_006169    | All |
| CADM1       | NM_014333    | All |
| APOA5       | NM_001166598 | All |
| APOA4       | NM_000482    | All |
| APOC3       | NM_000040    | All |
| APOA1       | NM_000039    | All |
| BACE1       | NM_012104    | All |
| CEP164      | NM_014956    | All |
| FXVD2       | NM_001680    | All |
| FXVD6-FXVD2 | NM_001204268 | All |
| FXVD6       | NM_022003    | All |
| IL10RA      | NM_001558    | All |
| TMPRSS4     | NM_019894    | All |
| SCN4B       | NM_174934    | All |
| SCN2B       | NM_004588    | All |
| CD3E        | NM_000733    | All |
| CD3D        | NM_000732    | All |
| CD3G        | NM_000073    | All |
| KMT2A       | NM_001197104 | All |
| TREH        | NM_007180    | All |
| SLC37A4     | NM_001164279 | All |
| HMBS        | NM_000190    | All |
| DPAGT1      | NM_001382    | All |
| NLRX1       | NM_024618    | All |
| CBL         | NM_005188    | All |
| C1QTNF5     | NM_015645    | All |
| MFRP        | NM_031433    | All |
| NECTIN1     | NM_002855    | All |
| ARHGEF12    | NM_015313    | All |
| GRIK4       | NM_014619    | All |
| TECTA       | NM_005422    | All |
| SC5D        | NM_006918    | All |
| SORL1       | NM_003105    | All |
| CLMP        | NM_024769    | All |
| SCN3B       | NM_018400    | All |
| ZNF202      | NM_003455    | All |
| SIAE        | NM_170601    | All |
| ESAM        | NM_138961    | All |
| ROBO3       | NM_022370    | All |
| HEPACAM     | NM_152722    | All |
| FEZ1        | NM_005103    | All |
| CHEK1       | NM_001274    | All |
| HYLS1       | NM_145014    | All |

|          |              |     |
|----------|--------------|-----|
| DDX25    | NM_013264    | All |
| CDON     | NM_001243597 | All |
| FOXRED1  | NM_017547    | All |
| TIRAP    | NM_148910    | All |
| KIRREL3  | NM_032531    | All |
| ETS1     | NM_001143820 | All |
| FLI1     | NM_002017    | All |
| KCNJ1    | NM_000220    | All |
| KCNJ5    | NM_000890    | All |
| TP53AIP1 | NM_001195194 | All |
| ST14     | NM_021978    | All |
| OPCML    | NM_002545    | All |
| JAM3     | NM_032801    | All |
| ACAD8    | NM_014384    | All |
| SLC6A12  | NM_001206931 | All |
| SLC6A13  | NM_016615    | All |
| KDM5A    | NM_001042603 | All |
| WNK1     | NM_001184985 | All |
| RAD52    | NM_134424    | All |
| WNT5B    | NM_032642    | All |
| ADIPOR2  | NM_024551    | All |
| CACNA2D4 | NM_172364    | All |
| DCP1B    | NM_152640    | All |
| CACNA1C  | NM_199460    | All |
| TULP3    | NM_001160408 | All |
| FGF23    | NM_020638    | All |
| NDUFA9   | NM_005002    | All |
| KCNA1    | NM_000217    | All |
| KCNA5    | NM_002234    | All |
| NTF3     | NM_001102654 | All |
| TNFRSF1A | NM_001065    | All |
| SCNN1A   | NM_001159576 | All |
| CD27     | NM_001242    | All |
| VAMP1    | NM_014231    | All |
| MRPL51   | NM_016497    | All |
| NCAPD2   | NM_014865    | All |
| CD4      | NM_000616    | All |
| GNB3     | NM_002075    | All |
| ATN1     | NM_001007026 | All |
| C12orf57 | NM_138425    | All |
| PTPN6    | NM_080548    | All |
| EMG1     | NM_006331    | All |
| C1S      | NM_201442    | All |
| C1R      | NM_001733    | All |
| PEX5     | NM_001131023 | All |

|             |              |     |
|-------------|--------------|-----|
| GDF3        | NM_020634    | All |
| C3AR1       | NM_004054    | All |
| AICDA       | NM_020661    | All |
| A2ML1       | NM_144670    | All |
| A2M         | NM_000014    | All |
| PZP         | NM_002864    | All |
| CLEC2D      | NM_001004419 | All |
| CLEC7A      | NM_197947    | All |
| OLR1        | NM_002543    | All |
| KLRC4-KLRK1 | NM_001199805 | All |
| KLRK1       | NM_007360    | All |
| TAS2R9      | NM_023917    | All |
| TAS2R50     | NM_176890    | All |
| ETV6        | NM_001987    | All |
| LRP6        | NM_002336    | All |
| CDKN1B      | NM_004064    | All |
| GRIN2B      | NM_000834    | All |
| GUCY2C      | NM_004963    | All |
| ART4        | NM_021071    | All |
| MGP         | NM_001190839 | All |
| PDE6H       | NM_006205    | All |
| PTPRO       | NM_030667    | All |
| MGST1       | NM_001260511 | All |
| PIK3C2G     | NM_004570    | All |
| PLCZ1       | NM_033123    | All |
| PDE3A       | NM_000921    | All |
| SLCO1C1     | NM_001145946 | All |
| SLCO1B3     | NM_019844    | All |
| SLCO1B1     | NM_006446    | All |
| SLCO1A2     | NM_021094    | All |
| IAPP        | NM_000415    | All |
| GYS2        | NM_021957    | All |
| LDHB        | NM_002300    | All |
| KCNJ8       | NM_004982    | All |
| ABCC9       | NM_020297    | All |
| SOX5        | NM_006940    | All |
| BCAT1       | NM_001178093 | All |
| KRAS        | NM_033360    | All |
| BHLHE41     | NM_030762    | All |
| MRPS35      | NM_021821    | All |
| PTHLH       | NM_198965    | All |
| BICD1       | NM_001714    | All |
| FGD4        | NM_139241    | All |
| DNM1L       | NM_012062    | All |
| YARS2       | NM_001040436 | All |

|          |              |     |
|----------|--------------|-----|
| PKP2     | NM_004572    | All |
| KIF21A   | NM_001173464 | All |
| LRRK2    | NM_198578    | All |
| CNTN1    | NM_175038    | All |
| PRICKLE1 | NM_001144881 | All |
| IRAK4    | NM_016123    | All |
| ANO6     | NM_001204803 | All |
| VDR      | NM_001017536 | All |
| COL2A1   | NM_001844    | All |
| PFKM     | NM_001166686 | All |
| ADCY6    | NM_015270    | All |
| CCDC65   | NM_033124    | All |
| WNT10B   | NM_003394    | All |
| KMT2D    | NM_003482    | All |
| DHH      | NM_021044    | All |
| PRPH     | NM_006262    | All |
| TROAP    | NM_005480    | All |
| AQP2     | NM_000486    | All |
| AQP5     | NM_001651    | All |
| GPD1     | NM_005276    | All |
| COX14    | NM_001257134 | All |
| DIP2B    | NM_173602    | All |
| ATF1     | NM_005171    | All |
| SLC11A2  | NM_001174125 | All |
| TFCP2    | NM_005653    | All |
| SCN8A    | NM_014191    | All |
| ACVRL1   | NM_001077401 | All |
| ACVR1B   | NM_020328    | All |
| KRT75    | NM_004693    | All |
| KRT5     | NM_000424    | All |
| KRT74    | NM_175053    | All |
| KRT2     | NM_000423    | All |
| KRT1     | NM_006121    | All |
| KRT3     | NM_057088    | All |
| KRT4     | NM_002272    | All |
| SOAT2    | NM_003578    | All |
| C12orf10 | NM_021640    | All |
| AAAS     | NM_015665    | All |
| SP7      | NM_152860    | All |
| AMHR2    | NM_020547    | All |
| HOXC13   | NM_017410    | All |
| SMUG1    | NM_001243788 | All |
| HNRNPA1  | NM_031157    | All |
| PPP1R1A  | NM_006741    | All |
| ITGA7    | NM_001144996 | All |

|          |              |     |
|----------|--------------|-----|
| RDH5     | NM_001199771 | All |
| SUOX     | NM_001032387 | All |
| ERBB3    | NM_001982    | All |
| STAT2    | NM_005419    | All |
| APOF     | NM_001638    | All |
| MIP      | NM_012064    | All |
| ATP5F1B  | NM_001686    | All |
| TAC3     | NM_013251    | All |
| MYO1A    | NM_005379    | All |
| STAT6    | NM_003153    | All |
| LRP1     | NM_002332    | All |
| GLI1     | NM_005269    | All |
| ARHGAP9  | NM_032496    | All |
| MARS     | NM_004990    | All |
| DDIT3    | NM_001195055 | All |
| KIF5A    | NM_004984    | All |
| SLC26A10 | NM_133489    | All |
| B4GALNT1 | NM_001478    | All |
| CDK4     | NM_000075    | All |
| CYP27B1  | NM_000785    | All |
| TSMF     | NM_001172696 | All |
| USP15    | NM_001252078 | All |
| AVPR1A   | NM_000706    | All |
| RXYLT1   | NM_014254    | All |
| TBK1     | NM_013254    | All |
| GNS      | NM_002076    | All |
| LEMD3    | NM_014319    | All |
| MSRB3    | NM_001193461 | All |
| HMGA2    | NM_003483    | All |
| IRAK3    | NM_007199    | All |
| GRIP1    | NM_021150    | All |
| IFNG     | NM_000619    | All |
| MDM2     | NM_002392    | All |
| LYZ      | NM_000239    | All |
| PTPRB    | NM_001109754 | All |
| PTPRR    | NM_002849    | All |
| TPH2     | NM_173353    | All |
| BBS10    | NM_024685    | All |
| PAWR     | NM_002583    | All |
| OTOGL    | NM_173591    | All |
| PTPRQ    | NM_001145026 | All |
| MYF6     | NM_002469    | All |
| ALX1     | NM_006982    | All |
| MGAT4C   | NM_013244    | All |
| CEP290   | NM_025114    | All |



|         |              |     |
|---------|--------------|-----|
| KITLG   | NM_000899    | All |
| DUSP6   | NM_001946    | All |
| KERA    | NM_007035    | All |
| LUM     | NM_002345    | All |
| DCN     | NM_133503    | All |
| MRPL42  | NM_172177    | All |
| CRADD   | NM_003805    | All |
| NDUFA12 | NM_018838    | All |
| HAL     | NM_002108    | All |
| TMPO    | NM_003276    | All |
| SLC25A3 | NM_005888    | All |
| IKBIP   | NM_153687    | All |
| APAF1   | NM_181861    | All |
| ANKS1B  | NM_152788    | All |
| SLC17A8 | NM_139319    | All |
| NR1H4   | NM_001206993 | All |
| MYBPC1  | NM_001254718 | All |
| SYCP3   | NM_001177948 | All |
| GNPTAB  | NM_024312    | All |
| IGF1    | NM_001111285 | All |
| PAH     | NM_000277    | All |
| ASCL1   | NM_004316    | All |
| HSP90B1 | NM_003299    | All |
| WASHC4  | NM_015275    | All |
| NUAK1   | NM_014840    | All |
| POLR3B  | NM_018082    | All |
| SART3   | NM_014706    | All |
| ISCU    | NM_213595    | All |
| SELPLG  | NM_001206609 | All |
| SSH1    | NM_018984    | All |
| DAO     | NM_001917    | All |
| UNG     | NM_080911    | All |
| ACACB   | NM_001093    | All |
| MMAB    | NM_052845    | All |
| MVK     | NM_001114185 | All |
| TRPV4   | NM_021625    | All |
| ATP2A2  | NM_170665    | All |
| TCTN1   | NM_001082538 | All |
| HVCN1   | NM_032369    | All |
| MYL2    | NM_000432    | All |
| CUX2    | NM_015267    | All |
| SH2B3   | NM_005475    | All |
| ATXN2   | NM_002973    | All |
| BRAP    | NM_006768    | All |
| ALDH2   | NM_000690    | All |

|          |              |     |
|----------|--------------|-----|
| OAS1     | NM_016816    | All |
| OAS2     | NM_016817    | All |
| TBX5     | NM_181486    | All |
| TBX3     | NM_016569    | All |
| MED13L   | NM_015335    | All |
| NOS1     | NM_001204218 | All |
| HSPB8    | NM_014365    | All |
| COQ5     | NM_032314    | All |
| ACADS    | NM_000017    | All |
| HNF1A    | NM_000545    | All |
| P2RX7    | NM_002562    | All |
| P2RX4    | NM_001256796 | All |
| CAMKK2   | NM_001270485 | All |
| ORAI1    | NM_032790    | All |
| HPD      | NM_002150    | All |
| WDR66    | NM_144668    | All |
| DIABLO   | NM_019887    | All |
| CLIP1    | NM_001247997 | All |
| ZCCHC8   | NM_017612    | All |
| C12orf65 | NM_152269    | All |
| SBNO1    | NM_001167856 | All |
| EIF2B1   | NM_001414    | All |
| TCTN2    | NM_024809    | All |
| ATP6V0A2 | NM_012463    | All |
| SCARB1   | NM_005505    | All |
| DHX37    | NM_032656    | All |
| PUS1     | NM_025215    | All |
| GALNT9   | NM_001122636 | All |
| P2RX2    | NM_170683    | All |
| POLE     | NM_006231    | All |
| PXMP2    | NM_018663    | All |
| GOLGA3   | NM_005895    | All |
| CHFR     | NM_001161344 | All |
| GJA3     | NM_021954    | All |
| GJB2     | NM_004004    | All |
| GJB6     | NM_001110221 | All |
| CRYL1    | NM_015974    | All |
| FGF9     | NM_002010    | All |
| SGCG     | NM_000231    | All |
| SACS     | NM_014363    | All |
| SPATA13  | NM_001166271 | All |
| CENPJ    | NM_018451    | All |
| ATP8A2   | NM_016529    | All |
| RNF6     | NM_005977    | All |
| WASF3    | NM_006646    | All |

|          |              |     |
|----------|--------------|-----|
| GPR12    | NM_005288    | All |
| RPL21    | NM_000982    | All |
| LNX2     | NM_153371    | All |
| POLR1D   | NM_152705    | All |
| PDX1     | NM_000209    | All |
| FLT3     | NM_004119    | All |
| FLT1     | NM_002019    | All |
| POMP     | NM_015932    | All |
| SLC7A1   | NM_003045    | All |
| ALOX5AP  | NM_001204406 | All |
| B3GLCT   | NM_194318    | All |
| RXFP2    | NM_130806    | All |
| FRY      | NM_023037    | All |
| BRCA2    | NM_000059    | All |
| KL       | NM_004795    | All |
| NBEA     | NM_015678    | All |
| DCLK1    | NM_004734    | All |
| SPART    | NM_015087    | All |
| RFXAP    | NM_000538    | All |
| SMAD9    | NM_001127217 | All |
| CSNK1A1L | NM_145203    | All |
| TRPC4    | NM_003306    | All |
| FREM2    | NM_207361    | All |
| COG6     | NM_020751    | All |
| FOXO1    | NM_002015    | All |
| MRPS31   | NM_005830    | All |
| TNFSF11  | NM_003701    | All |
| SLC25A30 | NM_001010875 | All |
| CPB2     | NM_001872    | All |
| LRCH1    | NM_001164211 | All |
| HTR2A    | NM_000621    | All |
| SUCLA2   | NM_003850    | All |
| ITM2B    | NM_021999    | All |
| RB1      | NM_000321    | All |
| LPAR6    | NM_001162498 | All |
| CYSLTR2  | NM_020377    | All |
| SETDB2   | NM_001160308 | All |
| PHF11    | NM_001040443 | All |
| ARL11    | NM_138450    | All |
| RNASEH2B | NM_024570    | All |
| ATP7B    | NM_000053    | All |
| ALG11    | NM_001004127 | All |
| DIAPH3   | NM_001042517 | All |
| PCDH9    | NM_203487    | All |
| PIBF1    | NM_006346    | All |

|            |              |     |
|------------|--------------|-----|
| KLF5       | NM_001730    | All |
| TBC1D4     | NM_014832    | All |
| CLN5       | NM_006493    | All |
| EDNRB      | NM_001201397 | All |
| SPRY2      | NM_005842    | All |
| SLITRK1    | NM_052910    | All |
| GPC6       | NM_005708    | All |
| ABCC4      | NM_005845    | All |
| SLC15A1    | NM_005073    | All |
| DOCK9      | NM_015296    | All |
| UBAC2      | NM_001144072 | All |
| CLYBL      | NM_206808    | All |
| ZIC2       | NM_007129    | All |
| PCCA       | NM_000282    | All |
| NALCN      | NM_052867    | All |
| FGF14      | NM_175929    | All |
| TPP2       | NM_003291    | All |
| BIVM-ERCC5 | NM_001204425 | All |
| ERCC5      | NM_000123    | All |
| SLC10A2    | NM_000452    | All |
| DAOA       | NM_001161812 | All |
| LIG4       | NM_206937    | All |
| TNFSF13B   | NM_006573    | All |
| IRS2       | NM_003749    | All |
| COL4A1     | NM_001845    | All |
| COL4A2     | NM_001846    | All |
| CARS2      | NM_024537    | All |
| ING1       | NM_005537    | All |
| ARHGEF7    | NM_001113511 | All |
| F7         | NM_000131    | All |
| F10        | NM_000504    | All |
| PROZ       | NM_001256134 | All |
| GRK1       | NM_002929    | All |
| GAS6       | NM_000820    | All |
| PARP2      | NM_005484    | All |
| TEP1       | NM_007110    | All |
| APEX1      | NM_001244249 | All |
| PNP        | NM_000270    | All |
| ANG        | NM_001145    | All |
| RNASE3     | NM_002935    | All |
| RNASE2     | NM_002934    | All |
| RPGRIP1    | NM_020366    | All |
| SUPT16H    | NM_007192    | All |
| CHD8       | NM_001170629 | All |
| SALL2      | NM_005407    | All |

|                   |              |     |
|-------------------|--------------|-----|
| SLC7A7            | NM_001126105 | All |
| MRPL52            | NM_178336    | All |
| MMP14             | NM_004995    | All |
| CEBPE             | NM_001805    | All |
| SLC7A8            | NM_012244    | All |
| BCL2L2            | NM_004050    | All |
| BCL2L2-<br>PABPN1 | NM_001199864 | All |
| PABPN1            | NM_004643    | All |
| SLC22A17          | NM_020372    | All |
| DHRS2             | NM_182908    | All |
| NRL               | NM_006177    | All |
| PCK2              | NM_004563    | All |
| TSSK4             | NM_001184739 | All |
| TINF2             | NM_001099274 | All |
| TGM1              | NM_000359    | All |
| RABGGTA           | NM_182836    | All |
| DHRS1             | NM_001136050 | All |
| RIPK3             | NM_006871    | All |
| NFATC4            | NM_001136022 | All |
| CMA1              | NM_001836    | All |
| CTSG              | NM_001911    | All |
| FOXG1             | NM_005249    | All |
| COCH              | NM_001135058 | All |
| AP4S1             | NM_007077    | All |
| NUBPL             | NM_025152    | All |
| NPAS3             | NM_001164749 | All |
| CFL2              | NM_138638    | All |
| PSMA6             | NM_002791    | All |
| NFKBIA            | NM_020529    | All |
| RALGAPA1          | NM_194301    | All |
| NKX2-1            | NM_001079668 | All |
| PAX9              | NM_006194    | All |
| SLC25A21          | NM_030631    | All |
| MIPOL1            | NM_138731    | All |
| FOXA1             | NM_004496    | All |
| SEC23A            | NM_006364    | All |
| GEMIN2            | NM_003616    | All |
| LRFN5             | NM_152447    | All |
| FSCB              | NM_032135    | All |
| FANCM             | NM_020937    | All |
| MGAT2             | NM_002408    | All |
| DNAAF2            | NM_018139    | All |
| POLE2             | NM_002692    | All |
| L2HGDH            | NM_024884    | All |

|         |              |     |
|---------|--------------|-----|
| MAP4K5  | NM_198794    | All |
| ATL1    | NM_001127713 | All |
| NIN     | NM_020921    | All |
| PYGL    | NM_002863    | All |
| FRMD6   | NM_001267046 | All |
| PTGDR   | NM_000953    | All |
| PTGER2  | NM_000956    | All |
| DDHD1   | NM_001160148 | All |
| BMP4    | NM_130851    | All |
| GCH1    | NM_000161    | All |
| LGALS3  | NM_002306    | All |
| OTX2    | NM_001270525 | All |
| PSMA3   | NM_002788    | All |
| DACT1   | NM_016651    | All |
| DHRS7   | NM_016029    | All |
| SIX6    | NM_007374    | All |
| SIX1    | NM_005982    | All |
| PRKCH   | NM_006255    | All |
| HIF1A   | NM_001530    | All |
| SYNE2   | NM_182914    | All |
| ESR2    | NM_001437    | All |
| MTHFD1  | NM_005956    | All |
| SPTB    | NM_001024858 | All |
| GPX2    | NM_002083    | All |
| MAX     | NM_002382    | All |
| FUT8    | NM_178156    | All |
| GPHN    | NM_020806    | All |
| RDH12   | NM_152443    | All |
| ZFYVE26 | NM_015346    | All |
| RAD51B  | NM_133509    | All |
| ZFP36L1 | NM_001244701 | All |
| SLC10A1 | NM_003049    | All |
| SMOC1   | NM_001034852 | All |
| RGS6    | NM_001204424 | All |
| PSEN1   | NM_000021    | All |
| DNAL1   | NM_031427    | All |
| COQ6    | NM_182476    | All |
| ALDH6A1 | NM_005589    | All |
| VSX2    | NM_182894    | All |
| ABCD4   | NM_005050    | All |
| NPC2    | NM_006432    | All |
| LTBP2   | NM_000428    | All |
| AREL1   | NM_001039479 | All |
| PROX2   | NM_001243007 | All |
| DLST    | NM_001933    | All |

|           |              |     |
|-----------|--------------|-----|
| RPS6KL1   | NM_031464    | All |
| EIF2B2    | NM_014239    | All |
| MLH3      | NM_001040108 | All |
| FLVCR2    | NM_017791    | All |
| TGFB3     | NM_003239    | All |
| IFT43     | NM_001102564 | All |
| ESRRB     | NM_004452    | All |
| POMT2     | NM_013382    | All |
| GSTZ1     | NM_145870    | All |
| VIPAS39   | NM_001193315 | All |
| SPTLC2    | NM_004863    | All |
| NRXN3     | NM_004796    | All |
| DIO2      | NM_013989    | All |
| TSHR      | NM_000369    | All |
| SEL1L     | NM_005065    | All |
| GALC      | NM_000153    | All |
| SPATA7    | NM_018418    | All |
| PTPN21    | NM_007039    | All |
| ZC3H14    | NM_024824    | All |
| TTC8      | NM_144596    | All |
| TDP1      | NM_001008744 | All |
| CALM1     | NM_006888    | All |
| GPR68     | NM_001177676 | All |
| CCDC88C   | NM_001080414 | All |
| FBLN5     | NM_006329    | All |
| TRIP11    | NM_004239    | All |
| ATXN3     | NM_004993    | All |
| NDUFB1    | NM_004545    | All |
| GOLGA5    | NM_005113    | All |
| CHGA      | NM_001275    | All |
| UBR7      | NM_175748    | All |
| SERPINA10 | NM_016186    | All |
| SERPINA6  | NM_001756    | All |
| SERPINA1  | NM_001127700 | All |
| SERPINA3  | NM_001085    | All |
| GSC       | NM_173849    | All |
| DICER1    | NM_030621    | All |
| GLRX5     | NM_016417    | All |
| TCL1A     | NM_021966    | All |
| BDKRB2    | NM_000623    | All |
| VRK1      | NM_003384    | All |
| BCL11B    | NM_138576    | All |
| CYP46A1   | NM_006668    | All |
| YY1       | NM_003403    | All |
| SLC25A29  | NM_001039355 | All |

|          |              |     |
|----------|--------------|-----|
| DYNC1H1  | NM_001376    | All |
| MOK      | NM_014226    | All |
| TECPR2   | NM_014844    | All |
| TRAF3    | NM_003300    | All |
| AMN      | NM_030943    | All |
| CDC42BPB | NM_006035    | All |
| TNFAIP2  | NM_006291    | All |
| XRCC3    | NM_001100118 | All |
| INF2     | NM_022489    | All |
| AKT1     | NM_001014431 | All |
| JAG2     | NM_002226    | All |
| TUBGCP5  | NM_052903    | All |
| NIPA1    | NM_144599    | All |
| MKRN3    | NM_005664    | All |
| MAGEL2   | NM_019066    | All |
| NDN      | NM_002487    | All |
| NPAP1    | NM_018958    | All |
| SNURF    | NM_022804    | All |
| SNRPN    | NM_022805    | All |
| UBE3A    | NM_130839    | All |
| ATP10A   | NM_024490    | All |
| GABRB3   | NM_000814    | All |
| GABRA5   | NM_001165037 | All |
| GABRG3   | NM_033223    | All |
| OCA2     | NM_000275    | All |
| APBA2    | NM_005503    | All |
| FAN1     | NM_014967    | All |
| TRPM1    | NM_001252020 | All |
| GREM1    | NM_013372    | All |
| RYR3     | NM_001036    | All |
| EMC4     | NM_016454    | All |
| SLC12A6  | NM_133647    | All |
| NOP10    | NM_018648    | All |
| GJD2     | NM_020660    | All |
| MEIS2    | NM_170675    | All |
| SPRED1   | NM_152594    | All |
| THBS1    | NM_003246    | All |
| EIF2AK4  | NM_001013703 | All |
| BUB1B    | NM_001211    | All |
| IVD      | NM_002225    | All |
| CHST14   | NM_130468    | All |
| KNL1     | NM_144508    | All |
| NDUFAF1  | NM_016013    | All |
| LTK      | NM_002344    | All |
| SPTBN5   | NM_016642    | All |



|         |              |     |
|---------|--------------|-----|
| CAPN3   | NM_000070    | All |
| CDAN1   | NM_138477    | All |
| TTBK2   | NM_173500    | All |
| UBR1    | NM_174916    | All |
| EPB42   | NM_000119    | All |
| TGM5    | NM_201631    | All |
| TUBGCP4 | NM_014444    | All |
| TP53BP1 | NM_001141980 | All |
| SPG11   | NM_025137    | All |
| B2M     | NM_004048    | All |
| DUOXA2  | NM_207581    | All |
| DUOX1   | NM_175940    | All |
| SLC28A2 | NM_004212    | All |
| GATM    | NM_001482    | All |
| BLOC1S6 | NM_012388    | All |
| SEMA6D  | NM_153618    | All |
| SLC24A5 | NM_205850    | All |
| SLC12A1 | NM_001184832 | All |
| FBN1    | NM_000138    | All |
| CEP152  | NM_001194998 | All |
| HDC     | NM_002112    | All |
| TRPM7   | NM_017672    | All |
| AP4E1   | NM_007347    | All |
| CYP19A1 | NM_000103    | All |
| SCG3    | NM_013243    | All |
| GNB5    | NM_016194    | All |
| MYO5A   | NM_000259    | All |
| WDR72   | NM_182758    | All |
| RAB27A  | NM_183236    | All |
| PIGB    | NM_004855    | All |
| CCPG1   | NM_001204450 | All |
| DNAAF4  | NM_130810    | All |
| MNS1    | NM_018365    | All |
| TCF12   | NM_207037    | All |
| GCOM1   | NM_001285900 | All |
| POLR2M  | NM_015532    | All |
| ALDH1A2 | NM_003888    | All |
| LIPC    | NM_000236    | All |
| ADAM10  | NM_001110    | All |
| MYO1E   | NM_004998    | All |
| RORA    | NM_134260    | All |
| TLN2    | NM_015059    | All |
| TPM1    | NM_001018020 | All |
| LACTB   | NM_032857    | All |
| APH1B   | NM_031301    | All |

|         |              |     |
|---------|--------------|-----|
| CA12    | NM_001218    | All |
| PPIB    | NM_000942    | All |
| PIF1    | NM_025049    | All |
| SPG21   | NM_016630    | All |
| MTFMT   | NM_139242    | All |
| KBTBD13 | NM_001101362 | All |
| CILP    | NM_003613    | All |
| SLC24A1 | NM_004727    | All |
| MEGF11  | NM_032445    | All |
| MAP2K1  | NM_002755    | All |
| SNAPC5  | NM_006049    | All |
| SMAD6   | NM_005585    | All |
| SMAD3   | NM_005902    | All |
| AAGAB   | NM_024666    | All |
| CLN6    | NM_017882    | All |
| ITGA11  | NM_001004439 | All |
| NR2E3   | NM_016346    | All |
| PKM     | NM_001206796 | All |
| HEXA    | NM_000520    | All |
| ARIH1   | NM_005744    | All |
| BBS4    | NM_033028    | All |
| HCN4    | NM_005477    | All |
| NPTN    | NM_012428    | All |
| LOXL1   | NM_005576    | All |
| PML     | NM_033238    | All |
| STRA6   | NM_001199042 | All |
| CYP11A1 | NM_000781    | All |
| CYP1A1  | NM_000499    | All |
| CYP1A2  | NM_000761    | All |
| MPI     | NM_002435    | All |
| COX5A   | NM_004255    | All |
| NEIL1   | NM_001256552 | All |
| ETFA    | NM_000126    | All |
| SCAPER  | NM_020843    | All |
| PSTPIP1 | NM_003978    | All |
| CIB2    | NM_006383    | All |
| DNAJA4  | NM_018602    | All |
| HYKK    | NM_001013619 | All |
| CHRNA5  | NM_000745    | All |
| CHRNA3  | NM_000743    | All |
| CHRNA4  | NM_000750    | All |
| MTHFS   | NM_006441    | All |
| BCL2A1  | NM_004049    | All |
| FAH     | NM_000137    | All |
| CEMIP   | NM_018689    | All |

|          |              |     |
|----------|--------------|-----|
| MESD     | NM_015154    | All |
| IL16     | NM_172217    | All |
| AP3B2    | NM_004644    | All |
| HOMER2   | NM_199330    | All |
| ADAMTSL3 | NM_207517    | All |
| NMB      | NM_205858    | All |
| ZNF592   | NM_014630    | All |
| SLC28A1  | NM_004213    | All |
| AKAP13   | NM_006738    | All |
| AGBL1    | NM_152336    | All |
| NTRK3    | NM_001012338 | All |
| MRPL46   | NM_022163    | All |
| MRPS11   | NM_022839    | All |
| ACAN     | NM_013227    | All |
| MFGE8    | NM_005928    | All |
| RLBP1    | NM_000326    | All |
| FANCI    | NM_001113378 | All |
| POLG     | NM_001126131 | All |
| KIF7     | NM_198525    | All |
| PLIN1    | NM_001145311 | All |
| MESP2    | NM_001039958 | All |
| IDH2     | NM_002168    | All |
| IQGAP1   | NM_003870    | All |
| BLM      | NM_000057    | All |
| FURIN    | NM_002569    | All |
| FES      | NM_002005    | All |
| VPS33B   | NM_018668    | All |
| SV2B     | NM_014848    | All |
| SLCO3A1  | NM_013272    | All |
| ST8SIA2  | NM_006011    | All |
| CHD2     | NM_001271    | All |
| RGMA     | NM_001166283 | All |
| IGF1R    | NM_000875    | All |
| SYNM     | NM_145728    | All |
| MEF2A    | NM_005587    | All |
| ADAMTS17 | NM_139057    | All |
| LINS1    | NM_001040616 | All |
| ALDH1A3  | NM_000693    | All |
| LRRK1    | NM_024652    | All |
| CHSY1    | NM_014918    | All |
| SELENOS  | NM_203472    | All |
| MPG      | NM_001015052 | All |
| HBM      | NM_001003938 | All |
| HBQ1     | NM_005331    | All |
| AXIN1    | NM_003502    | All |

|         |              |     |
|---------|--------------|-----|
| MRPL28  | NM_006428    | All |
| TMEM8A  | NM_021259    | All |
| CCDC78  | NM_001031737 | All |
| LMF1    | NM_022773    | All |
| SOX8    | NM_014587    | All |
| SSTR5   | NM_001172560 | All |
| CACNA1H | NM_021098    | All |
| UBE2I   | NM_194260    | All |
| GNPTG   | NM_032520    | All |
| UNKL    | NM_001193388 | All |
| CLCN7   | NM_001287    | All |
| IFT140  | NM_014714    | All |
| MRPS34  | NM_023936    | All |
| IGFALS  | NM_001146006 | All |
| HAGH    | NM_005326    | All |
| NDUFB10 | NM_004548    | All |
| NTHL1   | NM_002528    | All |
| TSC2    | NM_000548    | All |
| ECI1    | NM_001919    | All |
| ABCA3   | NM_001089    | All |
| TBC1D24 | NM_001199107 | All |
| ZNF213  | NM_004220    | All |
| MEFV    | NM_000243    | All |
| SLX4    | NM_032444    | All |
| DNASE1  | NM_005223    | All |
| TRAP1   | NM_016292    | All |
| CREBBP  | NM_004380    | All |
| ADCY9   | NM_001116    | All |
| GLIS2   | NM_032575    | All |
| HMOX2   | NM_002134    | All |
| SEPT12  | NM_144605    | All |
| ROGDI   | NM_024589    | All |
| NAGPA   | NM_016256    | All |
| RBFOX1  | NM_145891    | All |
| TMEM114 | NM_001146336 | All |
| ABAT    | NM_020686    | All |
| PMM2    | NM_000303    | All |
| USP7    | NM_003470    | All |
| GRIN2A  | NM_001134407 | All |
| CIITA   | NM_000246    | All |
| SOCS1   | NM_003745    | All |
| PRM2    | NM_002762    | All |
| PRM1    | NM_002761    | All |
| LITAF   | NM_001136472 | All |
| GSPT1   | NM_002094    | All |

|         |              |     |
|---------|--------------|-----|
| ERCC4   | NM_005236    | All |
| NDE1    | NM_017668    | All |
| MYH11   | NM_001040114 | All |
| ABCC1   | NM_004996    | All |
| XYLT1   | NM_022166    | All |
| RPS15A  | NM_001030009 | All |
| COQ7    | NM_016138    | All |
| GPR139  | NM_001002911 | All |
| GP2     | NM_001502    | All |
| UMOD    | NM_001008389 | All |
| ACSM3   | NM_005622    | All |
| CRYM    | NM_001888    | All |
| UQCRC2  | NM_003366    | All |
| EEF2K   | NM_013302    | All |
| SCNN1G  | NM_001039    | All |
| SCNN1B  | NM_000336    | All |
| COG7    | NM_153603    | All |
| EARS2   | NM_001083614 | All |
| NDUFAB1 | NM_005003    | All |
| PALB2   | NM_024675    | All |
| PRKCB   | NM_002738    | All |
| TNRC6A  | NM_014494    | All |
| SLC5A11 | NM_052944    | All |
| IL4R    | NM_001257406 | All |
| IL21R   | NM_021798    | All |
| CLN3    | NM_001042432 | All |
| TUFM    | NM_003321    | All |
| SH2B1   | NM_001145795 | All |
| ATP2A1  | NM_173201    | All |
| CD19    | NM_001178098 | All |
| KIF22   | NM_007317    | All |
| PRRT2   | NM_001256442 | All |
| SEZ6L2  | NM_001243332 | All |
| KCTD13  | NM_178863    | All |
| DOC2A   | NM_003586    | All |
| ALDOA   | NM_001243177 | All |
| TBX6    | NM_004608    | All |
| CORO1A  | NM_007074    | All |
| SRCAP   | NM_006662    | All |
| PHKG2   | NM_001172432 | All |
| HSD3B7  | NM_025193    | All |
| VKORC1  | NM_024006    | All |
| BCKDK   | NM_005881    | All |
| PRSS8   | NM_002773    | All |
| FUS     | NM_001170937 | All |

|          |              |     |
|----------|--------------|-----|
| TRIM72   | NM_001008274 | All |
| ITGAM    | NM_001145808 | All |
| SLC5A2   | NM_003041    | All |
| AHSP     | NM_016633    | All |
| ORC6     | NM_014321    | All |
| PHKB     | NM_000293    | All |
| ABCC12   | NM_033226    | All |
| ABCC11   | NM_032583    | All |
| ZNF423   | NM_015069    | All |
| NOD2     | NM_022162    | All |
| CYLD     | NM_001042355 | All |
| SALL1    | NM_002968    | All |
| TOX3     | NM_001080430 | All |
| RPGRIP1L | NM_015272    | All |
| FTO      | NM_001080432 | All |
| IRX5     | NM_005853    | All |
| MMP2     | NM_004530    | All |
| SLC6A2   | NM_001172504 | All |
| GNAO1    | NM_138736    | All |
| BBS2     | NM_031885    | All |
| MT3      | NM_005954    | All |
| MT2A     | NM_005953    | All |
| MT1A     | NM_005946    | All |
| SLC12A3  | NM_000339    | All |
| CETP     | NM_000078    | All |
| ARL2BP   | NM_012106    | All |
| CCL22    | NM_002990    | All |
| CCL17    | NM_002987    | All |
| COQ9     | NM_020312    | All |
| ADGRG1   | NM_005682    | All |
| CNGB1    | NM_001297    | All |
| USB1     | NM_024598    | All |
| CSNK2A2  | NM_001896    | All |
| CDH8     | NM_001796    | All |
| CDH5     | NM_001795    | All |
| BEAN1    | NM_001178020 | All |
| TK2      | NM_004614    | All |
| PDP2     | NM_020786    | All |
| CES2     | NM_003869    | All |
| CBFB     | NM_022845    | All |
| TRADD    | NM_003789    | All |
| HSF4     | NM_001040667 | All |
| NOL3     | NM_001185057 | All |
| PLEKHG4  | NM_001129728 | All |
| HSD11B2  | NM_000196    | All |

|          |              |     |
|----------|--------------|-----|
| AGRP     | NM_001138    | All |
| CTCF     | NM_006565    | All |
| PARD6A   | NM_016948    | All |
| LCAT     | NM_000229    | All |
| DUS2     | NM_001271762 | All |
| PRMT7    | NM_019023    | All |
| ZFP90    | NM_133458    | All |
| CDH3     | NM_001793    | All |
| CDH1     | NM_004360    | All |
| UTP4     | NM_032830    | All |
| COG8     | NM_032382    | All |
| NQO1     | NM_000903    | All |
| AARS     | NM_001605    | All |
| COG4     | NM_015386    | All |
| TAT      | NM_000353    | All |
| PHLPP2   | NM_015020    | All |
| DHODH    | NM_001361    | All |
| ZFH3     | NM_006885    | All |
| PSMD7    | NM_002811    | All |
| FA2H     | NM_024306    | All |
| ZNRF1    | NM_032268    | All |
| CHST6    | NM_021615    | All |
| CHST5    | NM_024533    | All |
| KARS     | NM_001130089 | All |
| CNTNAP4  | NM_138994    | All |
| ADAMTS18 | NM_199355    | All |
| WVOX     | NM_016373    | All |
| MAF      | NM_005360    | All |
| BCO1     | NM_017429    | All |
| GAN      | NM_022041    | All |
| PLCG2    | NM_002661    | All |
| HSD17B2  | NM_002153    | All |
| CDH13    | NM_001220488 | All |
| MLYCD    | NM_012213    | All |
| DNAAF1   | NM_178452    | All |
| TAF1C    | NM_001243156 | All |
| KIAA0513 | NM_014732    | All |
| GSE1     | NM_014615    | All |
| COX4I1   | NM_001861    | All |
| IRF8     | NM_002163    | All |
| FOXF1    | NM_001451    | All |
| FOXC2    | NM_005251    | All |
| JPH3     | NM_020655    | All |
| ZNF469   | NM_001127464 | All |
| CYBA     | NM_000101    | All |

|          |              |     |
|----------|--------------|-----|
| CDT1     | NM_030928    | All |
| APRT     | NM_000485    | All |
| GALNS    | NM_000512    | All |
| ACSF3    | NM_001127214 | All |
| CDH15    | NM_004933    | All |
| ANKRD11  | NM_001256183 | All |
| SPG7     | NM_003119    | All |
| DPEP1    | NM_004413    | All |
| CHMP1A   | NM_002768    | All |
| FANCA    | NM_000135    | All |
| MC1R     | NM_002386    | All |
| RPH3AL   | NM_001190411 | All |
| GEMIN4   | NM_015721    | All |
| BHLHA9   | NM_001164405 | All |
| CRK      | NM_016823    | All |
| MYO1C    | NM_001080779 | All |
| PRPF8    | NM_006445    | All |
| WDR81    | NM_001163809 | All |
| SERPINF2 | NM_000934    | All |
| SERPINF1 | NM_002615    | All |
| RPA1     | NM_002945    | All |
| SRR      | NM_021947    | All |
| ASPA     | NM_000049    | All |
| TRPV3    | NM_001258205 | All |
| TRPV1    | NM_018727    | All |
| SHPK     | NM_013276    | All |
| CTNS     | NM_001031681 | All |
| P2RX5    | NM_002561    | All |
| ITGAE    | NM_002208    | All |
| CAMKK1   | NM_172206    | All |
| P2RX1    | NM_002558    | All |
| ATP2A3   | NM_174953    | All |
| CXCL16   | NM_022059    | All |
| PLD2     | NM_002663    | All |
| CHRNE    | NM_000080    | All |
| GP1BA    | NM_000173    | All |
| SLC25A11 | NM_003562    | All |
| PFN1     | NM_005022    | All |
| ENO3     | NM_053013    | All |
| KIF1C    | NM_006612    | All |
| SLC52A1  | NM_017986    | All |
| NLRP1    | NM_033004    | All |
| AIPL1    | NM_014336    | All |
| PITPNM3  | NM_031220    | All |
| ALOX12   | NM_000697    | All |



|           |              |     |
|-----------|--------------|-----|
| ACADVL    | NM_000018    | All |
| SLC2A4    | NM_001042    | All |
| YBX2      | NM_015982    | All |
| NLGN2     | NM_020795    | All |
| CHRN1     | NM_000747    | All |
| TNFSF12   | NM_003809    | All |
| MPDU1     | NM_004870    | All |
| SHBG      | NM_001040    | All |
| TP53      | NM_001276760 | All |
| WRAP53    | NM_001143990 | All |
| DNAH2     | NM_020877    | All |
| KDM6B     | NM_001080424 | All |
| CHD3      | NM_001005271 | All |
| GUCY2D    | NM_000180    | All |
| ALOX12B   | NM_001139    | All |
| ALOXE3    | NM_001165960 | All |
| HES7      | NM_001165967 | All |
| PER1      | NM_002616    | All |
| CTC1      | NM_025099    | All |
| PFAS      | NM_012393    | All |
| RANGRF    | NM_016492    | All |
| SLC25A35  | NM_201520    | All |
| PIK3R5    | NM_014308    | All |
| RCVRN     | NM_002903    | All |
| MYH3      | NM_002470    | All |
| SCO1      | NM_004589    | All |
| DNAH9     | NM_001372    | All |
| MAP2K4    | NM_003010    | All |
| MYOCD     | NM_001146312 | All |
| ELAC2     | NM_001165962 | All |
| PMP22     | NM_153322    | All |
| TTC19     | NM_017775    | All |
| PIGL      | NM_004278    | All |
| TNFRSF13B | NM_012452    | All |
| FLCN      | NM_144997    | All |
| PEMT      | NM_148172    | All |
| RAI1      | NM_030665    | All |
| SREBF1    | NM_001005291 | All |
| ATPAF2    | NM_145691    | All |
| MYO15A    | NM_016239    | All |
| LLGL1     | NM_004140    | All |
| SHMT1     | NM_004169    | All |
| B9D1      | NM_001243473 | All |
| SLC47A1   | NM_018242    | All |
| ALDH3A2   | NM_001031806 | All |

|          |              |     |
|----------|--------------|-----|
| SLC47A2  | NM_001256663 | All |
| ALDH3A1  | NM_001135168 | All |
| AKAP10   | NM_007202    | All |
| VTN      | NM_000638    | All |
| SLC46A1  | NM_080669    | All |
| SLC13A2  | NM_001145975 | All |
| FOXN1    | NM_003593    | All |
| UNC119   | NM_005148    | All |
| KIAA0100 | NM_014680    | All |
| SUPT6H   | NM_003170    | All |
| NEK8     | NM_178170    | All |
| SEZ6     | NM_178860    | All |
| CRYBA1   | NM_005208    | All |
| GIT1     | NM_001085454 | All |
| EFCAB5   | NM_198529    | All |
| SLC6A4   | NM_001045    | All |
| BLMH     | NM_000386    | All |
| RNF135   | NM_032322    | All |
| NF1      | NM_001042492 | All |
| OMG      | NM_002544    | All |
| CDK5R1   | NM_003885    | All |
| CCL2     | NM_002982    | All |
| CCL7     | NM_006273    | All |
| CCL11    | NM_002986    | All |
| CCL13    | NM_005408    | All |
| LIG3     | NM_013975    | All |
| RAD51D   | NM_001142571 | All |
| SLFN5    | NM_144975    | All |
| PEX12    | NM_000286    | All |
| GAS2L2   | NM_139285    | All |
| TAF15    | NM_139215    | All |
| CCL5     | NM_002985    | All |
| PIGW     | NM_178517    | All |
| LHX1     | NM_005568    | All |
| ACACA    | NM_198834    | All |
| HNF1B    | NM_000458    | All |
| GPR179   | NM_001004334 | All |
| TCAP     | NM_003673    | All |
| PNMT     | NM_002686    | All |
| PGAP3    | NM_033419    | All |
| ERBB2    | NM_004448    | All |
| ZPBP2    | NM_199321    | All |
| GSDMB    | NM_001165958 | All |
| ORMDL3   | NM_139280    | All |
| GSDMA    | NM_178171    | All |

|                     |              |     |
|---------------------|--------------|-----|
| THRA                | NM_003250    | All |
| CDC6                | NM_001254    | All |
| RARA                | NM_000964    | All |
| CCR7                | NM_001838    | All |
| SMARCE1             | NM_003079    | All |
| KRT10               | NM_000421    | All |
| KRT12               | NM_000223    | All |
| KRT37               | NM_003770    | All |
| KRT38               | NM_006771    | All |
| KRT13               | NM_153490    | All |
| KRT9                | NM_000226    | All |
| JUP                 | NM_002230    | All |
| FKBP10              | NM_021939    | All |
| KLHL10              | NM_152467    | All |
| ACLY                | NM_001096    | All |
| HCRT                | NM_001524    | All |
| STAT3               | NM_139276    | All |
| CAVIN1              | NM_012232    | All |
| ATP6V0A1            | NM_001130020 | All |
| NAGLU               | NM_000263    | All |
| HSD17B1             | NM_000413    | All |
| COASY               | NM_001042532 | All |
| PSMC3IP             | NM_016556    | All |
| EZH1                | NM_001991    | All |
| WNK4                | NM_032387    | All |
| G6PC                | NM_000151    | All |
| BRCA1               | NM_007300    | All |
| MEOX1               | NM_004527    | All |
| SOST                | NM_025237    | All |
| MPP3                | NM_001932    | All |
| PPY                 | NM_002722    | All |
| PYY                 | NM_004160    | All |
| NAGS                | NM_153006    | All |
| G6PC3               | NM_138387    | All |
| SLC4A1              | NM_000342    | All |
| SLC25A39            | NM_001143780 | All |
| GRN                 | NM_002087    | All |
| ITGA2B              | NM_000419    | All |
| GPATCH8             | NM_001002909 | All |
| EFTUD2              | NM_004247    | All |
| CCDC103             | NM_001258395 | All |
| GFAP                | NM_002055    | All |
| LINC02210-<br>CRHR1 | NM_001256299 | All |
| MAPT                | NM_001123066 | All |

|          |              |     |
|----------|--------------|-----|
| WNT3     | NM_030753    | All |
| GOSR2    | NM_054022    | All |
| CDC27    | NM_001114091 | All |
| ITGB3    | NM_000212    | All |
| TBX21    | NM_013351    | All |
| PNPO     | NM_018129    | All |
| CDK5RAP3 | NM_001278197 | All |
| HOXB1    | NM_002144    | All |
| HOXB6    | NM_018952    | All |
| HOXB13   | NM_006361    | All |
| GIP      | NM_004123    | All |
| NGFR     | NM_002507    | All |
| DLX3     | NM_005220    | All |
| ITGA3    | NM_002204    | All |
| PDK2     | NM_002611    | All |
| SGCA     | NM_000023    | All |
| COL1A1   | NM_000088    | All |
| XYL2     | NM_022167    | All |
| MRPL27   | NM_016504    | All |
| EME1     | NM_001166131 | All |
| CACNA1G  | NM_018896    | All |
| ABCC3    | NM_003786    | All |
| NME1     | NM_198175    | All |
| NOG      | NM_005450    | All |
| DGKE     | NM_003647    | All |
| MRPS23   | NM_016070    | All |
| EPX      | NM_000502    | All |
| MKS1     | NM_017777    | All |
| MPO      | NM_000250    | All |
| TEX14    | NM_001201457 | All |
| RAD51C   | NM_058216    | All |
| TRIM37   | NM_001005207 | All |
| PTRH2    | NM_016077    | All |
| CA4      | NM_000717    | All |
| PPM1D    | NM_003620    | All |
| TBX2     | NM_005994    | All |
| TBX4     | NM_018488    | All |
| BRIP1    | NM_032043    | All |
| MED13    | NM_005121    | All |
| TANC2    | NM_025185    | All |
| ACE      | NM_000789    | All |
| TACO1    | NM_016360    | All |
| STRADA   | NM_001003787 | All |
| CD79B    | NM_001039933 | All |
| SCN4A    | NM_000334    | All |

|          |              |     |
|----------|--------------|-----|
| PECAM1   | NM_000442    | All |
| POLG2    | NM_007215    | All |
| DDX5     | NM_004396    | All |
| RGS9     | NM_003835    | All |
| AXIN2    | NM_004655    | All |
| APOH     | NM_000042    | All |
| PRKCA    | NM_002737    | All |
| PRKAR1A  | NM_212471    | All |
| FAM20A   | NM_017565    | All |
| ABCA10   | NM_080282    | All |
| KCNJ16   | NM_170741    | All |
| KCNJ2    | NM_000891    | All |
| SOX9     | NM_000346    | All |
| SSTR2    | NM_001050    | All |
| COG1     | NM_018714    | All |
| DNAI2    | NM_023036    | All |
| SLC9A3R1 | NM_004252    | All |
| USH1G    | NM_173477    | All |
| NT5C     | NM_014595    | All |
| MRPS7    | NM_015971    | All |
| SLC25A19 | NM_001126122 | All |
| TSEN54   | NM_207346    | All |
| ITGB4    | NM_000213    | All |
| GALK1    | NM_000154    | All |
| UNC13D   | NM_199242    | All |
| MRPL38   | NM_032478    | All |
| ACOX1    | NM_004035    | All |
| AANAT    | NM_001088    | All |
| RHBDF2   | NM_024599    | All |
| SEPT9    | NM_001113491 | All |
| TMC6     | NM_001127198 | All |
| TMC8     | NM_152468    | All |
| BIRC5    | NM_001012271 | All |
| SOCS3    | NM_003955    | All |
| TIMP2    | NM_003255    | All |
| CANT1    | NM_001159773 | All |
| CBX2     | NM_005189    | All |
| CBX4     | NM_003655    | All |
| CCDC40   | NM_017950    | All |
| GAA      | NM_001079804 | All |
| CARD14   | NM_024110    | All |
| SGSH     | NM_000199    | All |
| RNF213   | NM_001256071 | All |
| RPTOR    | NM_020761    | All |
| ACTG1    | NM_001614    | All |

|          |              |     |
|----------|--------------|-----|
| FSCN2    | NM_001077182 | All |
| PDE6G    | NM_002602    | All |
| MRPL12   | NM_002949    | All |
| SLC25A10 | NM_001270953 | All |
| GCGR     | NM_000160    | All |
| P4HB     | NM_000918    | All |
| ARHGDIA  | NM_004309    | All |
| PYCR1    | NM_006907    | All |
| ASPSCR1  | NM_001251888 | All |
| DCXR     | NM_016286    | All |
| GPS1     | NM_004127    | All |
| FASN     | NM_004104    | All |
| SLC16A3  | NM_001206950 | All |
| CSNK1D   | NM_001893    | All |
| WDR45B   | NM_019613    | All |
| FN3K     | NM_022158    | All |
| ZNF750   | NM_024702    | All |
| CLUL1    | NM_199167    | All |
| TYMS     | NM_001071    | All |
| ADCYAP1  | NM_001117    | All |
| SMCHD1   | NM_015295    | All |
| LPIN2    | NM_014646    | All |
| MYOM1    | NM_003803    | All |
| TGIF1    | NM_170695    | All |
| LAMA1    | NM_005559    | All |
| NDUFV2   | NM_021074    | All |
| TWSG1    | NM_020648    | All |
| APCDD1   | NM_153000    | All |
| PIEZO2   | NM_022068    | All |
| GNAL     | NM_182978    | All |
| IMPA2    | NM_014214    | All |
| CIDEA    | NM_001279    | All |
| AFG3L2   | NM_006796    | All |
| PTPN2    | NM_002828    | All |
| LDLRAD4  | NM_181482    | All |
| MC2R     | NM_000529    | All |
| MIB1     | NM_020774    | All |
| GATA6    | NM_005257    | All |
| RBBP8    | NM_002894    | All |
| NPC1     | NM_000271    | All |
| LAMA3    | NM_198129    | All |
| AQP4     | NM_001650    | All |
| DSC3     | NM_001941    | All |
| DSC2     | NM_024422    | All |
| DSG1     | NM_001942    | All |

|           |              |     |
|-----------|--------------|-----|
| DSG4      | NM_177986    | All |
| DSG2      | NM_001943    | All |
| TTR       | NM_000371    | All |
| MEP1B     | NM_005925    | All |
| ASXL3     | NM_030632    | All |
| DTNA      | NM_001390    | All |
| ZNF24     | NM_006965    | All |
| ELP2      | NM_018255    | All |
| MOCOS     | NM_017947    | All |
| CELF4     | NM_020180    | All |
| PIK3C3    | NM_002647    | All |
| SETBP1    | NM_015559    | All |
| SLC14A2   | NM_001242692 | All |
| SLC14A1   | NM_001128588 | All |
| EPG5      | NM_020964    | All |
| LOXHD1    | NM_144612    | All |
| KATNAL2   | NM_031303    | All |
| IER3IP1   | NM_016097    | All |
| SMAD2     | NM_001003652 | All |
| SMAD7     | NM_005904    | All |
| DYM       | NM_017653    | All |
| LIPG      | NM_006033    | All |
| MYO5B     | NM_001080467 | All |
| CFAP53    | NM_145020    | All |
| MBD1      | NM_001204136 | All |
| SMAD4     | NM_005359    | All |
| DCC       | NM_005215    | All |
| TCF4      | NM_001243226 | All |
| FECH      | NM_001012515 | All |
| NARS      | NM_004539    | All |
| ATP8B1    | NM_005603    | All |
| NEDD4L    | NM_001144967 | All |
| MALT1     | NM_006785    | All |
| RAX       | NM_013435    | All |
| LMAN1     | NM_005570    | All |
| CCBE1     | NM_133459    | All |
| PMAIP1    | NM_021127    | All |
| MC4R      | NM_005912    | All |
| PIGN      | NM_176787    | All |
| TNFRSF11A | NM_003839    | All |
| BCL2      | NM_000633    | All |
| SERPINB5  | NM_002639    | All |
| SERPINB11 | NM_080475    | All |
| HMSD      | NM_001123366 | All |
| CD226     | NM_006566    | All |

|          |              |     |
|----------|--------------|-----|
| RTTN     | NM_173630    | All |
| NETO1    | NM_001201465 | All |
| CYB5A    | NM_148923    | All |
| CNDP1    | NM_032649    | All |
| TSHZ1    | NM_005786    | All |
| CTDP1    | NM_004715    | All |
| BSG      | NM_001728    | All |
| ELANE    | NM_001972    | All |
| CFD      | NM_001928    | All |
| KISS1R   | NM_032551    | All |
| ABCA7    | NM_019112    | All |
| ARHGAP45 | NM_001258328 | All |
| POLR2E   | NM_002695    | All |
| GPX4     | NM_001039848 | All |
| STK11    | NM_000455    | All |
| MUM1     | NM_032853    | All |
| NDUFS7   | NM_024407    | All |
| GAMT     | NM_138924    | All |
| RPS15    | NM_001018    | All |
| MBD3     | NM_001281453 | All |
| UQCR11   | NM_006830    | All |
| TCF3     | NM_001136139 | All |
| AMH      | NM_000479    | All |
| OAZ1     | NM_004152    | All |
| LMNB2    | NM_032737    | All |
| GADD45B  | NM_015675    | All |
| GIPC3    | NM_133261    | All |
| TBXA2R   | NM_201636    | All |
| PIP5K1C  | NM_012398    | All |
| MRPL54   | NM_172251    | All |
| RAX2     | NM_032753    | All |
| ATCAY    | NM_033064    | All |
| EEF2     | NM_001961    | All |
| MAP2K2   | NM_030662    | All |
| CREB3L3  | NM_032607    | All |
| TICAM1   | NM_182919    | All |
| RPL36    | NM_033643    | All |
| NRTN     | NM_004558    | All |
| NDUFA11  | NM_001193375 | All |
| RFX2     | NM_000635    | All |
| MLLT1    | NM_005934    | All |
| CLPP     | NM_006012    | All |
| PSPN     | NM_004158    | All |
| SLC25A41 | NM_173637    | All |
| TNFSF14  | NM_003807    | All |



|             |              |     |
|-------------|--------------|-----|
| C3          | NM_000064    | All |
| INSR        | NM_000208    | All |
| MCOLN1      | NM_020533    | All |
| PNPLA6      | NM_001166111 | All |
| PET100      | NM_001171155 | All |
| STXBP2      | NM_001272034 | All |
| RETN        | NM_020415    | All |
| FCER2       | NM_002002    | All |
| CLEC4M      | NM_001144909 | All |
| TIMM44      | NM_006351    | All |
| FBN3        | NM_032447    | All |
| CD320       | NM_016579    | All |
| NDUFA7      | NM_005001    | All |
| ANGPTL4     | NM_139314    | All |
| MYO1F       | NM_012335    | All |
| ADAMTS10    | NM_030957    | All |
| PIN1        | NM_006221    | All |
| OLFM2       | NM_058164    | All |
| PPAN-P2RY11 | NM_001040664 | All |
| P2RY11      | NM_002566    | All |
| DNMT1       | NM_001130823 | All |
| MRPL4       | NM_015956    | All |
| ICAM1       | NM_000201    | All |
| ICAM4       | NM_001039132 | All |
| ICAM5       | NM_003259    | All |
| FDX2        | NM_001031734 | All |
| TYK2        | NM_003331    | All |
| SLC44A2     | NM_020428    | All |
| ILF3        | NM_017620    | All |
| DNM2        | NM_001005361 | All |
| SMARCA4     | NM_001128849 | All |
| LDLR        | NM_000527    | All |
| DOCK6       | NM_020812    | All |
| EPOR        | NM_000121    | All |
| PRKCSH      | NM_002743    | All |
| ECSIT       | NM_016581    | All |
| ACP5        | NM_001111036 | All |
| ZNF627      | NM_145295    | All |
| MAN2B1      | NM_000528    | All |
| TNPO2       | NM_001136196 | All |
| RNASEH2A    | NM_006397    | All |
| DNASE2      | NM_001375    | All |
| KLF1        | NM_006563    | All |
| GCDH        | NM_000159    | All |
| CALR        | NM_004343    | All |

|                  |              |     |
|------------------|--------------|-----|
| NFIX             | NM_001271043 | All |
| LYL1             | NM_005583    | All |
| TRMT1            | NM_001136035 | All |
| CACNA1A          | NM_023035    | All |
| CC2D1A           | NM_017721    | All |
| PRKACA           | NM_002730    | All |
| TECR             | NM_138501    | All |
| NDUFB7           | NM_004146    | All |
| NOTCH3           | NM_000435    | All |
| CYP4F22          | NM_173483    | All |
| CYP4F8           | NM_007253    | All |
| CYP4F12          | NM_023944    | All |
| CYP4F11          | NM_001128932 | All |
| CALR3            | NM_145046    | All |
| MYO9B            | NM_004145    | All |
| MRPL34           | NM_023937    | All |
| NXNL1            | NM_138454    | All |
| SLC27A1          | NM_198580    | All |
| B3GNT3           | NM_014256    | All |
| INSL3            | NM_001265587 | All |
| JAK3             | NM_000215    | All |
| SLC5A5           | NM_000453    | All |
| IL12RB1          | NM_005535    | All |
| PIK3R2           | NM_005027    | All |
| IFI30            | NM_006332    | All |
| GDF15            | NM_004864    | All |
| ISYNA1           | NM_016368    | All |
| ELL              | NM_006532    | All |
| CRLF1            | NM_004750    | All |
| COMP             | NM_000095    | All |
| GDF1             | NM_001492    | All |
| SLC25A42         | NM_178526    | All |
| BORCS8-<br>MEF2B | NM_005919    | All |
| MEF2B            | NM_001145785 | All |
| RFXANK           | NM_003721    | All |
| NCAN             | NM_004386    | All |
| NDUFA13          | NM_015965    | All |
| GMIP             | NM_016573    | All |
| C19orf12         | NM_001031726 | All |
| ZNF507           | NM_014910    | All |
| PDCD5            | NM_004708    | All |
| RGS9BP           | NM_207391    | All |
| SLC7A9           | NM_001243036 | All |
| CEP89            | NM_032816    | All |

|          |              |     |
|----------|--------------|-----|
| SLC7A10  | NM_019849    | All |
| CEBPA    | NM_004364    | All |
| PEPD     | NM_000285    | All |
| CHST8    | NM_001127896 | All |
| GPI      | NM_000175    | All |
| UBA2     | NM_005499    | All |
| SCN1B    | NM_199037    | All |
| HAMP     | NM_021175    | All |
| MAG      | NM_002361    | All |
| CD22     | NM_001771    | All |
| FFAR1    | NM_005303    | All |
| COX6B1   | NM_001863    | All |
| PSENN    | NM_172341    | All |
| HSPB6    | NM_144617    | All |
| NPHS1    | NM_004646    | All |
| TYROBP   | NM_003332    | All |
| SDHAF1   | NM_001042631 | All |
| WDR62    | NM_001083961 | All |
| COX7A1   | NM_001864    | All |
| KCNK6    | NM_004823    | All |
| RYR1     | NM_000540    | All |
| ACTN4    | NM_004924    | All |
| SARS2    | NM_001145901 | All |
| MRPS12   | NM_021107    | All |
| ZFP36    | NM_003407    | All |
| DLL3     | NM_016941    | All |
| LGALS13  | NM_013268    | All |
| AKT2     | NM_001626    | All |
| PRX      | NM_181882    | All |
| SERTAD1  | NM_013376    | All |
| LTBP4    | NM_001042544 | All |
| NUMBL    | NM_004756    | All |
| COQ8B    | NM_024876    | All |
| ITPKC    | NM_025194    | All |
| EGLN2    | NM_053046    | All |
| CYP2S1   | NM_030622    | All |
| AXL      | NM_021913    | All |
| HNRNPUL1 | NM_007040    | All |
| TGFB1    | NM_000660    | All |
| B9D2     | NM_030578    | All |
| EXOSC5   | NM_020158    | All |
| BCKDHA   | NM_000709    | All |
| DMAC2    | NM_001167867 | All |
| RPS19    | NM_001022    | All |
| CD79A    | NM_001783    | All |

|          |              |     |
|----------|--------------|-----|
| ATP1A3   | NM_001256214 | All |
| GRIK5    | NM_002088    | All |
| ZNF526   | NM_133444    | All |
| ERF      | NM_006494    | All |
| CIC      | NM_015125    | All |
| PAFAH1B3 | NM_001145940 | All |
| LIPE     | NM_005357    | All |
| ETHE1    | NM_014297    | All |
| XRCC1    | NM_006297    | All |
| PLAUR    | NM_002659    | All |
| ZNF224   | NM_013398    | All |
| PVR      | NM_006505    | All |
| CEACAM16 | NM_001039213 | All |
| BCL3     | NM_005178    | All |
| BCAM     | NM_005581    | All |
| APOE     | NM_000041    | All |
| APOC4    | NM_001646    | All |
| APOC2    | NM_000483    | All |
| CLPTM1   | NM_001294    | All |
| BLOC1S3  | NM_212550    | All |
| CKM      | NM_001824    | All |
| ERCC2    | NM_000400    | All |
| CD3EAP   | NM_012099    | All |
| ERCC1    | NM_001983    | All |
| RTN2     | NM_005619    | All |
| OPA3     | NM_001017989 | All |
| GIPR     | NM_000164    | All |
| SIX5     | NM_175875    | All |
| DMPK     | NM_004409    | All |
| FOXA3    | NM_004497    | All |
| CCDC8    | NM_032040    | All |
| CALM3    | NM_005184    | All |
| PTGIR    | NM_000960    | All |
| PRKD2    | NM_016457    | All |
| FKRP     | NM_001039885 | All |
| C5AR2    | NM_001271749 | All |
| BICRA    | NM_015711    | All |
| EHD2     | NM_014601    | All |
| CRX      | NM_000554    | All |
| SULT2A1  | NM_003167    | All |
| PLA2G4C  | NM_003706    | All |
| LIG1     | NM_000234    | All |
| CARD8    | NM_001184900 | All |
| CCDC114  | NM_144577    | All |
| LMTK3    | NM_001080434 | All |

|          |              |     |
|----------|--------------|-----|
| SULT2B1  | NM_177973    | All |
| FUT2     | NM_000511    | All |
| FUT1     | NM_000148    | All |
| BCAT2    | NM_001190    | All |
| HSD17B14 | NM_016246    | All |
| BAX      | NM_004324    | All |
| GYS1     | NM_002103    | All |
| RUVBL2   | NM_006666    | All |
| NTF4     | NM_006179    | All |
| HRC      | NM_002152    | All |
| TRPM4    | NM_017636    | All |
| ALDH16A1 | NM_153329    | All |
| FCGRT    | NM_004107    | All |
| FUZ      | NM_025129    | All |
| MED25    | NM_030973    | All |
| PNKP     | NM_007254    | All |
| NUP62    | NM_001193357 | All |
| ATF5     | NM_001193646 | All |
| MYH14    | NM_001145809 | All |
| KCNC3    | NM_004977    | All |
| NR1H2    | NM_007121    | All |
| POLD1    | NM_001256849 | All |
| CLEC11A  | NM_002975    | All |
| KLK1     | NM_002257    | All |
| KLK15    | NM_017509    | All |
| KLK3     | NM_001648    | All |
| KLK4     | NM_004917    | All |
| KLK7     | NM_001243126 | All |
| KLK12    | NM_019598    | All |
| ETFB     | NM_001014763 | All |
| LIM2     | NM_030657    | All |
| SIGLEC12 | NM_053003    | All |
| HAS1     | NM_001523    | All |
| FPR1     | NM_002029    | All |
| FPR2     | NM_001005738 | All |
| ZNF350   | NM_021632    | All |
| PPP2R1A  | NM_014225    | All |
| NLRP12   | NM_001277126 | All |
| PRKCG    | NM_002739    | All |
| NDUFA3   | NM_004542    | All |
| PRPF31   | NM_015629    | All |
| CNOT3    | NM_014516    | All |
| TSEN34   | NM_001077446 | All |
| FCAR     | NM_002000    | All |
| NLRP7    | NM_001127255 | All |

|         |              |     |
|---------|--------------|-----|
| NLRP2   | NM_001174081 | All |
| GP6     | NM_001083899 | All |
| TNNT1   | NM_003283    | All |
| TNNI3   | NM_000363    | All |
| DNAAF3  | NM_001256714 | All |
| SBK3    | NM_001199824 | All |
| GALP    | NM_033106    | All |
| AURKC   | NM_001015878 | All |
| SLC27A5 | NM_012254    | All |
| DEFB126 | NM_030931    | All |
| TRIB3   | NM_021158    | All |
| RBCK1   | NM_031229    | All |
| TBC1D20 | NM_144628    | All |
| SLC52A3 | NM_033409    | All |
| RSPO4   | NM_001029871 | All |
| RAD21L1 | NM_001136566 | All |
| PDYN    | NM_001190900 | All |
| TGM6    | NM_198994    | All |
| IDH3B   | NM_006899    | All |
| MRPS26  | NM_030811    | All |
| AVP     | NM_000490    | All |
| ITPA    | NM_033453    | All |
| SLC4A11 | NM_001174090 | All |
| ADAM33  | NM_025220    | All |
| MAVS    | NM_020746    | All |
| PANK2   | NM_153638    | All |
| PRNP    | NM_001080123 | All |
| PRND    | NM_012409    | All |
| PROKR2  | NM_144773    | All |
| CHGB    | NM_001819    | All |
| FERMT1  | NM_017671    | All |
| BMP2    | NM_001200    | All |
| PLCB1   | NM_015192    | All |
| PLCB4   | NM_000933    | All |
| PAK5    | NM_177990    | All |
| MKKS    | NM_170784    | All |
| JAG1    | NM_000214    | All |
| NDUFAF5 | NM_024120    | All |
| MACROD2 | NM_080676    | All |
| FLRT3   | NM_013281    | All |
| OTOR    | NM_020157    | All |
| PCSK2   | NM_002594    | All |
| BFSP1   | NM_001195    | All |
| MGME1   | NM_052865    | All |
| SEC23B  | NM_032986    | All |

|         |              |     |
|---------|--------------|-----|
| DTD1    | NM_080820    | All |
| RIN2    | NM_001242581 | All |
| PAX1    | NM_006192    | All |
| FOXA2   | NM_021784    | All |
| THBD    | NM_000361    | All |
| CST3    | NM_000099    | All |
| VSX1    | NM_014588    | All |
| ABHD12  | NM_015600    | All |
| COX4I2  | NM_032609    | All |
| MYLK2   | NM_033118    | All |
| HCK     | NM_001172133 | All |
| ASXL1   | NM_015338    | All |
| DNMT3B  | NM_006892    | All |
| BPIFA1  | NM_001243193 | All |
| SNTA1   | NM_003098    | All |
| CHMP4B  | NM_176812    | All |
| ASIP    | NM_001672    | All |
| AHCY    | NM_000687    | All |
| ITCH    | NM_001257137 | All |
| GSS     | NM_000178    | All |
| PROCR   | NM_006404    | All |
| GDF5    | NM_000557    | All |
| CPNE1   | NM_152926    | All |
| EPB41L1 | NM_012156    | All |
| SAMHD1  | NM_015474    | All |
| MROH8   | NM_152503    | All |
| RPN2    | NM_002951    | All |
| GHRH    | NM_021081    | All |
| SRC     | NM_198291    | All |
| TGM2    | NM_004613    | All |
| BPI     | NM_001725    | All |
| LBP     | NM_004139    | All |
| MAFB    | NM_005461    | All |
| ZHX3    | NM_015035    | All |
| CHD6    | NM_032221    | All |
| PTPRT   | NM_133170    | All |
| L3MBTL1 | NM_032107    | All |
| MYBL2   | NM_002466    | All |
| JPH2    | NM_020433    | All |
| HNF4A   | NM_000457    | All |
| ADA     | NM_000022    | All |
| STK4    | NM_006282    | All |
| KCNS1   | NM_002251    | All |
| PI3     | NM_002638    | All |
| SEMG1   | NM_003007    | All |

|         |              |     |
|---------|--------------|-----|
| CTSA    | NM_000308    | All |
| PLTP    | NM_006227    | All |
| ZNF335  | NM_022095    | All |
| MMP9    | NM_004994    | All |
| SLC12A5 | NM_001134771 | All |
| CD40    | NM_001250    | All |
| CDH22   | NM_021248    | All |
| SLC13A3 | NM_022829    | All |
| TP53RK  | NM_033550    | All |
| SLC2A10 | NM_030777    | All |
| NCOA3   | NM_181659    | All |
| ARFGEF2 | NM_006420    | All |
| PTGIS   | NM_000961    | All |
| RNF114  | NM_018683    | All |
| PTPN1   | NM_002827    | All |
| ADNP    | NM_181442    | All |
| DPM1    | NM_003859    | All |
| SALL4   | NM_020436    | All |
| CYP24A1 | NM_000782    | All |
| MC3R    | NM_019888    | All |
| BMP7    | NM_001719    | All |
| PCK1    | NM_002591    | All |
| VAPB    | NM_004738    | All |
| STX16   | NM_001001433 | All |
| GNAS    | NM_080425    | All |
| CTSZ    | NM_001336    | All |
| TUBB1   | NM_030773    | All |
| ATP5F1E | NM_006886    | All |
| EDN3    | NM_207034    | All |
| SYCP2   | NM_014258    | All |
| PSMA7   | NM_002792    | All |
| HRH3    | NM_007232    | All |
| LAMA5   | NM_005560    | All |
| SLCO4A1 | NM_016354    | All |
| COL9A3  | NM_001853    | All |
| CHRNA4  | NM_000744    | All |
| KCNQ2   | NM_172107    | All |
| EEF1A2  | NM_001958    | All |
| RTEL1   | NM_032957    | All |
| DNAJC5  | NM_025219    | All |
| PRPF6   | NM_012469    | All |
| SOX18   | NM_018419    | All |
| OPRL1   | NM_001200019 | All |
| MYT1    | NM_004535    | All |
| LIPI    | NM_198996    | All |



|          |              |     |
|----------|--------------|-----|
| NRIP1    | NM_003489    | All |
| TMPRSS15 | NM_002772    | All |
| MRPL39   | NM_080794    | All |
| ATP5PF   | NM_001003697 | All |
| APP      | NM_000484    | All |
| LTN1     | NM_015565    | All |
| GRIK1    | NM_000830    | All |
| SOD1     | NM_000454    | All |
| MRAP     | NM_178817    | All |
| CFAP298  | NM_021254    | All |
| SYNJ1    | NM_003895    | All |
| IFNAR2   | NM_207585    | All |
| IL10RB   | NM_000628    | All |
| IFNAR1   | NM_000629    | All |
| IFNGR2   | NM_005534    | All |
| ATP5PO   | NM_001697    | All |
| MRPS6    | NM_032476    | All |
| KCNE2    | NM_172201    | All |
| KCNE1    | NM_001127670 | All |
| RCAN1    | NM_004414    | All |
| RUNX1    | NM_001754    | All |
| CBR1     | NM_001757    | All |
| CBR3     | NM_001236    | All |
| CLDN14   | NM_012130    | All |
| HLCS     | NM_001242785 | All |
| DYRK1A   | NM_001396    | All |
| KCNJ6    | NM_002240    | All |
| KCNJ15   | NM_170737    | All |
| BRWD1    | NM_018963    | All |
| PCP4     | NM_006198    | All |
| DSCAM    | NM_001389    | All |
| MX1      | NM_001178046 | All |
| RIPK4    | NM_020639    | All |
| ABCG1    | NM_004915    | All |
| TFF1     | NM_003225    | All |
| TMPRSS3  | NM_001256317 | All |
| RSPH1    | NM_080860    | All |
| SLC37A1  | NM_018964    | All |
| WDR4     | NM_033661    | All |
| NDUFV3   | NM_021075    | All |
| CBS      | NM_001178008 | All |
| CRYAA    | NM_000394    | All |
| RRP1B    | NM_015056    | All |
| PDXK     | NM_003681    | All |
| CSTB     | NM_000100    | All |

|              |              |     |
|--------------|--------------|-----|
| TRAPPC10     | NM_003274    | All |
| DNMT3L       | NM_013369    | All |
| AIRE         | NM_000383    | All |
| PFKL         | NM_002626    | All |
| C21orf2      | NM_001271441 | All |
| TRPM2        | NM_003307    | All |
| TSPEAR       | NM_144991    | All |
| ITGB2        | NM_000211    | All |
| ADARB1       | NM_015833    | All |
| COL18A1      | NM_030582    | All |
| SLC19A1      | NM_194255    | All |
| COL6A1       | NM_001848    | All |
| COL6A2       | NM_001849    | All |
| FTCD         | NM_006657    | All |
| LSS          | NM_001001438 | All |
| MCM3AP       | NM_003906    | All |
| PCNT         | NM_006031    | All |
| DIP2A        | NM_015151    | All |
| S100B        | NM_006272    | All |
| IL17RA       | NM_014339    | All |
| ADA2         | NM_177405    | All |
| SLC25A18     | NM_031481    | All |
| LOC101929372 | NM_001288707 | All |
| PEX26        | NM_017929    | All |
| TUBA8        | NM_018943    | All |
| DGCR2        | NM_005137    | All |
| TSSK2        | NM_053006    | All |
| ESS2         | NM_022719    | All |
| SLC25A1      | NM_005984    | All |
| CLTCL1       | NM_007098    | All |
| HIRA         | NM_003325    | All |
| MRPL40       | NM_003776    | All |
| UFD1         | NM_005659    | All |
| GP1BB        | NM_000407    | All |
| TBX1         | NM_080647    | All |
| GNB1L        | NM_053004    | All |
| TXNRD2       | NM_006440    | All |
| COMT         | NM_000754    | All |
| ARVCF        | NM_001670    | All |
| DGCR8        | NM_022720    | All |
| ZDHHC8       | NM_001185024 | All |
| RTN4R        | NM_023004    | All |
| SCARF2       | NM_182895    | All |
| SERPIND1     | NM_000185    | All |
| SNAP29       | NM_004782    | All |

|          |              |     |
|----------|--------------|-----|
| CRKL     | NM_005207    | All |
| MAPK1    | NM_002745    | All |
| VPREB1   | NM_007128    | All |
| SMARCB1  | NM_003073    | All |
| MIF      | NM_002415    | All |
| GSTT1    | NM_000853    | All |
| CABIN1   | NM_012295    | All |
| SPECC1L  | NM_001145468 | All |
| ADORA2A  | NM_000675    | All |
| UPB1     | NM_016327    | All |
| PIWIL3   | NM_001008496 | All |
| CRYBB3   | NM_004076    | All |
| LRP5L    | NM_001135772 | All |
| GRK3     | NM_005160    | All |
| MYO18B   | NM_032608    | All |
| HPS4     | NM_152841    | All |
| CRYBB1   | NM_001887    | All |
| CRYBA4   | NM_001886    | All |
| MN1      | NM_002430    | All |
| XBP1     | NM_001079539 | All |
| EWSR1    | NM_013986    | All |
| NEFH     | NM_021076    | All |
| NIPSNAP1 | NM_003634    | All |
| NF2      | NM_000268    | All |
| LIF      | NM_002309    | All |
| TCN2     | NM_000355    | All |
| DRG1     | NM_004147    | All |
| SLC5A1   | NM_000343    | All |
| FBXO7    | NM_012179    | All |
| SYN3     | NM_003490    | All |
| TIMP3    | NM_000362    | All |
| LARGE1   | NM_133642    | All |
| HMOX1    | NM_002133    | All |
| MCM5     | NM_006739    | All |
| APOL3    | NM_145640    | All |
| APOL1    | NM_001136540 | All |
| MYH9     | NM_002473    | All |
| TXN2     | NM_012473    | All |
| CACNG2   | NM_006078    | All |
| NCF4     | NM_000631    | All |
| CSF2RB   | NM_000395    | All |
| TST      | NM_003312    | All |
| MPST     | NM_021126    | All |
| TMPRSS6  | NM_153609    | All |
| RAC2     | NM_002872    | All |

|                   |              |     |
|-------------------|--------------|-----|
| LGALS2            | NM_006498    | All |
| TRIOBP            | NM_001039141 | All |
| SOX10             | NM_006941    | All |
| PICK1             | NM_001039583 | All |
| PLA2G6            | NM_003560    | All |
| CSNK1E            | NM_001894    | All |
| TPTEP2-<br>CSNK1E | NM_001289912 | All |
| DMC1              | NM_007068    | All |
| SUN2              | NM_001199579 | All |
| APOBEC3H          | NM_001166003 | All |
| PDGFB             | NM_002608    | All |
| SYNGR1            | NM_004711    | All |
| ADSL              | NM_000026    | All |
| MRTFA             | NM_020831    | All |
| MCHR1             | NM_005297    | All |
| SLC25A17          | NM_006358    | All |
| XPNPEP3           | NM_022098    | All |
| EP300             | NM_001429    | All |
| SREBF2            | NM_004599    | All |
| TNFRSF13C         | NM_052945    | All |
| NAGA              | NM_000262    | All |
| NDUFA6            | NM_002490    | All |
| CYB5R3            | NM_001171660 | All |
| A4GALT            | NM_017436    | All |
| TSPO              | NM_000714    | All |
| SULT4A1           | NM_014351    | All |
| PNPLA3            | NM_025225    | All |
| UPK3A             | NM_006953    | All |
| SMC1B             | NM_148674    | All |
| FBLN1             | NM_006486    | All |
| ATXN10            | NM_013236    | All |
| PPARA             | NM_001001928 | All |
| TRMU              | NM_018006    | All |
| CELSR1            | NM_014246    | All |
| ALG12             | NM_024105    | All |
| IL17REL           | NM_001001694 | All |
| MLC1              | NM_139202    | All |
| TUBGCP6           | NM_020461    | All |
| SBF1              | NM_002972    | All |
| SCO2              | NM_001169111 | All |
| TYMP              | NM_001257989 | All |
| CPT1B             | NM_004377    | All |
| CHKB              | NM_005198    | All |
| ARSA              | NM_001085425 | All |

|          |              |     |
|----------|--------------|-----|
| SHANK3   | NM_033517    | All |
| ARSF     | NM_001201538 | All |
| STS      | NM_000351    | All |
| TBL1X    | NM_005647    | All |
| GPR143   | NM_000273    | All |
| CLCN4    | NM_001830    | All |
| MID1     | NM_033290    | All |
| HCCS     | NM_001122608 | All |
| ARHGAP6  | NM_013427    | All |
| AMELX    | NM_182680    | All |
| FRMPD4   | NM_014728    | All |
| PRPS2    | NM_001039091 | All |
| TLR7     | NM_016562    | All |
| TLR8     | NM_138636    | All |
| ATXN3L   | NM_001135995 | All |
| FANCB    | NM_152633    | All |
| PIGA     | NM_002641    | All |
| AP1S2    | NM_001272071 | All |
| GRPR     | NM_005314    | All |
| S100G    | NM_004057    | All |
| REPS2    | NM_004726    | All |
| NHS      | NM_198270    | All |
| CDKL5    | NM_003159    | All |
| RS1      | NM_000330    | All |
| PHKA2    | NM_000292    | All |
| PDHA1    | NM_001173454 | All |
| MAP3K15  | NM_001001671 | All |
| RPS6KA3  | NM_004586    | All |
| CNKSR2   | NM_014927    | All |
| SMPX     | NM_014332    | All |
| MBTPS2   | NM_015884    | All |
| PHEX     | NM_000444    | All |
| DDX53    | NM_182699    | All |
| PTCHD1   | NM_173495    | All |
| EIF2S3   | NM_001415    | All |
| PDK3     | NM_001142386 | All |
| POLA1    | NM_016937    | All |
| ARX      | NM_139058    | All |
| IL1RAPL1 | NM_014271    | All |
| NR0B1    | NM_000475    | All |
| GK       | NM_001205019 | All |
| FTHL17   | NM_031894    | All |
| DMD      | NM_004006    | All |
| XK       | NM_021083    | All |
| CYBB     | NM_000397    | All |

|         |              |     |
|---------|--------------|-----|
| SYTL5   | NM_001163334 | All |
| SRPX    | NM_006307    | All |
| OTC     | NM_000531    | All |
| TSPAN7  | NM_004615    | All |
| BCOR    | NM_001123385 | All |
| ATP6AP2 | NM_005765    | All |
| USP9X   | NM_001039590 | All |
| NYX     | NM_022567    | All |
| CASK    | NM_003688    | All |
| MAOA    | NM_000240    | All |
| MAOB    | NM_000898    | All |
| NDP     | NM_000266    | All |
| EFHC2   | NM_025184    | All |
| KDM6A   | NM_021140    | All |
| CHST7   | NM_019886    | All |
| RP2     | NM_006915    | All |
| NDUFB11 | NM_019056    | All |
| RBM10   | NM_001204468 | All |
| UBA1    | NM_153280    | All |
| CDK16   | NM_001170460 | All |
| ZNF41   | NM_153380    | All |
| ARAF    | NM_001256196 | All |
| SYN1    | NM_006950    | All |
| TIMP1   | NM_003254    | All |
| CFP     | NM_002621    | All |
| ELK1    | NM_005229    | All |
| ZNF81   | NM_007137    | All |
| FTSJ1   | NM_012280    | All |
| PORCN   | NM_203475    | All |
| WDR13   | NM_017883    | All |
| WAS     | NM_000377    | All |
| GATA1   | NM_002049    | All |
| PQBP1   | NM_001032383 | All |
| SLC35A2 | NM_005660    | All |
| TFE3    | NM_006521    | All |
| WDR45   | NM_001029896 | All |
| PLP2    | NM_002668    | All |
| SYP     | NM_003179    | All |
| CACNA1F | NM_001256789 | All |
| CCDC22  | NM_014008    | All |
| FOXP3   | NM_014009    | All |
| CLCN5   | NM_001127898 | All |
| DGKK    | NM_001013742 | All |
| SHROOM4 | NM_020717    | All |
| BMP15   | NM_005448    | All |

|          |              |     |
|----------|--------------|-----|
| GSPT2    | NM_018094    | All |
| KDM5C    | NM_004187    | All |
| IQSEC2   | NM_001111125 | All |
| SMC1A    | NM_006306    | All |
| HSD17B10 | NM_004493    | All |
| HUWE1    | NM_031407    | All |
| PHF8     | NM_001184896 | All |
| FGD1     | NM_004463    | All |
| ITIH6    | NM_198510    | All |
| PFKFB1   | NM_002625    | All |
| ALAS2    | NM_000032    | All |
| KLF8     | NM_007250    | All |
| UBQLN2   | NM_013444    | All |
| FAAH2    | NM_174912    | All |
| ARHGEF9  | NM_001173479 | All |
| AMER1    | NM_152424    | All |
| ZC4H2    | NM_018684    | All |
| VSIG4    | NM_007268    | All |
| EDA2R    | NM_001242310 | All |
| AR       | NM_000044    | All |
| OPHN1    | NM_002547    | All |
| EFNB1    | NM_004429    | All |
| EDA      | NM_001399    | All |
| P2RY4    | NM_002565    | All |
| KIF4A    | NM_012310    | All |
| DLG3     | NM_021120    | All |
| FOXO4    | NM_005938    | All |
| IL2RG    | NM_000206    | All |
| MED12    | NM_005120    | All |
| NLGN3    | NM_181303    | All |
| GJB1     | NM_001097642 | All |
| ZMYM3    | NM_201599    | All |
| TAF1     | NM_004606    | All |
| CXCR3    | NM_001142797 | All |
| HDAC8    | NM_018486    | All |
| PHKA1    | NM_002637    | All |
| ZCCHC13  | NM_203303    | All |
| SLC16A2  | NM_006517    | All |
| NEXMIF   | NM_001008537 | All |
| ABCB7    | NM_004299    | All |
| ZDHHC15  | NM_144969    | All |
| MAGEE2   | NM_138703    | All |
| ATRX     | NM_000489    | All |
| MAGT1    | NM_032121    | All |
| COX7B    | NM_001866    | All |

|                    |              |     |
|--------------------|--------------|-----|
| ATP7A              | NM_000052    | All |
| CYSLTR1            | NM_006639    | All |
| TBX22              | NM_016954    | All |
| BRWD3              | NM_153252    | All |
| POU3F4             | NM_000307    | All |
| HDX                | NM_144657    | All |
| SATL1              | NM_001012980 | All |
| ZNF711             | NM_021998    | All |
| POF1B              | NM_024921    | All |
| CHM                | NM_000390    | All |
| DIAPH2             | NM_006729    | All |
| RPA4               | NM_013347    | All |
| PCDH19             | NM_001184880 | All |
| SRPX2              | NM_014467    | All |
| NOX1               | NM_007052    | All |
| DRP2               | NM_001939    | All |
| TAF7L              | NM_024885    | All |
| TIMM8A             | NM_004085    | All |
| BTK                | NM_000061    | All |
| RPL36A-<br>HNRNPH2 | NM_001199974 | All |
| GLA                | NM_000169    | All |
| HNRNPH2            | NM_001032393 | All |
| NXF3               | NM_022052    | All |
| BEX4               | NM_001127688 | All |
| PLP1               | NM_000533    | All |
| H2BFWT             | NM_001002916 | All |
| ZCCHC18            | NM_001143978 | All |
| SERPINA7           | NM_000354    | All |
| PRPS1              | NM_002764    | All |
| COL4A6             | NM_033641    | All |
| IRS4               | NM_003604    | All |
| KCNE5              | NM_012282    | All |
| ACSL4              | NM_022977    | All |
| CHRDL1             | NM_145234    | All |
| PAK3               | NM_001128168 | All |
| DCX                | NM_000555    | All |
| ALG13              | NM_001099922 | All |
| TRPC5              | NM_012471    | All |
| HTR2C              | NM_000868    | All |
| AGTR2              | NM_000686    | All |
| SLC6A14            | NM_007231    | All |
| ZCCHC12            | NM_173798    | All |
| PGRMC1             | NM_006667    | All |
| SLC25A43           | NM_145305    | All |



|           |              |     |
|-----------|--------------|-----|
| UBE2A     | NM_003336    | All |
| UPF3B     | NM_080632    | All |
| RNF113A   | NM_006978    | All |
| NDUFA1    | NM_004541    | All |
| LAMP2     | NM_001122606 | All |
| CUL4B     | NM_003588    | All |
| C1GALT1C1 | NM_001011551 | All |
| GRIA3     | NM_000828    | All |
| THOC2     | NM_001081550 | All |
| SH2D1A    | NM_002351    | All |
| OCRL      | NM_000276    | All |
| XPNPEP2   | NM_003399    | All |
| ZDHHC9    | NM_016032    | All |
| BCORL1    | NM_021946    | All |
| ELF4      | NM_001127197 | All |
| AIFM1     | NM_004208    | All |
| SLC25A14  | NM_001282197 | All |
| IGSF1     | NM_001170961 | All |
| FRMD7     | NM_194277    | All |
| USP26     | NM_031907    | All |
| GPC4      | NM_001448    | All |
| GPC3      | NM_001164617 | All |
| PHF6      | NM_032458    | All |
| HPRT1     | NM_000194    | All |
| ZNF75D    | NM_001185063 | All |
| SLC9A6    | NM_001042537 | All |
| FHL1      | NM_001159702 | All |
| MAP7D3    | NM_024597    | All |
| CD40LG    | NM_000074    | All |
| ARHGEF6   | NM_004840    | All |
| ZIC3      | NM_003413    | All |
| F9        | NM_000133    | All |
| MCF2      | NM_001171876 | All |
| SOX3      | NM_005634    | All |
| CDR1      | NM_004065    | All |
| FMR1      | NM_002024    | All |
| AFF2      | NM_002025    | All |
| MAMLD1    | NM_001177465 | All |
| MTM1      | NM_000252    | All |
| VMA21     | NM_001017980 | All |
| GABRE     | NM_004961    | All |
| GABRA3    | NM_000808    | All |
| GABRQ     | NM_018558    | All |
| NSDHL     | NM_015922    | All |
| ATP2B3    | NM_001001344 | All |

|          |              |     |
|----------|--------------|-----|
| L1CAM    | NM_001278116 | All |
| AVPR2    | NM_000054    | All |
| NAA10    | NM_003491    | All |
| RENBP    | NM_002910    | All |
| HCFC1    | NM_005334    | All |
| TMEM187  | NM_003492    | All |
| IRAK1    | NM_001569    | All |
| MECP2    | NM_001110792 | All |
| FLNA     | NM_001110556 | All |
| EMD      | NM_000117    | All |
| TAZ      | NM_000116    | All |
| GDI1     | NM_001493    | All |
| SLC10A3  | NM_001142392 | All |
| G6PD     | NM_000402    | All |
| DKC1     | NM_001363    | All |
| F8       | NM_000132    | All |
| BRCC3    | NM_024332    | All |
| RAB39B   | NM_171998    | All |
| CLIC2    | NM_001289    | All |
| B3GALT6  | NM_080605    | All |
| UQCRHL   | NM_001089591 | All |
| LCE3E    | NM_178435    | All |
| LCE3C    | NM_178434    | All |
| LCE3B    | NM_178433    | All |
| PRG4     | NM_005807    | All |
| FMN2     | NM_020066    | All |
| GPX1     | NM_000581    | All |
| PYDC2    | NM_001083308 | All |
| PDHA2    | NM_005390    | All |
| NDUFAF2  | NM_174889    | All |
| TSSK1B   | NM_032028    | All |
| RPS14    | NM_001025070 | All |
| KIF4B    | NM_001099293 | All |
| MSX2     | NM_002449    | All |
| HIGD2A   | NM_138820    | All |
| HLA-DQA1 | NM_002122    | All |
| HLA-DQB1 | NM_002123    | All |
| TAAR8    | NM_053278    | All |
| STX1A    | NM_004603    | All |
| HSPB1    | NM_001540    | All |
| MNX1     | NM_005515    | All |
| PRKACG   | NM_002732    | All |
| MRPL50   | NM_019051    | All |
| ASS1     | NM_000050    | All |
| AKR1C3   | NM_001253908 | All |

|          |              |                  |
|----------|--------------|------------------|
| FGF8     | NM_033163    | All              |
| CSNK2A3  | NM_001256686 | All              |
| TRAF6    | NM_004620    | All              |
| FEN1     | NM_004111    | All              |
| KCNA6    | NM_002235    | All              |
| TAS2R19  | NM_176888    | All              |
| PGAM5    | NM_001170543 | All              |
| ACTC1    | NM_005159    | All              |
| NR2F2    | NM_021005    | All              |
| GFER     | NM_005262    | All              |
| CTF1     | NM_001330    | All              |
| KCNJ12   | NM_021012    | All              |
| KCNJ18   | NM_001194958 | All              |
| FUT6     | NM_001040701 | All              |
| CD209    | NM_021155    | All              |
| SPINT2   | NM_021102    | All              |
| FTL      | NM_000146    | All              |
| ZNF480   | NM_144684    | All              |
| SEMG2    | NM_003008    | All              |
| AURKA    | NM_003600    | All              |
| ACO2     | NM_001098    | All              |
| ZFX      | NM_001178084 | All              |
| RPGR     | NM_001034853 | All              |
| EBP      | NM_006579    | All              |
| RLIM     | NM_016120    | All              |
| PGK1     | NM_000291    | All              |
| GLUD2    | NM_012084    | All              |
| VWA1     | NM_022834    | 1                |
| MIB2     | NM_080875    | 3                |
| TNFRSF14 | NM_003820    | 3                |
| CHD5     | NM_015557    | 38               |
| ACOT7    | NM_007274    | 5-6, 8           |
| ESPN     | NM_031475    | 1, 6, 11-13      |
| RERE     | NM_001042681 | 19               |
| SLC25A33 | NM_032315    | 2-6              |
| NMNAT1   | NM_022787    | 3-5              |
| TARDBP   | NM_007375    | 2-4              |
| PRDM2    | NM_012231    | 2-7, 9           |
| CLCNKA   | NM_004070    | 2-6, 8-14, 16-19 |
| CLCNKB   | NM_000085    | 2-6, 8-14, 16-19 |
| AKR7A3   | NM_012067    | 3-6              |
| AKR7A2   | NM_003689    | 1-6              |
| RHD      | NM_016124    | 4, 7             |
| RHCE     | NM_020485    | 4, 7             |
| SELENON  | NM_206926    | 2-12             |

|         |              |                 |
|---------|--------------|-----------------|
| UBXN11  | NM_183008    | 16              |
| LIN28A  | NM_024674    | 1-3             |
| FGR     | NM_005248    | 12              |
| SDC3    | NM_014654    | 2-5             |
| SPOCD1  | NM_144569    | 4               |
| TFAP2E  | NM_178548    | 7               |
| AGO3    | NM_024852    | 12              |
| MAP7D1  | NM_018067    | 10-11           |
| EVA1B   | NM_018166    | 3               |
| BMP8A   | NM_181809    | 6               |
| FOXO6   | NM_001291281 | 1               |
| MED8    | NM_052877    | 1               |
| SLC6A9  | NM_201649    | 3               |
| TOE1    | NM_025077    | 1               |
| CYP4A11 | NM_000778    | 1-4, 6, 10      |
| CYP4Z1  | NM_178134    | 8               |
| CYP4A22 | NM_001010969 | 2-4, 6, 10      |
| MIER1   | NM_001077700 | 1               |
| CELSR2  | NM_001408    | 2, 25           |
| SYPL2   | NM_001040709 | 6               |
| GSTM4   | NM_000850    | 1, 5-7          |
| GSTM2   | NM_000848    | 1-2, 4-7        |
| GSTM1   | NM_000561    | 1, 5-7          |
| GSTM5   | NM_000851    | 1, 4-8          |
| CHIA    | NM_201653    | 2-7, 9-12       |
| ATP1A1  | NM_000701    | 14              |
| IGSF3   | NM_001542    | 10              |
| HSD3B2  | NM_000198    | 2-3             |
| HSD3B1  | NM_000862    | 2               |
| NOTCH2  | NM_024408    | 1, 5-34         |
| PDE4DIP | NM_001198834 | 1               |
| SF3B4   | NM_005850    | 1-2, 4-6        |
| MRPS21  | NM_031901    | 2               |
| ENSA    | NM_004436    | 1-2, 4          |
| PIP5K1A | NM_001135638 | 6               |
| DENND4B | NM_014856    | 18              |
| GBA     | NM_001005742 | 4-5, 9-10       |
| YY1AP1  | NM_001198903 | 2-4, 7-8, 10    |
| GON4L   | NM_032292    | 2-16, 18-19, 21 |
| BCAN    | NM_021948    | 13-14           |
| SH2D2A  | NM_001161441 | 2               |
| INSRR   | NM_014215    | 19              |
| CD1D    | NM_001766    | 5               |
| CD1C    | NM_001765    | 1               |
| IGSF8   | NM_001206665 | 2               |

|          |              |                                    |
|----------|--------------|------------------------------------|
| ATP1A4   | NM_144699    | 6, 8, 10, 12-13,<br>15-16, 18      |
| SDHC     | NM_003001    | 1-4                                |
| FCGR2A   | NM_001136219 | 1-2, 5                             |
| FCGR3A   | NM_000569    | 1                                  |
| FCGR3B   | NM_001244753 | 1                                  |
| FCGR2B   | NM_004001    | 5, 7-8                             |
| LMX1A    | NM_001174069 | 7                                  |
| POU2F1   | NM_002697    | 1                                  |
| C1orf112 | NM_018186    | 12                                 |
| ABL2     | NM_005158    | 4                                  |
| QSOX1    | NM_002826    | 1                                  |
| KIAA1614 | NM_020950    | 4                                  |
| GLUL     | NM_001033056 | 3-5, 7                             |
| CFH      | NM_000186    | 1-19                               |
| CFHR3    | NM_021023    | 2-3, 5-6                           |
| CFHR1    | NM_002113    | 1, 3                               |
| CFHR4    | NM_001201550 | 2, 4-6, 9-10                       |
| CFHR2    | NM_005666    | 1, 3, 5                            |
| SOX13    | NM_005686    | 12                                 |
| SRGAP2   | NM_015326    | 8-20                               |
| CD55     | NM_001114752 | 1-9, 11                            |
| CR1      | NM_000651    | 1-2, 4, 24, 30-32,<br>34-40, 42-47 |
| CR1L     | NM_175710    | 1-2, 4, 8, 12                      |
| NEK2     | NM_002497    | 1, 3-5, 7                          |
| GPATCH2  | NM_018040    | 1                                  |
| LEFTY1   | NM_020997    | 1                                  |
| LEFTY2   | NM_003240    | 1,3                                |
| CDC42BPA | NM_003607    | 7                                  |
| WNT3A    | NM_033131    | 4                                  |
| FH       | NM_000143    | 2-10                               |
| COX20    | NM_198076    | 1-3                                |
| MATN3    | NM_002381    | 2-8                                |
| SLC5A6   | NM_021095    | 9, 12                              |
| TRIM54   | NM_032546    | 7-8                                |
| EHD3     | NM_014600    | 4                                  |
| CEBPZ    | NM_005760    | 1                                  |
| KCNK12   | NM_022055    | 1                                  |
| SPTBN1   | NM_003128    | 4                                  |
| RPS27A   | NM_001135592 | 2-3, 5                             |
| VRK2     | NM_001130480 | 13                                 |
| ACTG2    | NM_001615    | 6,8                                |
| REG1B    | NM_006507    | 4                                  |
| MRPL35   | NM_016622    | 1                                  |

|          |              |                           |
|----------|--------------|---------------------------|
| RANBP2   | NM_006267    | 20-29                     |
| POTEF    | NM_001099771 | 17                        |
| POTEJ    | NM_001277083 | 15                        |
| POTEE    | NM_001083538 | 15                        |
| PLA2R1   | NM_007366    | 1                         |
| HSPD1    | NM_002156    | 2, 4-6, 8-9               |
| EEF1B2   | NM_001037663 | 2-3, 5-7                  |
| RPE      | NM_199229    | 2                         |
| FARSB    | NM_005687    | 5                         |
| SP140L   | NM_138402    | 2-5                       |
| ING5     | NM_032329    | 6                         |
| BRPF1    | NM_001003694 | 3                         |
| CAMK1    | NM_003656    | 3                         |
| FANCD2   | NM_033084    | 2-12, 16, 18-21,<br>26-43 |
| LSM3     | NM_014463    | 1                         |
| SLC6A6   | NM_001134367 | 11-23                     |
| ANKRD28  | NM_015199    | 1                         |
| DAZL     | NM_001351    | 1, 3, 5-8, 10             |
| RPL15    | NM_001253383 | 3                         |
| PDCD6IP  | NM_001162429 | 1-8, 16-18                |
| SLC22A13 | NM_004256    | 1, 7                      |
| RPSA     | NM_002295    | 2-3, 5-6                  |
| RPL14    | NM_003973    | 6                         |
| ANO10    | NM_018075    | 2, 4-13                   |
| TDGF1    | NM_001174136 | 2-5                       |
| SHISA5   | NM_016479    | 1                         |
| CELSR3   | NM_001407    | 26                        |
| EIF4E3   | NM_001134651 | 5                         |
| PROS1    | NM_000313    | 1-4, 7, 10                |
| ZPLD1    | NM_175056    | 9                         |
| MYLK     | NM_053025    | 4-15, 17-24, 26-34        |
| IFT122   | NM_052989    | 1-13, 17-25, 27-30        |
| COL6A6   | NM_001102608 | 2                         |
| EPHB1    | NM_004441    | 1, 9, 11                  |
| GYG1     | NM_004130    | 1-5, 7-8                  |
| CP       | NM_000096    | 1-8,10-19                 |
| MLF1     | NM_022443    | 1-5, 7                    |
| GOLIM4   | NM_014498    | 10                        |
| MECOM    | NM_004991    | 6-7                       |
| PIK3CA   | NM_006218    | 2-9, 11, 15-21            |
| KCNMB3   | NM_014407    | 1-3                       |
| NDUFB5   | NM_002492    | 6                         |
| HTR3D    | NM_001163646 | 6, 8                      |
| HTR3E    | NM_001256614 | 1-5, 7                    |

|         |              |              |
|---------|--------------|--------------|
| EPHB3   | NM_004443    | 1, 12-13, 16 |
| MUC4    | NM_018406    | 1, 3-25      |
| RPL35A  | NM_000996    | 2, 4-5       |
| CPLX1   | NM_006651    | 3            |
| NKX1-1  | NM_001290079 | 2            |
| C4orf48 | NM_001168243 | 2            |
| HGFAC   | NM_001528    | 1            |
| CRMP1   | NM_001014809 | 14           |
| RBPJ    | NM_015874    | 1-3, 6-11    |
| NIPAL1  | NM_207330    | 5            |
| UGT2B7  | NM_001074    | 1            |
| UGT2B4  | NM_021139    | 1-4, 6       |
| HTN1    | NM_002159    | 5            |
| ADAMTS3 | NM_014243    | 5            |
| ANKRD17 | NM_032217    | 1            |
| CXCL6   | NM_002993    | 1-3          |
| MRPS18C | NM_016067    | 1-4          |
| NKX6-1  | NM_006168    | 1            |
| ADH5    | NM_000671    | 1-4, 6-9     |
| ADH1B   | NM_000668    | 1-5, 7-9     |
| ADH1C   | NM_000669    | 1-5, 7-9     |
| CISD2   | NM_001008388 | 1-2          |
| PDE5A   | NM_001083    | 1            |
| GYPE    | NM_198682    | 3            |
| GYPB    | NM_002100    | 4            |
| GYPA    | NM_002099    | 3, 5-7       |
| GRIA2   | NM_000826    | 14           |
| GLRA3   | NM_006529    | 4            |
| WWC2    | NM_024949    | 1            |
| FRG1    | NM_004477    | 1            |
| SDHA    | NM_004168    | 7, 9         |
| TENT4A  | NM_006999    | 2-13         |
| CDH12   | NM_004061    | 5, 7-15      |
| PRDM9   | NM_020227    | 2-3, 5-9     |
| PRKAA1  | NM_206907    | 1            |
| OCLN    | NM_002538    | 2-4          |
| NAIP    | NM_004536    | 4-5          |
| TNPO1   | NM_153188    | 2-13, 15-24  |
| FOXD1   | NM_004472    | 1            |
| BTF3    | NM_001037637 | 1            |
| MCC     | NM_001085377 | 1            |
| SMAD5   | NM_001001420 | 7-8          |
| GFRA3   | NM_001496    | 1            |
| EGR1    | NM_001964    | 1            |
| IK      | NM_006083    | 1            |

|         |              |                                                 |
|---------|--------------|-------------------------------------------------|
| DND1    | NM_194249    | 1-3                                             |
| CSNK1A1 | NM_001025105 | 3-4, 6, 11                                      |
| SLC36A1 | NM_078483    | 11                                              |
| HAVCR2  | NM_032782    | 1                                               |
| CANX    | NM_001024649 | 13                                              |
| TUBB2A  | NM_001069    | 2-3                                             |
| TUBB2B  | NM_178012    | 1-3                                             |
| LYRM4   | NM_001164840 | 1-2                                             |
| MCUR1   | NM_001031713 | 1                                               |
| BTN2A2  | NM_006995    | 3, 6, 8                                         |
| BTN2A1  | NM_007049    | 3-8                                             |
| GABBR1  | NM_001470    | 2, 5-7, 12, 15, 19,<br>21-23                    |
| CFB     | NM_001710    | 5, 13, 15-16                                    |
| HLA-DRA | NM_019111    | 1-2                                             |
| COL11A2 | NM_080680    | 2-3, 14, 18-21, 24,<br>30, 33-35, 56, 62-<br>63 |
| MAPK13  | NM_002754    | 4                                               |
| TFEB    | NM_001167827 | 2                                               |
| CUL9    | NM_015089    | 25                                              |
| CRISP3  | NM_006061    | 3, 7                                            |
| GSTA2   | NM_000846    | 2, 4-6                                          |
| GSTA1   | NM_145740    | 2, 4-6                                          |
| GSTA5   | NM_153699    | 3-6                                             |
| GSTA3   | NM_000847    | 2-6                                             |
| GCM1    | NM_003643    | 3                                               |
| LRRC1   | NM_018214    | 1                                               |
| SNX14   | NM_153816    | 13                                              |
| COQ3    | NM_017421    | 3                                               |
| MARCKS  | NM_002356    | 1                                               |
| HDAC2   | NM_001527    | 1                                               |
| RAET1L  | NM_130900    | 1                                               |
| MTHFD1L | NM_001242767 | 1-24, 27                                        |
| IPCEF1  | NM_015553    | 5                                               |
| RSPH3   | NM_031924    | 8                                               |
| LPA     | NM_005577    | 3-8, 10-16, 18, 20-<br>29, 32-40                |
| PLG     | NM_000301    | 6-19                                            |
| MAP3K4  | NM_005922    | 17                                              |
| UNC93A  | NM_018974    | 1-7                                             |
| SLC29A4 | NM_001040661 | 3, 6, 8-9                                       |
| RNF216  | NM_207111    | 3-5, 7-17                                       |
| PMS2    | NM_000535    | 6-11                                            |
| SP4     | NM_003112    | 2                                               |
| HOXA6   | NM_024014    | 2                                               |



|            |              |                               |
|------------|--------------|-------------------------------|
| HOXA7      | NM_006896    | 2                             |
| CREB5      | NM_004904    | 8                             |
| CRHR2      | NM_001202475 | 7                             |
| RP9        | NM_203288    | 2-5                           |
| NPSR1      | NM_207173    | 1-8                           |
| TBX20      | NM_001077653 | 1-4                           |
| CAMK2B     | NM_001220    | 1, 5, 23                      |
| PPIA       | NM_021130    | 1-3                           |
| COBL       | NM_015198    | 1                             |
| MRPS17     | NM_015969    | 2                             |
| PSPH       | NM_004577    | 4-5, 7                        |
| PHKG1      | NM_001258459 | 2-10                          |
| GUSB       | NM_000181    | 1-5, 7-8, 12                  |
| SBDS       | NM_016038    | 5                             |
| FKBP6      | NM_003602    | 5-8                           |
| GTF2IRD1   | NM_001199207 | 2-11, 13, 15-16,<br>18, 20-27 |
| ASNS       | NM_001673    | 4-12                          |
| CYP3A5     | NM_000777    | 1-9, 11-13                    |
| CYP3A4     | NM_017460    | 1-9, 11-13                    |
| STAG3      | NM_012447    | 14                            |
| GNB2       | NM_005273    | 6                             |
| ZAN        | NM_173059    | 2-13, 15-47                   |
| MUC3A      | NM_005960    | 9, 11-14                      |
| CUX1       | NM_181552    | 19                            |
| FEZF1      | NM_001024613 | 4                             |
| IMPDH1     | NM_000883    | 1-7, 9, 11-17                 |
| CPA5       | NM_080385    | 6                             |
| KDM7A      | NM_030647    | 1                             |
| MKRN1      | NM_013446    | 1                             |
| PRSS1      | NM_002769    | 1, 3-4                        |
| TRPV6      | NM_018646    | 4, 11                         |
| TRPV5      | NM_019841    | 1-5, 7-15                     |
| SLC4A2     | NM_003040    | 8                             |
| KMT2C      | NM_170606    | 1-6, 9-13, 25-59              |
| RBM33      | NM_053043    | 18                            |
| MSRA       | NM_012331    | 5                             |
| NAT1       | NM_001160175 | 4-5                           |
| CSGALNACT1 | NM_018371    | 4-9                           |
| ATP6V1B2   | NM_001693    | 11                            |
| TNFRSF10C  | NM_003841    | 3-4                           |
| TNFRSF10D  | NM_003840    | 8                             |
| SCARA3     | NM_016240    | 3                             |
| POMK       | NM_001277971 | 4                             |
| ST18       | NM_014682    | 12                            |

|           |              |                    |
|-----------|--------------|--------------------|
| ASPH      | NM_004318    | 1                  |
| ARFGEF1   | NM_006421    | 1                  |
| TRPA1     | NM_007332    | 1-10, 13-23, 25-27 |
| JPH1      | NM_020647    | 1                  |
| RIMS2     | NM_001100117 | 24                 |
| FAM91A1   | NM_144963    | 1-23               |
| CYP11B1   | NM_000497    | 1-2, 5-9           |
| CYP11B2   | NM_000498    | 1-2, 5-9           |
| HSF1      | NM_005526    | 3                  |
| RFX3      | NM_134428    | 14                 |
| PRSS3     | NM_007343    | 3-4                |
| FAM205A   | NM_001141917 | 1-3                |
| DNAJB5    | NM_001135004 | 3                  |
| SPAG8     | NM_172312    | 7                  |
| CNTNAP3   | NM_033655    | 10                 |
| PSAT1     | NM_058179    | 1-5, 7-9           |
| UBQLN1    | NM_013438    | 7, 9, 11           |
| CDK20     | NM_001039803 | 7                  |
| FAM120AOS | NM_198841    | 1                  |
| FAM120A   | NM_014612    | 1-5, 8-18          |
| PHF2      | NM_005392    | 1-20, 22           |
| ZNF510    | NM_014930    | 5                  |
| NIPSNAP3B | NM_018376    | 3-4                |
| EPB41L4B  | NM_019114    | 16                 |
| C9orf43   | NM_152786    | 10                 |
| LHX2      | NM_004789    | 4                  |
| HSPA5     | NM_005347    | 1-7                |
| PBX3      | NM_006195    | 5                  |
| DNM1      | NM_004408    | 1-18, 21           |
| CEL       | NM_001807    | 2-7, 10-11         |
| SURF4     | NM_033161    | 1                  |
| NACC2     | NM_144653    | 5                  |
| RABL6     | NM_001173988 | 1-10, 13-15        |
| TUBB4B    | NM_006088    | 2                  |
| PNPLA7    | NM_001098537 | 24                 |
| CACNA1B   | NM_000718    | 1-2, 14, 28, 33    |
| PFKP      | NM_002627    | 5, 17-18           |
| AKR1C1    | NM_001353    | 2-5, 7             |
| AKR1C2    | NM_205845    | 3-6, 8             |
| GDI2      | NM_001494    | 8                  |
| PRKCQ     | NM_006257    | 13                 |
| ARMC4     | NM_018076    | 3-7, 11-20         |
| ZNF33A    | NM_001278177 | 1, 3, 5            |
| ZNF33B    | NM_006955    | 3, 5               |
| WASHC2C   | NM_015262    | 1                  |

|              |              |                                                       |
|--------------|--------------|-------------------------------------------------------|
| SYT15        | NM_031912    | 1                                                     |
| MAPK8        | NM_139049    | 9                                                     |
| NCOA4        | NM_001145260 | 2-8, 10-11                                            |
| ASAH2        | NM_019893    | 1-3                                                   |
| STOX1        | NM_152709    | 2-4                                                   |
| HKDC1        | NM_025130    | 7                                                     |
| ADAMTS14     | NM_139155    | 8                                                     |
| SPOCK2       | NM_001244950 | 11                                                    |
| FAM149B1     | NM_173348    | 11                                                    |
| SFTPA2       | NM_001098668 | 4                                                     |
| SFTPA1       | NM_001093770 | 4                                                     |
| GLUD1        | NM_005271    | 1, 5-13                                               |
| PTEN         | NM_000314    | 1-7                                                   |
| CYP2C18      | NM_000772    | 2, 4-9                                                |
| CYP2C19      | NM_000769    | 2, 4-7, 9                                             |
| CYP2C9       | NM_000771    | 2, 4-7, 9                                             |
| TLL2         | NM_012465    | 6, 11, 20                                             |
| PGAM1        | NM_002629    | 1                                                     |
| GOLGA7B      | NM_001010917 | 5                                                     |
| NPM3         | NM_006993    | 3                                                     |
| DMBT1        | NM_007329    | 1-6, 8-9, 11, 18-19, 21, 25, 27, 30, 36, 39-40, 42-53 |
| HMX3         | NM_001105574 | 2                                                     |
| OAT          | NM_000274    | 3-9                                                   |
| PPP2R2D      | NM_018461    | 7                                                     |
| SCT          | NM_021920    | 2-4                                                   |
| MUC6         | NM_005961    | 1-30, 32-33                                           |
| MUC2         | NM_002457    | 1-29, 31-50                                           |
| SYT8         | NM_138567    | 3                                                     |
| SLC22A18     | NM_183233    | 7                                                     |
| HBG2         | NM_000184    | 2                                                     |
| TRIM6-TRIM34 | NM_001003819 | 2, 8                                                  |
| TRIM34       | NM_021616    | 2                                                     |
| CALCB        | NM_000728    | 3-4                                                   |
| SAA1         | NM_199161    | 4                                                     |
| LDHA         | NM_001165414 | 1-3, 6-7                                              |
| KBTBD4       | NM_018095    | 1                                                     |
| FOLH1        | NM_004476    | 1, 10, 13                                             |
| FADS1        | NM_013402    | 1, 10                                                 |
| FTH1         | NM_002032    | 2-4                                                   |
| INCENP       | NM_001040694 | 12                                                    |
| SCGB1D1      | NM_006552    | 1                                                     |
| SCGB1D4      | NM_206998    | 1, 3                                                  |
| SLC22A24     | NM_001136506 | 1                                                     |

|          |              |                    |
|----------|--------------|--------------------|
| SLC22A25 | NM_199352    | 1-2, 5, 7, 9       |
| BAD      | NM_032989    | 3                  |
| EHD1     | NM_006795    | 1, 3, 5            |
| BANF1    | NM_001143985 | 2                  |
| GRK2     | NM_001619    | 7-8, 19-21         |
| UNC93B1  | NM_030930    | 1-9                |
| RPS3     | NM_001260506 | 1, 3-6             |
| PAK1     | NM_001128620 | 10                 |
| GRM5     | NM_001143831 | 3-9                |
| TYR      | NM_000372    | 1-3                |
| FOLH1B   | NM_153696    | 5, 8               |
| CASP4    | NM_001225    | 6-7                |
| CASP5    | NM_001136112 | 1-5, 7-9           |
| CASP1    | NM_001257118 | 1, 3, 5-7, 9       |
| CARD16   | NM_001017534 | 1                  |
| GRIA4    | NM_000829    | 14-15              |
| SDHD     | NM_003002    | 1-3                |
| ABCG4    | NM_022169    | 4                  |
| HSPA8    | NM_006597    | 4, 7-8             |
| SNX19    | NM_014758    | 1-8, 10-11         |
| VWF      | NM_000552    | 2-22, 29-30, 35-52 |
| CHD4     | NM_001273    | 20, 23             |
| ZNF384   | NM_001135734 | 11                 |
| TPI1     | NM_000365    | 1-3, 5-7           |
| ENO2     | NM_001975    | 7, 9               |
| YBX3     | NM_003651    | 1                  |
| PRB3     | NM_006249    | 2, 4               |
| PRB4     | NM_002723    | 2                  |
| PRB1     | NM_199353    | 2                  |
| PRB2     | NM_006248    | 2                  |
| PLBD1    | NM_024829    | 1                  |
| AEBP2    | NM_001114176 | 1                  |
| SLCO1B7  | NM_001009562 | 2, 4, 6, 9, 12     |
| ITPR2    | NM_002223    | 1                  |
| ARID2    | NM_152641    | 5, 8               |
| FKBP11   | NM_016594    | 1                  |
| TUBA1A   | NM_006009    | 1                  |
| KCNH3    | NM_012284    | 1                  |
| AQP6     | NM_001652    | 3                  |
| KRT81    | NM_002281    | 1, 4, 8-9          |
| KRT83    | NM_002282    | 1, 3-5, 8-9        |
| KRT85    | NM_002283    | 1, 3-5, 7-9        |
| KRT6B    | NM_005555    | 5, 7               |
| KRT6C    | NM_173086    | 5-7                |
| KRT6A    | NM_005554    | 2, 5, 7            |

|          |              |                                     |
|----------|--------------|-------------------------------------|
| KRT71    | NM_033448    | 1, 7                                |
| KRT72    | NM_080747    | 7                                   |
| KRT73    | NM_175068    | 7                                   |
| KRT76    | NM_015848    | 1, 5-7                              |
| KRT79    | NM_175834    | 7                                   |
| KRT8     | NM_001256282 | 1, 4-5, 7-8                         |
| KRT18    | NM_000224    | 2                                   |
| RARG     | NM_000966    | 5, 8                                |
| ATP5MC2  | NM_005176    | 2-3, 5                              |
| ITGA5    | NM_002205    | 1                                   |
| RPS26    | NM_001029    | 1, 3-4                              |
| R3HDM2   | NM_014925    | 14                                  |
| DPY19L2  | NM_173812    | 1                                   |
| BEST3    | NM_032735    | 8                                   |
| CHPT1    | NM_020244    | 9                                   |
| STAB2    | NM_017564    | 5, 9, 13, 21, 24,<br>37, 45, 63, 67 |
| CHST11   | NM_018413    | 3                                   |
| ARPC3    | NM_001278556 | 1-4, 6-7                            |
| PTPN11   | NM_002834    | 1-2, 4-15                           |
| LHX5     | NM_022363    | 3                                   |
| RAB35    | NM_006861    | 3                                   |
| COX6A1   | NM_004373    | 1-2                                 |
| CABP1    | NM_001033677 | 3                                   |
| UNC119B  | NM_001080533 | 4                                   |
| SPPL3    | NM_139015    | 1                                   |
| KMT5A    | NM_020382    | 1-7                                 |
| NCOR2    | NM_006312    | 16                                  |
| EP400    | NM_015409    | 47                                  |
| MPHOSPH8 | NM_017520    | 1-2, 4-14                           |
| PSPC1    | NM_001042414 | 2-4, 6-7                            |
| CDX2     | NM_001265    | 2                                   |
| HMGB1    | NM_002128    | 5                                   |
| SLC25A15 | NM_014252    | 2-5, 7                              |
| ELF1     | NM_172373    | 7                                   |
| FAM124A  | NM_145019    | 1                                   |
| KLHL1    | NM_020866    | 1                                   |
| MBNL2    | NM_144778    | 8                                   |
| RBM23    | NM_001077351 | 12                                  |
| ACIN1    | NM_014977    | 19                                  |
| MYH6     | NM_002471    | 3-13, 15-25, 27-<br>35, 37-39       |
| MYH7     | NM_000257    | 3-14, 16-26, 28-40                  |
| DHRS4    | NM_021004    | 1-2, 4-5, 8                         |
| DHRS4L2  | NM_198083    | 1-2, 4-5                            |

|          |              |                                                      |
|----------|--------------|------------------------------------------------------|
| DHRS4L1  | NM_001277864 | 2, 5                                                 |
| IRF9     | NM_006084    | 5                                                    |
| ADCY4    | NM_001198592 | 25                                                   |
| GZMB     | NM_004131    | 1-2, 4-5                                             |
| SCFD1    | NM_016106    | 1                                                    |
| ATP5S    | NM_001003803 | 3                                                    |
| PPP2R5E  | NM_006246    | 7                                                    |
| ACTN1    | NM_001130004 | 2, 4, 7, 10-12, 14, 17, 21                           |
| ZFYVE1   | NM_021260    | 5                                                    |
| FAM161B  | NM_152445    | 1                                                    |
| BBOF1    | NM_025057    | 12                                                   |
| COX8C    | NM_182971    | 1                                                    |
| CCDC85C  | NM_001144995 | 4                                                    |
| HSP90AA1 | NM_001017963 | 1-7, 11-12                                           |
| EIF5     | NM_001969    | 7                                                    |
| CKB      | NM_001823    | 6                                                    |
| ZFYVE21  | NM_001198953 | 1                                                    |
| HERC2    | NM_004667    | 5-7, 11-16, 21-23, 49-50, 53-64, 66-69, 71-75, 77-93 |
| CHRNA7   | NM_001190455 | 1-4                                                  |
| FMN1     | NM_001277313 | 6-21                                                 |
| SRP14    | NM_003134    | 5                                                    |
| RAD51    | NM_133487    | 2-3, 5-10                                            |
| STRC     | NM_153700    | 1, 23-24                                             |
| CATSPER2 | NM_172095    | 4, 7, 9-10, 13                                       |
| EIF3J    | NM_003758    | 2                                                    |
| DUOX2    | NM_014080    | 2-5, 9-34                                            |
| DUOXA1   | NM_001276264 | 10-11                                                |
| IGDCC3   | NM_004884    | 1                                                    |
| CELF6    | NM_052840    | 2                                                    |
| ARID3B   | NM_006465    | 9                                                    |
| PDE8A    | NM_002605    | 21                                                   |
| MESP1    | NM_018670    | 1                                                    |
| SEMA4B   | NM_198925    | 1                                                    |
| RHBDF1   | NM_022450    | 6, 18                                                |
| HBZ      | NM_005332    | 3                                                    |
| HBA2     | NM_000517    | 2-3                                                  |
| HBA1     | NM_000558    | 2-3                                                  |
| ARHGDI3  | NM_001176    | 6                                                    |
| EME2     | NM_001257370 | 1                                                    |
| CASKIN1  | NM_020764    | 1                                                    |
| BRICD5   | NM_182563    | 2                                                    |
| PDPK1    | NM_002613    | 1, 11-14                                             |
| ALG1     | NM_019109    | 1-5                                                  |

|          |              |                    |
|----------|--------------|--------------------|
| TMEM186  | NM_015421    | 1                  |
| PLA2G10  | NM_003561    | 1, 4               |
| PDXDC1   | NM_015027    | 4                  |
| MPV17L   | NM_001128423 | 1                  |
| ABCC6    | NM_001171    | 10-31              |
| SMG1     | NM_015092    | 30-63              |
| ACSM2B   | NM_001105069 | 10                 |
| OTOA     | NM_144672    | 1-19               |
| NUPR1    | NM_001042483 | 1                  |
| SULT1A1  | NM_177530    | 5-6                |
| QPRT     | NM_014298    | 1                  |
| TAOK2    | NM_016151    | 13                 |
| TBC1D10B | NM_015527    | 9                  |
| FBRS     | NM_001105079 | 8                  |
| STX1B    | NM_052874    | 8                  |
| ITGAX    | NM_000887    | 14                 |
| ITGAD    | NM_005353    | 14                 |
| VPS35    | NM_018206    | 1-2, 4, 6-17       |
| GPT2     | NM_133443    | 3, 8               |
| ADCY7    | NM_001114    | 24                 |
| CES1     | NM_001025195 | 1-2, 5, 7, 9-11    |
| CPNE2    | NM_152727    | 16                 |
| CES4A    | NM_173815    | 5                  |
| E2F4     | NM_001950    | 7                  |
| RANBP10  | NM_020850    | 10                 |
| DPEP2    | NM_022355    | 2                  |
| NOB1     | NM_014062    | 7                  |
| HYDIN    | NM_001270974 | 2-11, 13-75, 85-86 |
| HP       | NM_005143    | 2, 6-7             |
| HPR      | NM_020995    | 2                  |
| WDR59    | NM_030581    | 1                  |
| TMEM231  | NM_001077416 | 1, 5-6             |
| GCSH     | NM_004483    | 1-4                |
| SLC7A5   | NM_003486    | 2-10               |
| CA5A     | NM_001739    | 1                  |
| ZC3H18   | NM_144604    | 8                  |
| TUBB3    | NM_006086    | 1-3                |
| PRDM7    | NM_001098173 | 1-2, 4-8           |
| YWHAE    | NM_006761    | 1, 3, 5-6          |
| SMG6     | NM_017575    | 10-19              |
| PAFAH1B1 | NM_000430    | 2-4, 6-7, 9-11     |
| ALOX15   | NM_001140    | 1-5, 7, 9-14       |
| TM4SF5   | NM_003963    | 4                  |
| DLG4     | NM_001128827 | 1                  |
| SOX15    | NM_006942    | 1                  |

|         |              |                                                              |
|---------|--------------|--------------------------------------------------------------|
| ALOX15B | NM_001141    | 8, 14                                                        |
| AURKB   | NM_004217    | 8                                                            |
| RPL26   | NM_000987    | 3-4                                                          |
| MYH10   | NM_001256012 | 16                                                           |
| DHRS7C  | NM_001220493 | 3                                                            |
| MYH13   | NM_003802    | 3-4, 6-14, 16-36,<br>38-41                                   |
| MYH8    | NM_002472    | 3-4, 6-14, 16-26,<br>28-34, 36-40                            |
| MYH4    | NM_017533    | 4, 16, 18, 23-24,<br>30                                      |
| MYH1    | NM_005963    | 4, 7-8, 11-14, 16,<br>18, 20-21, 23-24,<br>28, 30-31, 34, 40 |
| MYH2    | NM_001100112 | 3-4, 6-26, 28-40                                             |
| COX10   | NM_001303    | 1-5, 7                                                       |
| ZSWIM7  | NM_001042697 | 1                                                            |
| MED9    | NM_018019    | 2                                                            |
| MAP2K3  | NM_145109    | 1-2, 6-9, 11                                                 |
| NOS2    | NM_000625    | 2-17, 19, 21                                                 |
| TNFAIP1 | NM_021137    | 2, 6                                                         |
| MRPL45  | NM_032351    | 5-8                                                          |
| PIP4K2B | NM_003559    | 1                                                            |
| CACNB1  | NM_000723    | 7                                                            |
| NR1D1   | NM_021724    | 8                                                            |
| KRT33B  | NM_002279    | 2                                                            |
| KRT31   | NM_002277    | 2-3, 7                                                       |
| KRT15   | NM_002275    | 1, 3                                                         |
| KRT14   | NM_000526    | 2, 4, 7-8                                                    |
| STAT5B  | NM_012448    | 2-6, 9-19                                                    |
| STAT5A  | NM_003152    | 3-6, 10-20                                                   |
| TUBG1   | NM_001070    | 1-7, 10-11                                                   |
| TUBG2   | NM_016437    | 3, 6, 10-11                                                  |
| HDAC5   | NM_001015053 | 5                                                            |
| ADAM11  | NM_002390    | 16                                                           |
| PLCD3   | NM_133373    | 8                                                            |
| NPEPPS  | NM_006310    | 1                                                            |
| MRPL10  | NM_148887    | 3-6                                                          |
| ATP5MC1 | NM_001002027 | 2-3                                                          |
| PHB     | NM_002634    | 2, 5-6                                                       |
| VEZF1   | NM_007146    | 5                                                            |
| LPO     | NM_006151    | 6                                                            |
| RPS6KB1 | NM_003161    | 1-4, 11, 14-15                                               |
| KCNH6   | NM_030779    | 1, 5, 7-8                                                    |
| CSH2    | NM_020991    | 2-3                                                          |
| GH2     | NM_022557    | 2-3                                                          |



|            |              |                 |
|------------|--------------|-----------------|
| CSH1       | NM_001317    | 3               |
| CSHL1      | NM_022579    | 2-3             |
| GH1        | NM_000515    | 2-3             |
| ERN1       | NM_001433    | 14              |
| ABCA8      | NM_007168    | 12              |
| ABCA9      | NM_080283    | 35              |
| H3F3B      | NM_005324    | 4               |
| EVPL       | NM_001988    | 8               |
| RFNG       | NM_002917    | 6               |
| DLGAP1     | NM_004746    | 7, 13           |
| ANKRD62    | NM_001277333 | 2               |
| ROCK1      | NM_005406    | 1-29            |
| ATP5F1A    | NM_004046    | 1-5, 7-12       |
| POLI       | NM_007195    | 1               |
| SERPINB4   | NM_002974    | 5-8             |
| SERPINB3   | NM_006919    | 5-8             |
| HCN2       | NM_001194    | 5-7             |
| POLRMT     | NM_005035    | 1-2, 4-9, 11-21 |
| ARID3A     | NM_005224    | 9               |
| GRIN3B     | NM_138690    | 9               |
| AP3D1      | NM_001261826 | 25              |
| SPPL2B     | NM_152988    | 11              |
| CELF5      | NM_021938    | 6               |
| NFIC       | NM_001245002 | 2               |
| MPND       | NM_032868    | 4               |
| SH3GL1     | NM_003025    | 1-5, 7-10       |
| HDGFL2     | NM_001001520 | 9               |
| PLIN4      | NM_001080400 | 1-2, 4-6        |
| KDM4B      | NM_015015    | 11              |
| PTPRS      | NM_002850    | 34-35, 38       |
| SAFB2      | NM_014649    | 15              |
| SLC25A23   | NM_024103    | 8               |
| TUBB4A     | NM_006087    | 1-3             |
| TNFSF9     | NM_003811    | 1               |
| XAB2       | NM_020196    | 18              |
| RPS28      | NM_001031    | 1               |
| GADD45GIP1 | NM_052850    | 2               |
| RFX1       | NM_002918    | 17, 19          |
| PTGER1     | NM_000955    | 3               |
| GIPC1      | NM_202470    | 3-4             |
| BRD4       | NM_058243    | 19              |
| CYP4F3     | NM_001199209 | 2-12            |
| CYP4F2     | NM_001082    | 2-8, 10-12      |
| LRRC25     | NM_145256    | 2               |
| TMEM59L    | NM_012109    | 1               |

|          |              |                |
|----------|--------------|----------------|
| UQCRFS1  | NM_006003    | 1              |
| RHPN2    | NM_033103    | 1-2, 4-5, 7    |
| ATP4A    | NM_000704    | 13             |
| APLP1    | NM_001024807 | 1              |
| POLR2I   | NM_006233    | 2              |
| ZNF585B  | NM_152279    | 4              |
| YIF1B    | NM_001039672 | 8              |
| LGALS16  | NM_001190441 | 1-3            |
| LGALS14  | NM_020129    | 1-2            |
| CYP2A6   | NM_000762    | 3              |
| CYP2A7   | NM_000764    | 3              |
| CYP2B6   | NM_000767    | 1-4, 6-8       |
| CYP2A13  | NM_000766    | 3              |
| CYP2F1   | NM_000774    | 2-4, 7-8       |
| CEACAM7  | NM_006890    | 1              |
| CEACAM5  | NM_004363    | 1, 3-4, 6, 8-9 |
| CEACAM6  | NM_002483    | 4              |
| TMEM145  | NM_173633    | 1              |
| CEACAM8  | NM_001816    | 4              |
| CD177    | NM_020406    | 1-3, 6, 9      |
| ZNF221   | NM_013359    | 6              |
| ZNF155   | NM_001260488 | 6              |
| ZNF225   | NM_013362    | 5              |
| NECTIN2  | NM_001042724 | 1              |
| TOMM40   | NM_001128917 | 2-3, 6-8       |
| APOC1    | NM_001645    | 3-4            |
| CCDC61   | NM_001267723 | 9              |
| ZC3H4    | NM_015168    | 6              |
| KPTN     | NM_007059    | 12             |
| KCNA7    | NM_031886    | 1              |
| CCDC155  | NM_144688    | 20             |
| PTH2     | NM_178449    | 1              |
| SYT3     | NM_001160329 | 6              |
| ACP4     | NM_033068    | 1              |
| KLK2     | NM_005551    | 2-3, 5         |
| SIGLEC9  | NM_014441    | 1              |
| SIGLEC8  | NM_014442    | 1              |
| ZNF175   | NM_007147    | 3              |
| SIGLEC5  | NM_003830    | 1              |
| SIGLEC14 | NM_001098612 | 1, 4-7         |
| ZNF615   | NM_001199324 | 3              |
| ZNF766   | NM_001010851 | 2              |
| ZNF528   | NM_032423    | 5              |
| ZNF415   | NM_018355    | 3              |
| LILRB2   | NM_005874    | 4,8            |

|          |              |                                       |
|----------|--------------|---------------------------------------|
| LILRA3   | NM_006865    | 1,7                                   |
| LILRA1   | NM_006863    | 8                                     |
| KIR2DL3  | NM_015868    | 1                                     |
| KIR2DL4  | NM_002255    | 1-3, 6-7                              |
| KIR3DL1  | NM_013289    | 2-3                                   |
| KIR3DL2  | NM_006737    | 3                                     |
| BRSK1    | NM_032430    | 1, 8, 12                              |
| ZNF787   | NM_001002836 | 4                                     |
| RPS5     | NM_001009    | 2                                     |
| CSNK2A1  | NM_001895    | 5-7, 9, 12                            |
| NOP56    | NM_006392    | 1-11                                  |
| OXT      | NM_000915    | 2-3                                   |
| CST5     | NM_001900    | 2                                     |
| EIF2S2   | NM_003908    | 1, 3, 5-9                             |
| MYH7B    | NM_020884    | 28                                    |
| KCNK15   | NM_022358    | 2                                     |
| SNX21    | NM_033421    | 2                                     |
| GATA5    | NM_080473    | 3                                     |
| ITSN1    | NM_003024    | 12                                    |
| MX2      | NM_002463    | 3                                     |
| C21orf58 | NM_058180    | 8                                     |
| GAB4     | NM_001037814 | 2                                     |
| DGCR6    | NM_005675    | 1-2, 4                                |
| PRODH    | NM_016335    | 2-7, 9-11, 14-15                      |
| DGCR6L   | NM_033257    | 1-2                                   |
| MED15    | NM_001003891 | 6                                     |
| IGLL5    | NM_001256296 | 1                                     |
| GNAZ     | NM_002073    | 3                                     |
| BCR      | NM_004327    | 1-16, 21                              |
| IGLL1    | NM_020070    | 1                                     |
| GGT5     | NM_001099781 | 2-12                                  |
| GGT1     | NM_013430    | 5                                     |
| CRYBB2   | NM_000496    | 2-4, 6                                |
| CHEK2    | NM_001005735 | 2, 4-11                               |
| SLC5A4   | NM_014227    | 11                                    |
| APOL4    | NM_145660    | 2, 5                                  |
| APOL2    | NM_145637    | 5-6                                   |
| MFNG     | NM_002405    | 6                                     |
| APOBEC3A | NM_145699    | 4                                     |
| APOBEC3C | NM_014508    | 1                                     |
| APOBEC3D | NM_152426    | 1-2, 4                                |
| APOBEC3F | NM_145298    | 4                                     |
| APOBEC3G | NM_021822    | 3-8                                   |
| CACNA1I  | NM_001003406 | 9, 11-13, 15, 21,<br>24-25, 27, 30-31 |

|          |              |                    |
|----------|--------------|--------------------|
| XRCC6    | NM_001469    | 2-5, 8, 10-12      |
| DENND6B  | NM_001001794 | 11                 |
| GYG2     | NM_003918    | 2, 5-12            |
| ARSE     | NM_000047    | 2-8, 10            |
| NLGN4X   | NM_181332    | 2-5                |
| ANOS1    | NM_000216    | 1-9, 11, 13        |
| TRAPPC2  | NM_001128835 | 2-4, 6             |
| OFD1     | NM_003611    | 1-2, 4-11, 13-23   |
| SMS      | NM_004595    | 2-4, 6-11          |
| SAT1     | NM_002970    | 1-2, 4-6           |
| DDX3X    | NM_001356    | 4, 9, 12-14, 16    |
| KRBOX4   | NM_001129898 | 3, 5-6             |
| ZNF674   | NM_001039891 | 3, 5-6             |
| SPANXN5  | NM_001009616 | 1                  |
| IGBP1    | NM_001551    | 2, 5-7             |
| NONO     | NM_001145409 | 2                  |
| RPS4X    | NM_001007    | 1-2, 4, 6-7        |
| PCDH11X  | NM_001168360 | 3-4                |
| CSTF2    | NM_001325    | 3, 7               |
| NXF5     | NM_032946    | 3-4, 14-16         |
| H2BFM    | NM_001164416 | 2                  |
| COL4A5   | NM_033380    | 1-22, 24-51        |
| AMOT     | NM_001113490 | 2                  |
| KLHL13   | NM_001168299 | 8                  |
| SLC25A5  | NM_001152    | 1, 3               |
| XIAP     | NM_001204401 | 2-6                |
| UTP14A   | NM_006649    | 6-7                |
| SAGE1    | NM_018666    | 2, 4-14, 16-18, 20 |
| SPANXN3  | NM_001009609 | 1                  |
| SPANXN2  | NM_001009615 | 1                  |
| SPANXN1  | NM_001009614 | 1                  |
| IDS      | NM_000202    | 1-2, 4-9           |
| TMEM185A | NM_032508    | 1-4                |
| PASD1    | NM_173493    | 9                  |
| CCNQ     | NM_152274    | 5-7                |
| SLC6A8   | NM_005629    | 1                  |
| BCAP31   | NM_005745    | 2-5, 8             |
| ABCD1    | NM_000033    | 1-6                |
| RPL10    | NM_006013    | 2-5, 7             |
| IKBKG    | NM_001099856 | 1-2                |
| TMLHE    | NM_018196    | 2-6                |
|          |              |                    |
|          |              |                    |
|          |              |                    |
|          |              |                    |
